# Supplementary material for: Volcanic ash layers in Lake El'gygytgyn: eight new regionally significant chronostratigraphic markers for western Beringia
Source: Copernicus journal article supplement (doi:10.5194/cp-10-1041-2014), 2014-05-23
Supplement: Supplementary file 1 [file supplement-cover-letter.pdf › supplement-cover-letter.pdf]

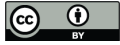

## *Supplement of*

# **Volcanic ash layers in Lake El'gygytgyn: eight new regionally significant chronostratigraphic markers for western Beringia**

**C. van den Bogaard et al.**

*Correspondence to:* C. van den Bogaard (cbogaard@geomar.de)

- Supplement-Cover-Letter.pdf
- \_\_MACOSX
  - .\_vandenBogaard\_SupplementaryData.xls
- vandenBogaard\_SupplementaryData.xls
