# Supplementary material for: Volcanic ash layers in Lake El'gygytgyn: eight new regionally significant chronostratigraphic markers for western Beringia
Source: Copernicus journal article supplement (doi:10.5194/cp-10-1041-2014), 2014-05-23
Supplement: Supplementary file 1 [file vandenBogaard_SupplementaryData.xls]

## Sheet: Table S1
Table S1. Electron probe data on volcanic glass from El'gygtgyn tephra layers analysed at University of Alberta, Canada
Sample ID	Layer	SiO2	TiO2	Al2O3	FeO	MnO	MgO	CaO	Na2O	K2O	Cl	Total	H2Odiff
UA 1936-9	T0	72	0.666863	14.2479	2.96554	0.189508	0.658668	2.61009	4.80838	1.70352	0.149558	100	2.37875
UA 1936-20	T0	72.0913	0.57788	14.2725	3.08983	0.108861	0.594158	2.632	4.71562	1.78756	0.130227	100	1.70971
UA 1936-13	T0	72.229	0.504239	14.3904	2.8452	0.185293	0.71282	2.42905	4.74167	1.83268	0.129604	100	1.23729
UA 1936-25	T0	72.2327	0.470978	14.3944	2.92475	0.137623	0.61166	2.61077	4.76075	1.70449	0.151896	100	1.90628
UA 1936-21	T0	72.3905	0.549808	14.2166	3.03255	0.108342	0.570059	2.47768	4.78019	1.77599	0.0982162	100	1.23824
UA 1936-5	T0	72.5058	0.51573	13.893	3.11473	0.152583	0.504541	2.50338	4.844	1.78013	0.186151	100	1.69283
UA 1936-2	T0	72.5257	0.538641	14.3754	3.00691	0.168451	0.594119	2.4723	4.51793	1.67947	0.121043	100	0.861632
UA 1936-1	T0	72.5516	0.503833	14.1563	2.99579	0.128981	0.589484	2.60481	4.63022	1.74427	0.0947205	100	0.760671
UA 1936-3	T0	72.5847	0.46369	14.062	2.93908	0.092738	0.635918	2.60991	4.70009	1.73858	0.173247	100	1.87413
UA 1936-7	T0	72.5978	0.496913	14.3151	2.89781	0.128565	0.540789	2.53763	4.55283	1.78562	0.146931	100	1.99498
UA 1936-19	T0	72.6166	0.453413	14.2324	2.91639	0.0878552	0.568534	2.57305	4.71893	1.71671	0.11613	100	0.973377
UA 1936-4	T0	72.6378	0.551251	14.1744	3.01377	0.100593	0.606577	2.54903	4.63131	1.57227	0.162961	100	0.589667
UA 1936-23	T0	72.6438	0.469912	14.2456	3.14535	0.117478	0.559808	2.48849	4.4989	1.69986	0.130758	100	2.10934
UA 1936-16	T0	72.7451	0.463954	14.1105	2.83289	0.208933	0.591977	2.49183	4.70202	1.73189	0.120853	100	2.36104
UA 1936-24	T0	72.7908	0.556516	13.9823	2.86922	0.139639	0.632961	2.593	4.57954	1.69605	0.160024	100	1.88968
UA 1936-18	T0	72.8241	0.536714	13.9435	2.89991	0.160705	0.594403	2.48475	4.65118	1.74612	0.158645	100	2.92786
UA 1936-8	T0	72.907	0.46509	14.048	2.97351	0.146171	0.536642	2.39087	4.62432	1.78779	0.120617	100	2.16948
UA 1936-22	T0	73.0373	0.456064	14.0288	2.91327	0.124672	0.516802	2.48278	4.56278	1.68573	0.191803	100	6.15361
UA 1936-6	T0	73.0468	0.553266	13.9387	2.8686	0.16465	0.530768	2.26931	4.59385	1.89501	0.139084	100	2.2171
UA 1936-11	T0	73.0744	0.533167	14.0318	2.87478	0.0854302	0.521845	2.43425	4.49178	1.77757	0.174978	100	2.84469
UA 1936-12	T0	73.1731	0.494987	14.011	2.8498	0.128407	0.498094	2.43351	4.47353	1.83187	0.105625	100	3.43186
UA 1936-17	T0	73.2682	0.447163	14.0557	2.90656	0.0884162	0.490863	2.41773	4.31918	1.82015	0.185979	100	1.60178
UA 1936-14	T0	73.6905	0.555069	13.251	2.82468	0.161381	0.519092	2.17196	4.83835	1.82967	0.158297	100	2.71479
UA 1936-10	T0	73.704	0.482149	13.755	2.68375	0.152474	0.478028	2.20779	4.5392	1.86575	0.13187	100	2.93451
UA 1936-15	T0	73.9272	0.454236	13.3952	2.73067	0.132485	0.481574	2.20389	4.61386	1.89896	0.161927	100	4.89523
MEAN	T0	72.7918	0.510461	14.0611	2.92461	0.136009	0.565607	2.46719	4.63562	1.76351	0.144046	100	2.21874
STDEV		0.49151	0.0518369	0.276562	0.108847	0.0334281	0.0595578	0.132937	0.127632	0.0750761	0.0275564	0	1.24532
n		25	25	25	25	25	25	25	25	25	25	25	25
UA 1937-6	T0	72.1494	0.520532	14.3515	3.01172	0.212712	0.551212	2.53925	4.80648	1.70477	0.152376	100	2.21541
UA 1937-21	T0	72.3156	0.412561	14.0378	2.98305	0.162336	0.694839	2.64287	4.84526	1.76502	0.140622	100	3.28698
UA 1937-11	T0	72.4688	0.480456	14.0447	2.81847	0.148931	0.620206	2.51653	4.98205	1.75963	0.160152	100	1.9681
UA 1937-25	T0	72.4935	0.444078	14.2457	2.98945	0.201853	0.557115	2.53528	4.64868	1.68951	0.194789	100	0.918203
UA 1937-5	T0	72.6537	0.477608	14.0435	2.97868	0.183304	0.646654	2.55403	4.59074	1.72815	0.143588	100	1.80227
UA 1937-1	T0	72.7401	0.421084	14.1312	2.93339	0.0578357	0.577342	2.5123	4.59439	1.82842	0.203947	100	1.44495
UA 1937-16	T0	72.7424	0.54883	14.098	2.9199	0.12436	0.590969	2.48001	4.64655	1.69068	0.158277	100	2.70209
UA 1937-23	T0	72.7596	0.570589	14.1199	2.89348	0.118577	0.542212	2.41918	4.64174	1.81311	0.121618	100	1.33002
UA 1937-7	T0	72.8173	0.545376	14.1933	2.82539	0.163511	0.588031	2.56743	4.3955	1.76612	0.138121	100	1.53574
UA 1937-14	T0	72.8596	0.516036	13.9984	2.96644	0.083792	0.638659	2.60777	4.49616	1.66256	0.17065	100	2.13866
UA 1937-22	T0	72.8832	0.387745	14.0767	2.91371	0.148346	0.61896	2.40013	4.66522	1.78833	0.117653	100	2.25532
UA 1937-9	T0	72.9132	0.525245	13.9895	2.68983	0.0933542	0.618599	2.49902	4.64924	1.88247	0.139518	100	2.52174
UA 1937-18	T0	72.9721	0.470217	14.0691	2.86255	0.0360912	0.606332	2.49751	4.52996	1.78084	0.1753	100	3.02343
UA 1937-17	T0	72.9909	0.499016	13.9773	2.85679	0.0911959	0.560496	2.47561	4.5475	1.85158	0.149602	100	2.40787
UA 1937-4	T0	73.0481	0.612211	14.0403	2.83352	0.0969335	0.606089	2.39681	4.43037	1.805	0.130605	100	1.99464
UA 1937-15	T0	73.0986	0.473964	13.9436	2.75761	0.18286	0.527561	2.42447	4.64506	1.79812	0.148179	100	4.84507
UA 1937-12	T0	73.1441	0.486458	14.1633	2.62119	0.106635	0.53419	2.24035	4.7224	1.8067	0.174678	100	1.53317
UA 1937-2	T0	73.172	0.481272	13.9593	2.84001	0.176297	0.608935	2.3709	4.65162	1.59884	0.140835	100	1.30314
UA 1937-10	T0	73.2578	0.54693	13.675	2.84464	0.1487	0.514338	2.3191	4.66265	1.84754	0.183328	100	1.81551
UA 1937-20	T0	73.2961	0.523172	13.7863	2.75592	0.0957775	0.568486	2.35118	4.66632	1.81153	0.145211	100	2.9
UA 1937-19	T0	73.9916	0.420835	13.4949	2.80761	0.0849861	0.540634	2.16561	4.47559	1.87584	0.142326	100	2.33697
UA 1937-8	T0	74.3149	0.456666	13.452	2.60481	0.0766432	0.45773	2.18327	4.36121	1.9065	0.186286	100	6.05825
UA 1937-24	T0	74.4536	0.378275	13.4141	2.58895	0.109822	0.388443	2.15576	4.55964	1.82121	0.130159	100	1.6588
MEAN	T0	73.0233	0.48692	13.9698	2.839	0.126298	0.572088	2.42845	4.61801	1.78185	0.154253	100	2.34767
STDEV		0.569951	0.0594233	0.246909	0.123601	0.0476468	0.0647745	0.139547	0.142307	0.0754156	0.0233076	0	1.15818
n		23	23	23	23	23	23	23	23	23	23	23	23
UA 1938-16	T0	71.9893	0.555775	14.2593	2.94949	0.132814	0.647723	2.72881	4.92842	1.67448	0.133836	100	2.11868
UA 1938-1	T0	72.0017	0.561689	14.3758	2.84548	0.179	0.667649	2.72512	4.76304	1.77045	0.110075	100	2.79317
UA 1938-10	T0	72.27	0.541984	14.0231	2.99613	0.171527	0.640434	2.51302	4.96108	1.70207	0.180661	100	1.47302
UA 1938-20	T0	72.4256	0.535842	14.1547	3.0677	0.153539	0.575	2.59781	4.5052	1.82393	0.160753	100	2.95655
UA 1938-5	T0	72.4275	0.576574	14.199	2.99002	0.0959256	0.607188	2.55631	4.70239	1.73891	0.10613	100	2.00735
UA 1938-7	T0	72.5285	0.458887	14.1883	3.02681	0.187447	0.613557	2.47062	4.70974	1.63991	0.17618	100	2.37249
UA 1938-21	T0	72.5515	0.500359	14.2538	3.01873	0.0663001	0.614312	2.4272	4.79018	1.6575	0.120169	100	3.46921
UA 1938-6	T0	72.685	0.362152	14.1402	2.9196	0.128178	0.591041	2.46487	4.81683	1.71921	0.172938	100	1.69886
UA 1938-11	T0	72.7671	0.536354	13.7945	2.94485	0.110126	0.537374	2.40646	4.93834	1.8079	0.157032	100	1.93051
UA 1938-4	T0	72.8114	0.471978	14.2645	2.74255	0.110636	0.657724	2.39135	4.59189	1.78032	0.177626	100	1.4784
UA 1938-17	T0	72.8261	0.384771	13.9967	2.72095	0.139824	0.623594	2.43926	4.92344	1.79628	0.149009	100	2.01964
UA 1938-24	T0	72.8389	0.512363	13.9563	2.94635	0.197378	0.577815	2.47489	4.60309	1.79685	0.096132	100	2.21783
UA 1938-19	T0	72.9111	0.501431	13.8937	2.76659	0.157915	0.548601	2.4323	4.84307	1.82217	0.123051	100	2.47918
UA 1938-15	T0	73.0101	0.499736	14.1841	2.8308	0.134504	0.542156	2.39314	4.41795	1.85202	0.135539	100	3.34894
UA 1938-14	T0	73.0199	0.594738	14.1717	2.69683	0.0861344	0.639856	2.46611	4.52923	1.67244	0.123049	100	2.47801
UA 1938-25	T0	73.0967	0.522556	13.9878	2.97249	0.143265	0.570998	2.55918	4.25775	1.74598	0.143265	100	2.97691
UA 1938-13	T0	73.1383	0.454623	13.8484	2.83368	0.111084	0.535879	2.35334	4.79103	1.81541	0.118284	100	2.77658
UA 1938-18	T0	73.218	0.520334	13.7808	2.98631	0.106107	0.50707	2.31702	4.71055	1.74975	0.104067	100	1.98598
UA 1938-8	T0	73.4178	0.503832	13.6052	2.66032	0.0978816	0.55947	2.31928	4.78074	1.86181	0.193702	100	2.94393
UA 1938-3	T0	73.6344	0.483199	13.6812	2.68512	0.0907273	0.556597	2.36299	4.55064	1.81149	0.143736	100	1.90382
UA 1938-22	T0	73.6625	0.508987	13.504	2.90308	0.113906	0.537721	2.21553	4.57678	1.84303	0.13443	100	2.55162
UA 1938-2	T0	73.7368	0.408673	13.7707	2.65586	0.1172	0.478993	2.24108	4.57591	1.90272	0.112105	100	1.8775
MEAN	T0	72.8622	0.499856	14.0015	2.8709	0.128701	0.583216	2.44799	4.69397	1.77203	0.139626	100	2.35719
STDEV		0.49293	0.0588516	0.239847	0.132382	0.0347809	0.0511545	0.131608	0.183058	0.0716317	0.0282296	0	0.568905
n		22	22	22	22	22	22	22	22	22	22	22	22
MEAN	T0	72.89	0.499393	14.0124	2.8796	0.130522	0.573271	2.44843	4.64817	1.77221	0.14601	100	2.30462
STDEV		0.520783	0.056665	0.255053	0.125033	0.0387117	0.0584914	0.133746	0.15281	0.0734435	0.0267752	0	1.0343
n		70	70	70	70	70	70	70	70	70	70	70	70
UA 1939-25	T1	77.3868	0.239927	12.4099	1.17734	0.119963	0.266467	1.23467	4.21464	2.8133	0.136949	100	5.80451
UA 1939-1	T1	77.4384	0.235386	12.387	1.15254	0.0551354	0.235386	1.20344	4.12031	2.99427	0.17813	100	5.68668
UA 1939-5	T1	77.5393	0.209445	12.3117	1.30664	0.0871803	0.202003	1.19288	4.00073	2.97689	0.173297	100	5.94206
UA 1939-24	T1	77.5662	0.267063	12.4088	1.13848	0.0351119	0.214927	1.1438	4.24109	2.72808	0.256423	100	6.01465
UA 1939-6	T1	77.5728	0.132776	12.5557	1.2496	0.117786	0.227005	1.22176	3.9501	2.87718	0.0952992	100	6.60993
UA 1939-22	T1	77.6002	0.289124	12.3307	1.16383	0.0199035	0.225223	1.26963	3.96079	3.00333	0.137229	100	4.53922
UA 1939-2	T1	77.6022	0.20984	12.154	1.2878	0.0575195	0.216231	1.28354	4.18295	2.86319	0.142734	100	6.11878
UA 1939-11	T1	77.6655	0.235773	12.4628	1.20117	0.0849631	0.244269	1.1778	3.99645	2.75812	0.173112	100	5.84152
UA 1939-20	T1	77.674	0.173972	12.5625	1.26736	0.03374	0.227745	1.13029	3.86745	2.93855	0.124416	100	5.15717
UA 1939-4	T1	77.6766	0.252404	12.3904	1.12755	0.0639276	0.22044	1.19589	3.87644	3.01121	0.18517	100	9.27238
UA 1939-12	T1	77.73	0.253561	12.3832	1.13143	0.0532691	0.253561	1.19962	3.94404	2.91382	0.137434	100	6.13688
UA 1939-14	T1	77.7387	0.229037	12.057	1.3225	0.11188	0.248035	1.24229	3.98968	2.87827	0.182596	100	5.25546
UA 1939-8	T1	77.7829	0.260075	12.3332	1.27112	0	0.24382	1.20068	3.87403	2.85757	0.176634	100	7.71893
UA 1939-17	T1	77.7996	0.316223	12.279	1.25643	0.0179792	0.222096	1.15384	4.01783	2.77621	0.160756	100	5.4465
UA 1939-9	T1	77.8061	0.21264	12.2503	1.20215	0.0526336	0.194744	1.23268	3.9991	2.87274	0.176849	100	5.0037
UA 1939-16	T1	77.8523	0.158388	12.2756	1.15549	0.0648436	0.195594	1.23309	4.20314	2.7617	0.0999229	100	5.92749
UA 1939-19	T1	77.8523	0.174298	12.4831	1.11973	0.107748	0.218665	1.1979	3.91484	2.74335	0.188031	100	5.33466
UA 1939-23	T1	77.9275	0.225597	12.2458	1.11421	0.114387	0.145102	1.18412	4.07451	2.78554	0.183231	100	5.58374
UA 1939-15	T1	77.9759	0.284453	12.2589	1.17936	0.0351571	0.148086	1.17084	4.03135	2.79339	0.122517	100	6.13564
UA 1939-10	T1	78.0302	0.206541	12.3016	1.11108	0.0529591	0.230902	1.18311	3.88085	2.89475	0.108037	100	5.58758
UA 1939-18	T1	78.0369	0.276138	12.4077	1.17677	0.0456689	0.1848	1.23519	3.93284	2.54472	0.15931	100	5.84408
UA 1939-21	T1	78.1186	0.207354	12.3294	1.22308	0.0978882	0.246299	1.12203	3.64291	2.88823	0.124202	100	4.99362
UA 1939-7	T1	78.1785	0.210776	12.1932	1.16516	0.0631259	0.221476	1.15874	3.90739	2.77219	0.129462	100	6.53604
UA 1939-13	T1	78.2447	0.14245	12.2463	1.15236	0.0914232	0.204108	1.14385	3.93226	2.69486	0.147765	100	5.93196
MEAN		77.7832	0.225135	12.3341	1.19388	0.066008	0.218208	1.19632	3.98982	2.83923	0.154146	100	5.9343
STDEV		0.229405	0.0466358	0.119877	0.0642399	0.0343355	0.0296451	0.0424339	0.135195	0.11058	0.0358568	0	0.954756
n		24	24	24	24	24	24	24	24	24	24	24	24
UA 1940-6	T1	75.6461	0.370143	13.6352	1.89712	0.0552452	0.356884	1.66951	3.74894	2.49156	0.129274	100	9.49439
UA 1940-4	T1	75.7897	0.50868	13.4684	1.89238	0.067309	0.278064	1.48301	3.73951	2.64602	0.126894	100	9.37323
UA 1940-12	T1	77.5405	0.231918	12.3084	1.25988	0.0585017	0.27266	1.21078	4.16198	2.79659	0.15879	100	4.27631
UA 1940-14	T1	77.6441	0.205967	12.4449	1.21339	0.0885763	0.230512	1.19738	4.08412	2.68504	0.205967	100	6.29552
UA 1940-20	T1	77.6748	0.241524	12.4969	1.19067	0.129236	0.222456	1.23834	3.86438	2.82837	0.113347	100	5.59941
UA 1940-8	T1	77.6776	0.292423	12.3501	1.1793	0.0939167	0.220918	1.21772	4.07577	2.7588	0.133404	100	6.29996
UA 1940-3	T1	77.6963	0.243886	12.4987	1.18881	0.0506775	0.215379	1.2152	3.84199	2.92452	0.124582	100	5.28346
UA 1940-26	T1	77.7	0.197102	12.3862	1.25181	0.0891154	0.197102	1.16794	4.12447	2.75943	0.126858	100	4.61805
UA 1940-9	T1	77.7334	0.173032	12.4123	1.2229	0.0456465	0.21974	1.16982	4.03069	2.86511	0.127386	100	5.79781
UA 1940-18	T1	77.7374	0.216696	12.2231	1.20731	0.0330916	0.183605	1.20197	4.15566	2.91953	0.121692	100	6.32057
UA 1940-7	T1	77.7545	0.216756	12.3632	1.16142	0	0.17362	1.2725	4.07522	2.83723	0.145582	100	7.26884
UA 1940-15	T1	77.7748	0.203215	12.3517	1.25866	0.0446861	0.235134	1.21184	4.0409	2.71521	0.163849	100	6.01108
UA 1940-25	T1	77.7755	0.24757	12.3404	1.16191	0.0925786	0.185157	1.16607	4.25133	2.65149	0.127946	100	3.86543
UA 1940-24	T1	77.7787	0.269966	12.3739	1.10834	0.0643277	0.244656	1.20325	4.0537	2.75344	0.149747	100	5.1731
UA 1940-21	T1	77.8121	0.280958	12.3925	1.16306	0	0.232188	1.15034	3.93978	2.89334	0.135708	100	5.67998
UA 1940-23	T1	77.8441	0.331799	12.3002	1.18771	0.0348706	0.209224	1.17926	3.89494	2.9154	0.102498	100	5.36446
UA 1940-17	T1	77.8807	0.238	12.5579	1.06781	0.0701249	0.188062	1.14644	3.78993	2.873	0.188062	100	5.88228
UA 1940-2	T1	77.8836	0.24566	12.1171	1.18929	0	0.188726	1.22092	3.96008	3.00907	0.185563	100	5.15333
UA 1940-11	T1	77.9007	0.24537	12.2919	1.29802	0.0350529	0.203944	1.18649	3.86006	2.8106	0.167829	100	5.85647
UA 1940-13	T1	77.901	0.128315	12.3653	1.142	0.0556031	0.22562	1.12703	3.9243	2.9737	0.157186	100	6.48006
UA 1940-16	T1	77.903	0.213956	12.5297	1.10171	0.0574807	0.172442	1.24116	3.78947	2.84104	0.150088	100	6.0554
UA 1940-19	T1	77.9573	0.255326	12.2418	1.20882	0.0720421	0.199175	1.19293	3.85743	2.79375	0.221424	100	5.61078
UA 1940-5	T1	77.9708	0.264544	12.2154	1.13957	0.0953215	0.234555	1.20598	3.9703	2.75147	0.152086	100	6.63175
UA 1940-10	T1	77.9897	0.165468	12.2562	1.21025	0.116676	0.254566	1.21025	3.94046	2.7037	0.152739	100	5.72173
UA 1940-22	T1	78.1437	0.283402	12.3634	1.20286	0.0852336	0.164075	1.13148	3.77478	2.70297	0.148093	100	6.14033
MEAN		77.6444	0.250867	12.4514	1.2442	0.0614126	0.220339	1.2247	3.95801	2.79602	0.148664	100	6.01015
STDEV		0.594594	0.0740149	0.347533	0.202541	0.0337836	0.0412565	0.114419	0.142706	0.116685	0.0285772	0	1.26576
n		25	25	25	25	25	25	25	25	25	25	25	25
UA 1941-8	T1	77.5427	0.167193	12.3156	1.2742	0.017654	0.243002	1.1392	4.27122	2.88487	0.144347	100	3.70436
UA 1941-22	T1	77.5975	0.274278	12.4741	1.22692	0.015703	0.190529	1.17458	4.0723	2.79303	0.181107	100	4.47659
UA 1941-2	T1	77.6122	0.238484	12.3873	1.25679	0.0411544	0.21738	1.2378	4.11227	2.73624	0.160397	100	5.23489
UA 1941-20	T1	77.6605	0.253069	12.1749	1.2026	0.0794763	0.215423	1.22456	4.08362	2.96886	0.136992	100	4.374
UA 1941-9	T1	77.6651	0.315431	12.4087	1.25756	0.119718	0.250888	1.09724	3.81536	2.93882	0.131169	100	3.94101
UA 1941-3	T1	77.7769	0.262991	12.391	1.25581	0.0506971	0.164766	1.1861	3.99556	2.70596	0.210182	100	5.32
UA 1941-6	T1	77.785	0.223792	12.3276	1.30007	0.0874349	0.197769	1.1658	3.91896	2.83018	0.16342	100	3.92849
UA 1941-4	T1	77.7946	0.295467	12.4255	1.28001	0.0506515	0.154065	1.2378	3.86957	2.72885	0.163562	100	5.23488
UA 1941-11	T1	77.8275	0.273856	12.2139	1.19945	0.0615644	0.192123	1.23129	4.14074	2.70671	0.15285	100	5.78976
UA 1941-18	T1	77.8647	0.101308	12.5225	1.11857	0.0992194	0.199483	1.25643	3.99175	2.67057	0.175462	100	4.25264
UA 1941-13	T1	77.8671	0.297879	12.3061	1.13299	0.0522595	0.223671	1.16643	3.91319	2.88995	0.150507	100	4.3236
UA 1941-7	T1	77.8872	0.20896	12.3127	1.33356	0.0745536	0.194259	1.19076	3.78228	2.78684	0.228911	100	4.76652
UA 1941-1	T1	77.9183	0.12934	12.4969	1.23499	0.0563256	0.237819	1.17449	3.92506	2.66503	0.161675	100	4.12882
UA 1941-5	T1	77.9503	0.28007	12.2713	1.15175	0.0744756	0.213986	1.23147	4.01119	2.68322	0.132168	100	4.66678
UA 1941-17	T1	77.9577	0.14552	12.4442	1.14835	0.0474523	0.185591	1.17471	3.97967	2.77227	0.144466	100	5.16795
UA 1941-21	T1	77.9762	0.214878	12.3796	1.21448	0.088479	0.185385	1.10388	3.90782	2.75233	0.176958	100	5.06226
UA 1941-10	T1	78.0047	0.209569	12.2634	1.17505	0.0604727	0.183503	1.21362	3.96096	2.7317	0.197058	100	4.08894
UA 1941-25	T1	78.0186	0.241942	12.3819	1.13691	0.0214108	0.252647	1.28679	3.73618	2.84228	0.0813609	100	6.58908
UA 1941-23	T1	78.0426	0.319716	12.2778	1.0797	0.0775704	0.216988	1.22226	3.88376	2.74432	0.135224	100	4.60284
UA 1941-19	T1	78.0763	0.241929	12.1774	1.1866	0.0450343	0.232503	1.21907	3.98502	2.66331	0.172806	100	4.51733
UA 1941-24	T1	78.0835	0.130834	12.3434	1.20494	0.0706926	0.270109	1.16168	3.63065	2.91844	0.1857	100	5.22349
UA 1941-12	T1	78.0883	0.269734	12.3988	1.24248	0.0339822	0.183716	1.20318	3.56495	2.85026	0.164601	100	5.83317
UA 1941-14	T1	78.1347	0.257207	12.3075	1.23649	0.123333	0.179201	1.20592	3.80645	2.58366	0.165498	100	5.13471
UA 1941-16	T1	78.1715	0.210201	12.5068	1.10171	0.0179569	0.171119	1.09643	3.73398	2.79388	0.19647	100	5.32883
MEAN	T1	77.8877	0.231819	12.3545	1.20633	0.0611363	0.206497	1.19173	3.92052	2.77673	0.163037	100	4.82046
STDEV		0.179926	0.0604252	0.0980084	0.0655454	0.0298894	0.0301809	0.0492538	0.163217	0.0980616	0.0303494	0	0.699872
n		24	24	24	24	24	24	24	24	24	24	24	24
MEAN	T1	77.77	0.236145	12.381	1.21521	0.0628326	0.215087	1.20453	3.95614	2.80388	0.155192	100	5.59408
STDEV		0.393891	0.0617178	0.224959	0.129748	0.0323643	0.0343002	0.0770226	0.148119	0.110454	0.0318252	0	1.13133
n		73	73	73	73	73	73	73	73	73	73	73	73
UA 1942-7	T2	73.02	0.53251	13.8237	2.80959	0.0871762	0.479994	1.94413	4.55522	2.57012	0.177503	100	4.79053
UA 1942-24	T2	73.0675	0.411486	14.0572	2.69576	0.0200467	0.495893	1.94242	4.5696	2.56915	0.170925	100	5.22153
UA 1942-15	T2	73.1721	0.434413	13.7598	2.77751	0.153199	0.480582	2.22453	4.35672	2.46587	0.175234	100	4.69895
UA 1942-12	T2	73.1951	0.422301	13.8592	2.78949	0.110029	0.478888	2.08321	4.37286	2.59039	0.0985021	100	4.57053
UA 1942-21	T2	73.3205	0.439443	13.9494	2.70866	0.10589	0.522037	1.99602	4.36266	2.44288	0.152481	100	5.56222
UA 1942-17	T2	73.3759	0.540492	13.8786	2.62313	0.103656	0.454817	1.98745	4.28375	2.5565	0.195677	100	5.45658
UA 1942-23	T2	73.4329	0.409333	13.8445	2.87822	0.00752055	0.426523	2.04989	4.22548	2.53765	0.188014	100	6.92174
UA 1942-11	T2	73.4338	0.474709	13.7543	2.65125	0.118415	0.463182	1.91875	4.58781	2.4752	0.122607	100	4.57321
UA 1942-4	T2	73.4445	0.435145	13.9773	2.72123	0.132435	0.509771	2.01281	4.04874	2.56462	0.153457	100	4.85922
UA 1942-22	T2	73.4809	0.384764	13.6384	2.78456	0.15726	0.456055	2.00769	4.39281	2.56334	0.134195	100	4.61677
UA 1942-19	T2	73.5442	0.36507	13.9048	2.60946	0.101585	0.421153	1.96503	4.4147	2.47507	0.198937	100	5.49761
UA 1942-20	T2	73.6186	0.482861	13.9009	2.54215	0.121508	0.44905	2.0202	4.29186	2.40479	0.167997	100	5.3557
UA 1942-3	T2	73.647	0.448152	14.1241	2.7821	0.108897	0.463859	2.03239	3.71715	2.54546	0.130886	100	4.49675
UA 1942-13	T2	73.6526	0.41853	13.8168	2.53866	0.0718688	0.453407	2.03875	4.37237	2.47947	0.157477	100	5.3831
UA 1942-14	T2	73.6721	0.464452	13.8406	2.71583	0.152349	0.45493	1.97419	4.04147	2.56771	0.116377	100	5.48001
UA 1942-5	T2	73.6824	0.561484	13.8434	2.81508	0.116018	0.479395	1.95261	3.90193	2.46812	0.1795	100	8.6349
UA 1942-8	T2	75.2042	0.391014	13.2907	2.21858	0.113692	0.292198	1.3473	4.1439	2.80404	0.194444	100	5.88574
UA 1942-9	T2	75.7279	0.346016	13.1784	2.01472	0.0994664	0.225387	1.34809	4.1141	2.75226	0.193642	100	5.49572
UA 1942-10	T2	75.8036	0.321827	13.1583	2.01728	0.0852522	0.25256	1.28944	4.20507	2.7025	0.164111	100	6.16082
UA 1942-16	T2	76.0343	0.257442	12.9804	1.8593	0.129251	0.258502	1.36667	4.13708	2.80008	0.176925	100	5.60985
UA 1942-25	T2	76.0478	0.267058	13.2028	1.8577	0.0351112	0.198963	1.25336	4.0995	2.89295	0.144701	100	6.01285
UA 1942-2	T2	76.1886	0.261785	13.2649	2.04063	0.155569	0.260712	1.20271	3.79051	2.73908	0.095487	100	6.79363
UA 1942-18	T2	76.2174	0.282028	13.1147	1.88232	0.12499	0.215794	1.31186	3.96656	2.70811	0.176268	100	6.39235
MEAN		74.1732	0.406622	13.6593	2.49275	0.104834	0.399724	1.79433	4.2153	2.59458	0.159363	100	5.58567
STDEV		1.18856	0.0873592	0.348921	0.36007	0.0403039	0.109299	0.33919	0.23689	0.1331	0.0306379	0	0.95807
n		23	23	23	23	23	23	23	23	23	23	23	23
UA 1943-19	T2	72.9689	0.496258	13.9733	2.7884	0.0605712	0.466504	2.11361	4.48014	2.4696	0.182776	100	5.8958
UA 1943-30	T2	73.0399	0.516753	13.7404	2.98772	0.157927	0.482375	2.03156	4.34137	2.5279	0.174042	100	6.91886
UA 1943-6	T2	73.0409	0.472965	13.9323	2.78666	0.141676	0.430355	2.17095	4.40794	2.51928	0.0969364	100	6.12404
UA 1943-18	T2	73.0856	0.548409	13.8202	2.95232	0.100383	0.451196	2.04782	4.30696	2.51381	0.173293	100	5.36259
UA 1943-21	T2	73.1228	0.440796	13.7213	2.98466	0.0711646	0.449293	2.0882	4.42495	2.57148	0.125335	100	5.85204
UA 1943-22	T2	73.2448	0.404421	13.8095	2.86189	0.0693598	0.516464	2.05518	4.44116	2.42973	0.167531	100	6.28575
UA 1943-8	T2	73.2457	0.469963	13.8949	2.73086	0.149245	0.474196	1.89996	4.50698	2.49588	0.132309	100	5.5244
UA 1943-24	T2	73.3067	0.451237	13.6823	2.75768	0.0513256	0.510048	2.18241	4.54873	2.38343	0.126175	100	6.47935
UA 1943-12	T2	73.3653	0.435344	13.894	2.6917	0.131665	0.543648	2.0132	4.28654	2.46128	0.177323	100	5.8215
UA 1943-9	T2	73.427	0.392883	13.9179	2.78416	0.124236	0.482078	1.97716	4.20279	2.53888	0.152906	100	5.82444
UA 1943-1	T2	73.4868	0.413328	14.0058	2.73197	0.0253058	0.488191	2.08668	4.22291	2.37347	0.165542	100	5.16012
UA 1943-26	T2	73.5005	0.5058	13.9091	2.69939	0.0417928	0.440432	2.01999	4.31216	2.43577	0.135023	100	6.68252
UA 1943-11	T2	73.5247	0.409879	13.6044	2.67802	0.167774	0.455539	2.04621	4.45664	2.56228	0.0945058	100	5.82591
UA 1943-13	T2	73.6093	0.497546	13.7265	2.73545	0.103744	0.447792	2.01665	4.3403	2.38187	0.140795	100	5.53645
UA 1943-4	T2	73.6218	0.464865	13.8575	2.6286	0.0940295	0.473317	1.83833	4.31162	2.58	0.129951	100	5.34889
UA 1943-25	T2	73.6245	0.443208	13.7964	2.68837	0.0722505	0.416249	2.04782	4.14524	2.62798	0.138031	100	7.2671
UA 1943-27	T2	73.6577	0.52872	13.7041	2.64787	0.12685	0.445575	1.94219	4.35768	2.46665	0.122586	100	6.18857
UA 1943-3	T2	73.6793	0.45321	13.636	2.62341	0.135442	0.475089	2.06601	4.17787	2.56298	0.190661	100	4.01798
UA 1943-5	T2	73.6804	0.440748	13.8884	2.59669	0.0669087	0.471547	2.04656	4.17064	2.49899	0.139128	100	5.84179
UA 1943-7	T2	73.7541	0.384791	13.9455	2.74713	0.0996812	0.452317	2.04186	4.00976	2.44701	0.117903	100	6.70258
UA 1943-29	T2	73.8367	0.545667	13.7322	2.63546	0.0781033	0.402126	1.98425	4.10359	2.52991	0.151985	100	5.25364
UA 1943-28	T2	74.7293	0.277823	13.4929	2.34877	0.114523	0.318118	1.55878	4.27551	2.6934	0.190871	100	5.69545
UA 1943-17	T2	75.4198	0.323493	13.2708	2.11605	0.116372	0.270112	1.43704	4.25346	2.64453	0.148401	100	6.33498
UA 1943-16	T2	75.4427	0.339559	13.1477	1.97388	0.0962613	0.302535	1.30429	4.42802	2.73763	0.22743	100	5.46561
UA 1943-20	T2	76.0494	0.330122	12.9049	2.06998	0.104306	0.226892	1.32049	4.05717	2.79582	0.140866	100	7.00406
UA 1943-14	T2	76.0665	0.333673	12.9137	1.97844	0.115874	0.209216	1.35186	4.17896	2.70908	0.142696	100	6.79506
UA 1943-10	T2	76.1643	0.224482	13.0778	2.08617	0.0582791	0.191026	1.31452	3.90686	2.78121	0.195343	100	7.34238
UA 1943-23	T2	76.3394	0.245318	12.736	1.88569	0.0937052	0.166353	1.13815	4.39783	2.84064	0.156877	100	5.02126
UA 1943-15	T2	77.2307	0.160136	12.6335	1.56052	0	0.0999508	0.872689	4.16569	3.09095	0.18593	100	6.95426
MEAN	T2	74.1126	0.412117	13.5989	2.54338	0.0954743	0.39857	1.82808	4.28343	2.57488	0.152522	100	6.01819
STDEV		1.22142	0.0985692	0.401021	0.370817	0.039948	0.119433	0.361281	0.155478	0.161044	0.0306533	0	0.760083
n		29	29	29	29	29	29	29	29	29	29	29	29
MEAN	T2	74.1394	0.409687	13.6256	2.52098	0.0996142	0.399081	1.81315	4.25329	2.58359	0.155548	100	5.82688
STDEV		1.19557	0.0929186	0.376465	0.363408	0.0399863	0.113952	0.348678	0.196587	0.148252	0.0305379	0	0.871889
n		52	52	52	52	52	52	52	52	52	52	52	52
UA 1944-13	T3	65.476	1.01721	15.3745	5.37608	0.119671	1.63179	4.37916	4.7615	1.75349	0.110544	100	1.39663
UA 1944-23	T3	67.2495	0.927733	14.9487	4.89296	0.197005	1.34888	3.84461	4.68389	1.77103	0.135692	100	0.510133
UA 1944-10	T3	68.7782	0.711862	14.8082	4.25281	0.201932	1.01374	3.38593	4.81068	1.90408	0.132582	100	1.94727
UA 1944-16	T3	69.1933	0.65588	14.8045	4.33111	0.14726	1.07155	3.23971	4.4251	2.00628	0.125327	100	4.25079
UA 1944-5	T3	69.4651	0.735399	15.157	4.32255	0.147523	0.96944	3.03477	4.11291	1.9167	0.13865	100	9.84483
UA 1944-9	T3	69.6185	0.743081	14.4606	4.16731	0.154461	0.985208	3.18001	4.51902	2.07687	0.0949724	100	4.1827
UA 1944-2	T3	69.677	0.742061	14.6192	3.92412	0.170842	0.861545	3.09507	4.72068	2.06163	0.127869	100	4.59006
UA 1944-24	T3	69.7789	0.742006	14.5496	3.90333	0.191217	0.860478	2.9275	4.86461	2.02233	0.160041	100	3.77443
UA 1944-18	T3	69.8032	0.715406	14.391	4.14935	0.185901	0.929506	3.13212	4.60157	2.00731	0.0845955	100	4.25017
UA 1944-25	T3	69.8334	0.728014	14.57	3.80046	0.148936	0.910278	3.16098	4.71803	2.03719	0.0926942	100	3.98539
UA 1944-1	T3	70.0292	0.743351	14.5864	3.93018	0.187399	0.794365	3.06815	4.62564	1.9021	0.133262	100	3.94849
UA 1944-17	T3	70.1648	0.788917	14.4603	3.95089	0.116604	0.823583	3.07478	4.45092	2.05371	0.115554	100	4.8062
UA 1944-11	T3	70.2376	0.66803	14.4946	3.68049	0.121173	0.846101	3.02932	4.69202	2.05783	0.172803	100	5.09412
UA 1944-22	T3	70.2697	0.627248	14.4976	3.82935	0.181902	0.837377	2.96375	4.60296	2.11069	0.0794515	100	4.34411
UA 1944-3	T3	70.3453	0.805785	14.627	3.79168	0.107937	0.853876	2.88223	4.43289	2.02836	0.125036	100	6.42667
UA 1944-12	T3	70.4107	0.722805	14.2727	3.62768	0.136576	0.841521	2.77881	4.81064	2.28398	0.114514	100	4.81525
UA 1944-6	T3	70.4989	0.698216	14.3864	3.60623	0.154926	0.814411	2.88708	4.66454	2.1093	0.18005	100	4.47081
UA 1944-20	T3	70.5068	0.739717	14.3301	3.71011	0.138304	0.835063	2.97877	4.63109	2.00122	0.128874	100	4.55807
UA 1944-4	T3	70.6193	0.69737	14.4516	3.74756	0.165223	0.889415	2.84956	4.32477	2.11679	0.138401	100	6.79269
UA 1944-21	T3	70.7898	0.813672	14.38	3.63877	0.149191	0.774522	2.91927	4.25564	2.14687	0.132261	100	5.49012
UA 1944-7	T3	70.9827	0.726939	14.1145	3.63469	0.160615	0.791602	2.8045	4.45341	2.1756	0.1554	100	4.11845
UA 1944-14	T3	71.4148	0.76941	14.0357	3.25398	0.111265	0.785155	2.58954	4.58497	2.30403	0.151153	100	4.73218
UA 1944-15	T3	71.7047	0.763855	14.0015	3.17253	0.130826	0.646744	2.47409	4.67281	2.30634	0.126606	100	5.21759
UA 1944-8	T3	71.9505	0.685277	14.2982	3.24258	0.10412	0.708651	2.36713	4.02454	2.50206	0.116869	100	5.87749
MEAN	T3	69.9499	0.748718	14.5258	3.91403	0.151284	0.909367	3.04362	4.5602	2.06899	0.12805	100	4.55936
STDEV		1.3578	0.0827327	0.32258	0.493374	0.0295141	0.20598	0.410135	0.216062	0.168449	0.0253152	0	1.80595
n		24	24	24	24	24	24	24	24	24	24	24	24
UA 1945-12	T3	65.2443	0.942795	15.6076	5.69648	0.124213	1.64429	4.68954	4.43297	1.48852	0.129303	100	1.7814
UA 1945-2	T3	67.7446	0.789544	14.9127	4.90364	0.102852	1.22415	3.65328	4.71911	1.86143	0.0887354	100	0.828777
UA 1945-6	T3	68.7483	0.781831	14.9235	4.44542	0.107043	1.07148	3.28054	4.55981	1.9614	0.120685	100	4.71089
UA 1945-8	T3	69.1642	0.783301	14.8242	4.20553	0.15289	0.985409	3.10493	4.6841	1.94778	0.147654	100	4.50669
UA 1945-19	T3	69.4077	0.704161	14.5194	4.11058	0.0912995	1.02318	3.24166	4.85042	1.87636	0.175253	100	4.70927
UA 1945-22	T3	69.4989	0.639302	14.5557	4.04995	0.132412	0.978609	2.98445	4.91787	2.09997	0.142757	100	3.33213
UA 1945-24	T3	69.51	0.709784	14.4043	3.91845	0.160534	0.911714	3.0451	5.06844	2.13743	0.134283	100	0.955748
UA 1945-16	T3	69.5848	0.819988	14.6215	3.98831	0.110584	0.932658	3.0567	4.79265	1.96755	0.125189	100	4.14495
UA 1945-10	T3	69.6229	0.808727	14.6545	3.91229	0.114794	0.963853	3.00532	4.75928	2.02078	0.137546	100	3.3048
UA 1945-21	T3	69.7666	0.708613	14.3795	3.91932	0.13796	0.828806	3.06857	4.78993	2.24603	0.154683	100	4.3202
UA 1945-23	T3	69.811	0.646754	14.3368	3.96202	0.237246	0.82211	3.08524	4.91306	2.05682	0.128938	100	3.05439
UA 1945-5	T3	69.8519	0.738027	14.4301	4.08802	0.184769	0.947992	3.09908	4.55519	2.00622	0.0986836	100	4.74606
UA 1945-7	T3	69.915	0.818966	14.3621	3.88692	0.183634	0.723983	3.08907	4.7175	2.16773	0.135087	100	5.24643
UA 1945-1	T3	69.9705	0.628238	14.5005	3.84482	0.136118	0.799957	2.83859	5.00915	2.08052	0.191613	100	4.49484
UA 1945-13	T3	70.0909	0.855322	14.5577	3.9108	0.0898669	0.859551	2.91698	4.55678	2.07646	0.0856379	100	5.41572
UA 1945-3	T3	70.2437	0.789408	14.3566	3.78041	0.121848	0.836273	2.87749	4.73853	2.03809	0.21766	100	3.97871
UA 1945-15	T3	70.2823	0.700489	14.3038	3.81829	0.189716	0.785965	2.74671	4.82211	2.26929	0.0813067	100	4.06698
UA 1945-17	T3	70.458	0.673805	14.6336	3.6519	0.237315	0.715124	2.87639	4.54077	2.12524	0.0879337	100	5.61071
UA 1945-18	T3	70.6033	0.724958	14.5075	3.20233	0.139776	0.761467	2.87793	4.49787	2.52953	0.155423	100	4.13236
UA 1945-25	T3	70.6684	0.695254	14.407	3.76292	0.171989	0.826592	2.79248	4.39251	2.16602	0.116744	100	4.06386
UA 1945-20	T3	70.7614	0.709668	14.3199	3.66138	0.16852	0.812245	2.84181	4.5312	2.0819	0.111998	100	4.46234
UA 1945-9	T3	74.0481	0.654167	13.6501	2.69223	0.0723254	0.587239	1.97006	3.5936	2.56269	0.169479	100	7.36309
MEAN	T3	69.7726	0.741959	14.5349	3.97327	0.143987	0.911029	3.0519	4.65649	2.08035	0.133481	100	4.05592
STDEV		1.51567	0.0790385	0.352858	0.566067	0.0444378	0.213487	0.471904	0.299881	0.219724	0.0352236	0	1.47832
n		22	22	22	22	22	22	22	22	22	22	22	22
UA 1946-16	T3	64.4771	1.11666	15.5629	6.07166	0.152226	1.82262	4.75679	4.38389	1.57436	0.0817319	100	2.11895
UA 1946-10	T3	66.5008	0.911062	15.1636	5.30177	0.192906	1.35559	4.22926	4.53015	1.68793	0.126857	100	4.61684
UA 1946-4	T3	66.7098	0.837151	15.2747	5.10244	0.213111	1.45609	3.86354	4.6752	1.75486	0.113184	100	1.92926
UA 1946-6	T3	67.4038	0.836404	14.992	4.64805	0.11905	1.34822	3.84827	4.86987	1.83663	0.0976823	100	1.72217
UA 1946-25	T3	68.0074	0.787994	14.8111	4.6186	0.181923	1.14469	3.53626	4.82199	1.97867	0.111402	100	2.15657
UA 1946-23	T3	68.3298	0.898549	14.9812	4.65491	0.171347	1.10559	3.24131	4.57434	1.90215	0.140749	100	1.95307
UA 1946-17	T3	68.5283	0.744738	14.6945	4.66185	0.153085	1.10056	3.42269	4.58427	1.98183	0.12826	100	3.32164
UA 1946-22	T3	68.5601	0.824826	14.7428	4.15688	0.147363	1.13388	3.32489	4.99705	1.98941	0.122803	100	2.28239
UA 1946-19	T3	69.2381	0.752529	14.9106	4.12214	0.153021	0.988349	3.08977	4.61789	2.03749	0.0901358	100	4.58837
UA 1946-1	T3	69.7212	0.757389	14.4451	4.03656	0.158945	1.02621	3.13943	4.67661	1.93614	0.102408	100	6.25693
UA 1946-5	T3	69.833	0.658999	14.3263	3.65135	0.195221	0.871779	2.91695	5.3381	2.03587	0.172497	100	3.18646
UA 1946-15	T3	70.086	0.731489	14.5065	3.76659	0.164769	0.912	2.89657	4.86015	1.90901	0.166868	100	4.71492
UA 1946-9	T3	70.1401	0.666919	14.5906	3.59772	0.150791	0.767109	2.71828	4.98823	2.24162	0.138646	100	1.18747
UA 1946-14	T3	70.3385	0.672606	14.2981	3.73589	0.167107	0.783315	2.76876	4.96517	2.13271	0.137863	100	4.25306
UA 1946-24	T3	70.3543	0.761826	14.4196	3.65967	0.140118	0.803342	2.69753	4.76089	2.25642	0.146345	100	3.65252
UA 1946-7	T3	70.3648	0.698908	14.5359	3.54654	0.156006	0.804992	2.79043	4.80395	2.19553	0.102964	100	3.85001
UA 1946-11	T3	70.4204	0.693419	14.6578	3.56238	0.166209	0.873391	2.73133	4.72796	2.07073	0.0963377	100	5.54057
UA 1946-8	T3	70.4401	0.708657	14.4219	3.99473	0.188904	0.812181	2.904	4.37574	2.01818	0.135541	100	6.30165
UA 1946-20	T3	70.6005	0.729942	14.3778	3.67285	0.180908	0.833017	2.95974	4.42278	2.10989	0.112541	100	4.92395
UA 1946-21	T3	70.6266	0.776831	14.3961	3.61692	0.117042	0.765437	2.71269	4.61541	2.23209	0.140865	100	3.45386
UA 1946-13	T3	70.7614	0.708297	14.4556	3.80334	0.133074	0.857469	2.6647	4.41935	2.02294	0.173855	100	6.81879
UA 1946-12	T3	71.059	0.632264	14.4864	3.50801	0.148582	0.782953	2.61757	4.53649	2.13389	0.0948395	100	5.10287
UA 1946-2	T3	71.2679	0.784435	14.4962	3.48898	0.144753	0.778049	2.50019	4.37879	2.04251	0.118144	100	6.04703
UA 1946-18	T3	72.2748	0.747275	14.1978	3.27983	0.0979856	0.665441	2.40226	3.91619	2.3032	0.115214	100	7.12921
MEAN	T3	69.4185	0.768299	14.6561	4.09415	0.158102	0.991344	3.11388	4.66002	2.016	0.123656	100	4.04619
STDEV		1.79237	0.102935	0.340197	0.689498	0.0266386	0.276348	0.579584	0.28538	0.180357	0.0255146	0	1.75747
n		24	24	24	24	24	24	24	24	24	24	24	24
MEAN	T3	69.712	0.753307	14.5733	3.99441	0.151328	0.937996	3.07031	4.62469	2.05439	0.12825	100	4.22519
STDEV		1.56057	0.0885509	0.338811	0.585646	0.0340741	0.234471	0.486657	0.268851	0.189199	0.0287107	0	1.68552
n		70	70	70	70	70	70	70	70	70	70	70	70
UA 1947-16	T4	71.0445	0.688591	14.1808	3.56911	0.256513	0.621309	2.2529	4.80962	2.45895	0.117744	100	4.87821
UA 1947-21	T4	71.1031	0.785964	14.0972	3.48661	0.0994104	0.687589	2.17667	4.93842	2.43038	0.194679	100	3.43063
UA 1947-1	T4	71.1192	0.745678	14.2605	3.42367	0.16536	0.655198	2.21207	4.77775	2.47207	0.16848	100	3.84591
UA 1947-6	T4	71.1294	0.737923	14.211	3.44469	0.217593	0.674853	2.30943	4.83434	2.31258	0.128243	100	4.86815
UA 1947-18	T4	71.1673	0.704535	14.3007	3.60482	0.116896	0.616073	1.99987	5.06444	2.33792	0.0874087	100	5.04379
UA 1947-24	T4	71.195	0.647442	14.0649	3.47856	0.198325	0.617011	2.15744	5.17324	2.36416	0.103885	100	4.70186
UA 1947-9	T4	71.2935	0.682381	14.1781	3.28623	0.182799	0.650183	2.28187	4.91376	2.3795	0.15164	100	3.71944
UA 1947-14	T4	71.2956	0.67645	14.4183	3.36549	0.166495	0.672261	2.21679	4.72363	2.3393	0.125656	100	4.50137
UA 1947-10	T4	71.3038	0.663099	14.1628	3.29339	0.187352	0.645206	2.24927	4.99955	2.36716	0.12841	100	4.99152
UA 1947-25	T4	71.3217	0.626334	14.1735	3.56505	0.14024	0.633716	2.2122	4.98748	2.26809	0.0717016	100	5.16249
UA 1947-12	T4	71.3387	0.685837	14.3496	3.42919	0.158672	0.69732	2.07213	4.86663	2.30387	0.0981259	100	4.20471
UA 1947-7	T4	71.3437	0.749371	14.221	3.49011	0.189952	0.612647	2.23037	4.81768	2.22306	0.122112	100	4.18629
UA 1947-2	T4	71.3541	0.794728	14.197	3.33426	0.181773	0.656285	2.11681	4.97973	2.28062	0.104625	100	5.37642
UA 1947-17	T4	71.4035	0.821438	14.2281	3.47983	0.2308	0.671418	2.03943	4.6674	2.32164	0.136382	100	4.67932
UA 1947-23	T4	71.5015	0.74064	14.325	3.35012	0.152515	0.637222	2.1488	4.76141	2.22714	0.155649	100	4.27197
UA 1947-8	T4	71.5046	0.593483	14.1169	3.37544	0.163826	0.635728	2.13283	4.9797	2.36363	0.133946	100	2.9459
UA 1947-13	T4	71.5074	0.716591	14.3631	3.30389	0.0715569	0.615389	2.41453	4.734	2.17431	0.0991574	100	2.17578
UA 1947-4	T4	71.5446	0.688377	14.2989	3.22344	0.191808	0.626573	2.19194	4.73659	2.36137	0.136397	100	6.15614
UA 1947-5	T4	71.6151	0.675319	14.4469	3.36698	0.160281	0.600521	2.09221	4.49429	2.36148	0.186995	100	6.41456
UA 1947-20	T4	71.6463	0.6812	14.3103	3.20696	0.191588	0.608823	2.15217	4.78969	2.31608	0.0968582	100	6.04818
UA 1947-11	T4	71.6597	0.695677	14.2182	3.44238	0.152477	0.60885	2.25645	4.56902	2.30092	0.0963571	100	5.55959
UA 1947-19	T4	71.7018	0.748659	14.0441	3.39061	0.152055	0.66524	2.17206	4.63873	2.31567	0.171062	100	5.2974
UA 1947-15	T4	71.8585	0.689082	14.4597	3.42205	0.149708	0.647673	2.14582	4.26827	2.25624	0.102991	100	5.8167
MEAN	T4	71.3892	0.706035	14.2446	3.40578	0.168608	0.641612	2.18409	4.80545	2.32766	0.126891	100	4.70767
STDEV		0.217019	0.0538845	0.115848	0.105021	0.0405463	0.0274747	0.0917202	0.199508	0.0723893	0.0325452	0	1.03653
n		23	23	23	23	23	23	23	23	23	23	23	23
UA 1948-20	T4	70.6666	0.697291	14.4156	3.49694	0.150992	0.640669	2.2345	5.17122	2.42034	0.105904	100	4.57206
UA 1948-9	T4	70.8803	0.729472	14.2157	3.49851	0.175242	0.686189	2.34919	5.02904	2.29168	0.144628	100	5.22365
UA 1948-25	T4	71.006	0.575346	14.2665	3.50124	0.117161	0.610913	2.27583	5.20667	2.28555	0.15482	100	4.34678
UA 1948-5	T4	71.0388	0.631846	14.2228	3.36218	0.216543	0.607786	2.16316	5.2683	2.30868	0.17993	100	4.34605
UA 1948-16	T4	71.0448	0.637217	14.2465	3.45769	0.143113	0.692582	2.23585	5.14486	2.31169	0.0856587	100	4.21558
UA 1948-11	T4	71.0732	0.737609	14.3274	3.50914	0.164262	0.599504	2.15914	4.9385	2.37514	0.116134	100	4.37446
UA 1948-1	T4	71.079	0.706867	14.3046	3.61067	0.106657	0.653538	2.27166	4.82954	2.32344	0.113977	100	4.32526
UA 1948-12	T4	71.0869	0.781339	14.2912	3.61181	0.200178	0.627439	2.36928	4.50917	2.41079	0.111927	100	7.0566
UA 1948-23	T4	71.1095	0.63875	14.2654	3.53043	0.0964942	0.608333	2.21557	5.07912	2.33579	0.120618	100	4.60518
UA 1948-14	T4	71.1411	0.691191	14.2301	3.4549	0.157233	0.612047	2.40948	4.8368	2.3384	0.128741	100	5.19524
UA 1948-17	T4	71.1425	0.652362	14.2669	3.51183	0.169131	0.727998	2.08955	5.07317	2.28994	0.0766867	100	4.75563
UA 1948-18	T4	71.1509	0.740618	14.1885	3.43483	0.102045	0.727994	2.28111	4.97268	2.2067	0.194623	100	4.89751
UA 1948-24	T4	71.2042	0.660545	14.2218	3.34177	0.109739	0.622558	2.1885	5.21992	2.30967	0.121346	100	5.17195
UA 1948-8	T4	71.2375	0.724138	14.2214	3.40944	0.180762	0.634846	2.13665	5.04488	2.25682	0.153539	100	8.11842
UA 1948-6	T4	71.2825	0.729083	14.2699	3.33582	0.146873	0.644551	2.34368	4.86623	2.25668	0.124684	100	5.31879
UA 1948-21	T4	71.348	0.698011	14.2869	3.20064	0.158542	0.669282	2.11097	5.09111	2.33013	0.106404	100	5.96731
UA 1948-4	T4	71.4861	0.656742	14.1063	3.35819	0.148973	0.621072	2.2498	5.0107	2.1985	0.163661	100	4.63388
UA 1948-2	T4	71.4871	0.657102	14.254	3.34237	0.157957	0.647624	2.22662	4.90462	2.20781	0.114782	100	4.99468
UA 1948-22	T4	71.5455	0.563228	14.2621	3.27389	0.14028	0.687687	2.17445	4.93349	2.29599	0.123404	100	5.14547
UA 1948-7	T4	71.7445	0.573273	14.336	3.34076	0.183027	0.611141	2.11626	4.69059	2.29505	0.109395	100	4.89922
UA 1948-15	T4	72.0257	0.713993	14.4594	3.36612	0.118295	0.68442	2.12496	4.07054	2.31932	0.117239	100	5.317
Mean	T4	71.2276	0.676001	14.2695	3.42615	0.14969	0.648484	2.22506	4.9472	2.30324	0.127052	100	5.11813
StDev		0.300935	0.0593274	0.0749844	0.106682	0.0326155	0.0395146	0.0911639	0.271097	0.0586255	0.0289659	0	0.943596
n		21	21	21	21	21	21	21	21	21	21	21	21
UA 1949-7	T4	70.9235	0.79173	14.3041	3.43499	0.125721	0.662892	2.22601	5.1705	2.2649	0.0955895	100	3.69725
UA 1949-13	T4	70.9549	0.776702	14.2665	3.48719	0.167878	0.634324	2.38424	4.9306	2.24792	0.149815	100	5.83859
UA 1949-18	T4	70.9608	0.736531	14.1216	3.56148	0.109584	0.724941	2.32404	5.14856	2.20599	0.106423	100	5.04069
UA 1949-4	T4	70.9715	0.657856	14.2985	3.48539	0.119327	0.66512	2.22949	5.10945	2.32433	0.139042	100	3.57145
UA 1949-20	T4	70.9768	0.651939	14.3029	3.51462	0.18388	0.631043	2.17448	5.14562	2.34243	0.0762685	100	4.22926
UA 1949-17	T4	70.9974	0.607046	14.1791	3.37912	0.165653	0.677292	2.35481	5.19153	2.30542	0.142588	100	4.56273
UA 1949-22	T4	71.0192	0.657701	14.1861	3.46522	0.196578	0.615876	2.12102	5.20044	2.37897	0.158936	100	4.30596
UA 1949-11	T4	71.0256	0.571033	14.2131	3.46698	0.187207	0.644242	2.19839	5.22633	2.327	0.140144	100	4.32459
UA 1949-16	T4	71.0919	0.652222	14.027	3.62404	0.139912	0.64065	2.30281	5.12019	2.23088	0.170419	100	4.88742
UA 1949-21	T4	71.093	0.764706	14.4383	3.39833	0.149687	0.685524	2.23846	4.76899	2.31006	0.152941	100	7.76988
UA 1949-1	T4	71.1034	0.654016	14.1293	3.52918	0.206861	0.70103	2.42771	4.85014	2.22396	0.174474	100	4.24228
UA 1949-8	T4	71.1198	0.714767	14.2394	3.39752	0.212213	0.65881	2.31006	4.90536	2.35971	0.0823513	100	5.23988
UA 1949-19	T4	71.1282	0.715536	14.3538	3.32446	0.138694	0.647239	2.25434	5.09513	2.17973	0.162861	100	4.77323
UA 1949-24	T4	71.1636	0.651629	14.248	3.50779	0.145982	0.626241	2.27291	4.95203	2.29532	0.136461	100	5.42177
UA 1949-15	T4	71.2139	0.617018	14.2245	3.49431	0.124682	0.690549	2.1197	5.12009	2.2706	0.124682	100	6.10887
UA 1949-25	T4	71.2761	0.739533	14.1277	3.53904	0.235207	0.639981	2.25764	4.66662	2.36387	0.154252	100	8.56005
UA 1949-23	T4	71.3564	0.615082	14.2727	3.45278	0.135382	0.600158	2.10712	4.92652	2.37933	0.15457	100	6.14759
UA 1949-6	T4	71.3582	0.65262	14.2733	3.25783	0.151821	0.597796	2.32104	4.88852	2.37969	0.119137	100	5.10901
UA 1949-5	T4	71.4211	0.610985	14.3671	3.32308	0.153535	0.66672	2.23011	4.86899	2.24488	0.113574	100	4.8655
UA 1949-14	T4	71.5355	0.621785	14.0203	3.50403	0.172659	0.637674	2.09928	4.96069	2.37597	0.0720296	100	5.55059
UA 1949-9	T4	71.5509	0.595469	14.3138	3.2229	0.138124	0.631279	2.20154	4.94784	2.24672	0.151425	100	2.2158
UA 1949-2	T4	71.8003	0.620466	14.2686	3.57855	0.180306	0.681982	2.27121	4.28381	2.1705	0.144245	100	5.70241
UA 1949-3	T4	72.1165	0.7153	14.4824	3.42451	0.162617	0.629209	2.11302	4.01752	2.2241	0.114788	100	5.91202
UA 1949-12	T4	72.6489	0.688834	14.3885	3.43757	0.0737251	0.689935	2.10781	3.42645	2.3545	0.183763	100	9.14807
Mean		71.2837	0.670021	14.2519	3.45045	0.157385	0.653354	2.2353	4.87175	2.29195	0.134199	100	5.30104
StDev		0.412687	0.0612022	0.115465	0.0979897	0.0362068	0.0320851	0.0935636	0.419737	0.0672644	0.0309692	0	1.53756
n		24	24	24	24	24	24	24	24	24	24	24	24
UA 1950-21	T4	70.908	0.759994	14.2305	3.57385	0.182147	0.658452	2.25683	5.0564	2.21891	0.15493	100	4.42096
UA 1950-13	T4	70.945	0.597722	14.2486	3.42615	0.194582	0.672975	2.29651	5.23655	2.28196	0.0999787	100	6.9217
UA 1950-12	T4	70.9737	0.772583	14.3009	3.47392	0.122443	0.667477	2.22155	5.06219	2.30767	0.097521	100	7.6617
UA 1950-3	T4	70.985	0.742054	14.098	3.51719	0.182643	0.602201	2.17544	5.15705	2.36719	0.17325	100	4.12914
UA 1950-9	T4	71.0445	0.666888	14.3159	3.46845	0.197323	0.589858	2.21696	5.04681	2.34464	0.108686	100	5.18039
UA 1950-10	T4	71.0502	0.705389	14.4474	3.38064	0.141078	0.700164	2.14035	4.94755	2.35242	0.134808	100	4.26045
UA 1950-16	T4	71.0515	0.62181	14.2716	3.41892	0.192761	0.681918	2.22459	5.13265	2.29963	0.104671	100	3.45181
UA 1950-22	T4	71.1063	0.670033	14.3324	3.41822	0.167508	0.597795	2.205	5.14431	2.24224	0.116209	100	4.42664
UA 1950-5	T4	71.1067	0.640153	14.1096	3.36133	0.16686	0.602373	2.1907	5.31294	2.37603	0.133278	100	4.64816
UA 1950-25	T4	71.1167	0.618521	14.3176	3.42347	0.189666	0.662776	2.21489	4.83767	2.42798	0.190719	100	5.05476
UA 1950-1	T4	71.2337	0.695159	14.3659	3.43268	0.147235	0.718296	2.21827	4.83638	2.26824	0.0841343	100	4.87264
UA 1950-20	T4	71.2785	0.740885	14.0504	3.34191	0.164876	0.694381	2.24351	5.07698	2.33144	0.0771535	100	5.33327
UA 1950-8	T4	71.3011	0.607034	14.3243	3.48026	0.197469	0.660319	2.15616	4.9406	2.21779	0.114929	100	4.24289
UA 1950-6	T4	71.31	0.660455	14.1428	3.55021	0.163531	0.686831	2.21334	4.83683	2.33476	0.101284	100	5.17712
UA 1950-23	T4	71.3318	0.747479	14.0483	3.39996	0.127071	0.635357	2.10631	5.1619	2.27736	0.164445	100	6.29864
UA 1950-7	T4	71.3526	0.644386	14.1912	3.36862	0.181266	0.662199	2.184	4.97653	2.32395	0.115256	100	4.51389
UA 1950-17	T4	71.3908	0.670095	14.1253	3.37817	0.151277	0.647723	2.2835	4.82944	2.35967	0.164061	100	6.09398
UA 1950-11	T4	71.4068	0.680661	13.9641	3.42973	0.237809	0.611961	2.20416	5.05306	2.30076	0.110977	100	5.33795
UA 1950-18	T4	71.458	0.685898	14.2249	3.46038	0.149108	0.610279	2.17147	4.90803	2.19026	0.141653	100	6.06608
UA 1950-2	T4	71.5078	0.709325	14.1605	3.27309	0.15497	0.619879	2.14314	5.02672	2.30475	0.0998464	100	3.80388
UA 1950-24	T4	71.5142	0.659433	14.2877	3.458	0.159765	0.587593	2.24389	4.72243	2.20397	0.162982	100	6.70408
UA 1950-4	T4	71.5807	0.639503	14.2763	3.28271	0.056798	0.694197	2.13683	4.96674	2.23582	0.130425	100	4.88068
UA 1950-19	T4	71.7526	0.59823	14.276	3.5004	0.167247	0.652907	2.16249	4.50713	2.28969	0.0932724	100	6.70122
UA 1950-14	T4	71.9188	0.693447	14.004	3.38174	0.158321	0.576289	1.93433	4.968	2.26372	0.101326	100	5.21306
UA 1950-15	T4	72.8749	0.585621	13.923	3.0174	0.13083	0.425717	1.77813	4.86368	2.34466	0.0560701	100	3.65698
Mean		71.34	0.67251	14.2015	3.4087	0.163383	0.636797	2.17289	4.98434	2.29862	0.121275	100	5.16208
StDev		0.409905	0.0532891	0.134272	0.109063	0.0342187	0.0595576	0.10807	0.173271	0.0595471	0.0330376	0	1.09622
n		25	25	25	25	25	25	25	25	25	25	25	25
UA 1951-22	T4	70.8912	0.762861	14.1103	3.57296	0.173139	0.603363	2.20788	5.0904	2.42948	0.158448	100	4.64806
UA 1951-1	T4	71.095	0.620771	14.3411	3.3696	0.159864	0.589629	2.23476	5.11757	2.33471	0.137026	100	3.61312
UA 1951-2	T4	71.1502	0.705121	14.2128	3.29757	0.119797	0.649426	2.19693	5.12072	2.41087	0.136611	100	4.78532
UA 1951-18	T4	71.1915	0.637697	14.3143	3.42645	0.154467	0.71493	2.19386	4.97494	2.25311	0.138811	100	4.13866
UA 1951-15	T4	71.2035	0.685831	14.2257	3.31345	0.212481	0.644807	2.31134	5.012	2.30351	0.0873067	100	4.88426
UA 1951-6	T4	71.2221	0.589999	14.4016	3.33391	0.208173	0.64335	2.20975	5.02907	2.28768	0.074273	100	4.3562
UA 1951-5	T4	71.2243	0.739155	14.1948	3.50183	0.172398	0.599082	2.29503	4.83853	2.31525	0.119601	100	7.15184
UA 1951-12	T4	71.2486	0.641205	14.2297	3.59875	0.115817	0.6212	2.15645	4.98377	2.27294	0.13161	100	4.97539
UA 1951-24	T4	71.2971	0.711753	14.2487	3.42439	0.133322	0.672911	2.07942	5.03185	2.25678	0.14382	100	4.69283
UA 1951-4	T4	71.3032	0.644614	14.3411	3.26534	0.125753	0.601288	2.17969	5.04717	2.37245	0.119412	100	5.31958
UA 1951-25	T4	71.3532	0.706934	14.2558	3.45376	0.154376	0.605791	2.28867	4.70517	2.3507	0.12563	100	6.03937
UA 1951-10	T4	71.393	0.7093	14.2489	3.43544	0.155061	0.571002	2.22293	4.85691	2.29857	0.108962	100	4.51265
UA 1951-21	T4	71.4296	0.687647	14.2857	3.74145	0.116954	0.698477	2.24825	4.34813	2.30518	0.138612	100	7.63865
UA 1951-16	T4	71.4699	0.665056	14.2497	3.47556	0.148146	0.665056	2.23922	4.67783	2.29655	0.112974	100	6.14114
UA 1951-13	T4	71.4743	0.721728	13.9883	3.396	0.18436	0.621168	2.06839	5.10837	2.27394	0.16341	100	4.48367
UA 1951-3	T4	71.4798	0.689737	14.1591	3.56031	0.12847	0.567586	2.20259	4.82963	2.25637	0.126364	100	4.99735
UA 1951-19	T4	71.4844	0.641339	14.2051	3.35915	0.160861	0.627672	2.11525	5.10832	2.19587	0.101983	100	4.83468
UA 1951-23	T4	71.4959	0.785488	14.0467	3.29862	0.170436	0.640458	2.16928	5.01891	2.27894	0.0952748	100	5.48972
UA 1951-17	T4	71.5871	0.613011	14.1952	3.54374	0.217486	0.579962	2.20121	4.59321	2.37315	0.0959495	100	6.17295
UA 1951-8	T4	71.5983	0.608473	14.1935	3.34182	0.126367	0.688116	2.23215	4.79577	2.27539	0.140172	100	5.79297
UA 1951-11	T4	71.6743	0.693367	14.1252	3.28292	0.183911	0.594012	2.13306	4.8336	2.34749	0.13212	100	5.35101
UA 1951-20	T4	71.6793	0.731601	14.0122	3.35862	0.109635	0.651483	1.99748	5.04893	2.30853	0.102255	100	5.09216
UA 1951-14	T4	71.7564	0.795057	14.3577	3.24314	0.185477	0.749501	2.05412	4.46631	2.28932	0.103043	100	7.78345
UA 1951-9	T4	71.8115	0.695563	14.1248	3.31493	0.227819	0.65264	2.16178	4.57151	2.29089	0.148577	100	9.11347
UA 1951-7	T4	71.855	0.690516	14.1037	3.35199	0.15403	0.66432	2.04297	4.75901	2.30617	0.0722998	100	4.52974
Mean	T4	71.4147	0.686953	14.2069	3.41047	0.159944	0.636689	2.1777	4.8787	2.30735	0.120582	100	5.46153
StDev		0.238354	0.0537529	0.106174	0.122042	0.0338255	0.045912	0.0813675	0.219156	0.0517837	0.0245703	0	1.2895
n		25	25	25	25	25	25	25	25	25	25	25	25
Mean	T4	71.334	0.68222	14.2334	3.4201	0.160016	0.64316	2.19807	4.89758	2.3056	0.12588	100	5.15739
StDev		0.329374	0.05686	0.113195	0.1081	0.0355114	0.042611	0.095681	0.273173	0.062335	0.0300671	0	1.21268
n		118	118	118	118	118	118	118	118	118	118	118	118
UA 1952-7	T5	54.2161	1.26192	16.239	11.0463	0.213987	3.93276	8.70591	3.41919	0.88874	0.0759954	100	-0.0547621
UA 1952-9	T5	54.3167	1.28209	16.073	11.157	0.238273	3.92603	8.71508	3.33995	0.903092	0.048851	100	-0.348853
UA 1952-19	T5	55.2945	1.34582	16.1036	10.2787	0.229333	3.70654	8.29987	3.68942	0.979755	0.0724209	100	0.524574
UA 1952-13	T5	55.2983	1.20225	16.0745	10.4822	0.180135	3.76259	8.13672	3.9184	0.888285	0.0566716	100	1.11819
UA 1952-12	T5	55.4641	1.2476	16.0458	10.397	0.205084	3.7257	8.2278	3.64932	0.984281	0.0532817	100	0.474916
UA 1952-17	T5	55.9046	1.30966	16.3889	9.79024	0.128952	3.63281	8.11781	3.60444	1.04497	0.0775724	100	0.686159
UA 1952-15	T5	56.9383	1.27415	16.3095	9.49654	0.202935	3.3459	7.59575	3.73011	1.05535	0.0514909	100	0.900052
UA 1952-5	T5	57.0065	1.22616	16.0196	9.54047	0.242614	3.46606	7.62378	3.74508	1.03108	0.0986563	100	0.612835
UA 1952-10	T5	57.6069	1.24241	15.892	9.15722	0.149772	3.29399	7.50194	3.98454	1.0376	0.133689	100	0.454725
UA 1952-14	T5	58.5845	1.35483	16.4598	8.25949	0.170246	3.0053	6.64725	4.25384	1.174	0.09073	100	1.83464
UA 1952-11	T5	59.0274	1.10907	16.0821	8.71835	0.246573	3.05223	6.87183	3.64586	1.13496	0.111618	100	1.40889
UA 1952-21	T5	59.0639	1.14488	16.1038	8.29887	0.236421	2.85214	6.64642	4.32586	1.2151	0.112677	100	0.528026
UA 1952-24	T5	59.0737	1.15886	16.3845	8.43502	0.214005	3.0001	6.53301	3.93635	1.17972	0.0847943	100	0.881087
UA 1952-3	T5	59.379	1.35226	16.1982	8.07957	0.240047	2.83155	6.58602	4.04733	1.21806	0.0680133	100	-0.039862
UA 1952-1	T5	59.925	1.23231	16.02	7.7828	0.19844	2.79403	6.30105	4.31433	1.35563	0.0763992	100	-0.856014
UA 1952-22	T5	60.1754	1.31403	16.1822	7.22968	0.161107	2.52032	5.88548	4.66017	1.83433	0.037256	100	0.602297
UA 1952-16	T5	66.1031	0.979628	14.8159	5.80693	0.0890571	1.48057	4.04695	4.38896	2.19588	0.0931052	100	1.14408
UA 1952-20	T5	66.504	1.00186	15.0361	5.73356	0.146489	1.2344	3.66879	4.52433	2.03984	0.110635	100	2.33345
UA 1952-23	T5	67.0632	1.07687	14.9371	5.36011	0.143301	1.25073	3.48222	4.45973	2.11296	0.113798	100	5.05351
UA 1952-4	T5	67.276	0.931123	14.7338	5.1773	0.133018	1.23249	3.59476	4.76816	2.02345	0.1299	100	3.71759
UA 1952-18	T5	67.3717	0.973932	14.7311	5.22652	0.175244	1.19697	3.61781	4.49528	2.06375	0.14763	100	5.80481
UA 1952-2	T5	67.9083	0.855412	14.687	5.04445	0.117024	1.14435	3.39244	4.49621	2.25747	0.0973472	100	3.39863
UA 1952-25	T5	68.5317	0.788267	15.0777	4.61849	0.196019	1.15934	3.2155	4.25562	2.04838	0.109016	100	4.57271
UA 1952-8	T5	70.7771	0.664469	14.446	3.79727	0.151848	0.722623	2.36861	4.48967	2.3562	0.226156	100	7.11698
UA 1952-6	T5	71.548	0.707195	14.5086	3.72789	0.179184	0.68705	2.2946	3.78239	2.43672	0.128292	100	5.69059
Mean	T5	61.2143	1.12148	15.662	7.70568	0.183564	2.51826	5.9231	4.07698	1.49838	0.0962399	100	1.90237
StDev		5.63178	0.206003	0.701824	2.35854	0.0439782	1.13488	2.16154	0.410997	0.553126	0.0398435	0	2.19914
n		25	25	25	25	25	25	25	25	25	25	25	25
UA 1953-2	T5	54.9969	1.29501	16.1741	10.4624	0.233724	3.64227	8.16814	3.90588	1.01029	0.111345	100	0.24108
UA 1953-8	T5	55.9461	1.22733	15.8533	10.3243	0.198835	3.68702	7.9782	3.72608	0.991233	0.067624	100	0.868365
UA 1953-19	T5	56.0951	1.27038	16.2915	10.066	0.241737	3.74035	7.9532	3.1793	1.05218	0.110248	100	1.102
UA 1953-22	T5	56.2392	1.38473	16.1618	9.8033	0.185365	3.54899	7.89111	3.67902	1.05539	0.0511006	100	0.143774
UA 1953-6	T5	56.7624	1.16578	16.2905	9.41359	0.208175	3.49024	7.52205	4.05141	1.00341	0.0924096	100	1.45674
UA 1953-15	T5	57.6373	1.28916	16.0496	8.9491	0.224994	3.42356	7.14393	4.11651	1.08785	0.0780386	100	1.26347
UA 1953-5	T5	59.0088	1.27315	16.3624	8.18223	0.199591	2.86585	6.54053	4.23591	1.24885	0.082659	100	0.727213
UA 1953-17	T5	59.0319	1.18219	16.0284	8.37734	0.215222	2.82237	6.68373	4.3259	1.21559	0.117301	100	1.89013
UA 1953-10	T5	59.1141	1.23821	16.3474	8.26783	0.256702	2.78346	6.61618	4.03344	1.21788	0.124828	100	0.603107
UA 1953-20	T5	59.9864	1.26369	16.1254	7.70015	0.27533	2.77649	6.13627	4.3423	1.32332	0.0705974	100	0.775968
UA 1953-18	T5	60.0693	1.20125	16.0575	7.88903	0.179936	2.80559	6.4265	3.94943	1.31697	0.104544	100	0.468931
UA 1953-3	T5	60.1547	1.2001	16.2773	7.8878	0.229415	2.57964	6.09916	4.18108	1.32151	0.0693343	100	1.86241
UA 1953-21	T5	60.2379	1.18358	16.0474	7.7079	0.222614	2.58978	6.30307	4.37619	1.25906	0.072526	100	0.654709
UA 1953-11	T5	60.4278	1.23138	16.3598	7.3171	0.184046	2.62444	6.00872	4.46195	1.26382	0.121003	100	1.58026
UA 1953-9	T5	61.632	1.16769	16.3698	6.91286	0.1896	2.32535	5.32939	4.57429	1.38874	0.110349	100	0.239422
UA 1953-13	T5	67.7137	0.840091	14.7375	4.92478	0.121916	1.27141	3.38153	4.9408	1.90953	0.158798	100	2.32975
UA 1953-25	T5	70.2507	0.731164	14.2945	3.99304	0.134467	0.776336	2.42479	4.89885	2.37534	0.12081	100	4.76209
UA 1953-12	T5	70.8025	0.631182	14.3501	3.73934	0.191016	0.61042	2.31337	4.96318	2.25151	0.147414	100	3.62376
UA 1953-4	T5	70.8232	0.662853	14.2053	3.8527	0.19551	0.688991	2.21284	4.85761	2.35037	0.150553	100	4.30979
UA 1953-7	T5	70.9652	0.678955	14.3749	3.62741	0.0947379	0.687376	2.25848	4.81086	2.3379	0.164212	100	4.96002
UA 1953-23	T5	71.0241	0.635464	14.2744	3.66727	0.170644	0.618714	2.16588	4.9435	2.35663	0.143424	100	4.43267
Mean	T5	61.8533	1.08349	15.6682	7.28883	0.197789	2.39803	5.59796	4.31207	1.49226	0.108053	100	1.8236
StDev		5.74721	0.258651	0.854989	2.36767	0.043233	1.13296	2.17255	0.486606	0.520393	0.03309	0	1.60826
n		21	21	21	21	21	21	21	21	21	21	21	21
UA 1954-24	T5	53.9496	1.23045	16.2075	11.075	0.258674	3.99995	8.83825	3.43499	0.895688	0.109861	100	-0.176563
UA 1954-4	T5	56.1152	1.24565	16.2545	10.1416	0.2355	3.54052	7.72208	3.53697	1.09174	0.116247	100	0.165178
UA 1954-21	T5	56.9484	1.2566	16.3788	9.3496	0.237735	3.35427	7.47255	3.80985	1.14333	0.0489455	100	-0.169314
UA 1954-22	T5	58.1879	1.23109	15.9338	9.17338	0.213054	3.00386	6.98708	3.96845	1.26219	0.0391939	100	0.436427
UA 1954-13	T5	58.5102	1.43788	16.245	8.41667	0.149864	3.1198	6.74004	4.12824	1.18948	0.0627808	100	1.17779
UA 1954-9	T5	58.9285	1.44213	16.3516	8.34402	0.198985	2.98067	6.34907	4.13981	1.12976	0.135392	100	2.44049
UA 1954-25	T5	59.556	1.23955	16.2063	7.64471	0.167344	2.83783	6.36056	4.63102	1.22838	0.128264	100	0.119132
UA 1954-16	T5	59.8119	1.2229	16.3208	7.79888	0.23024	2.71037	6.2205	4.35265	1.23081	0.100983	100	0.900745
UA 1954-8	T5	59.9145	1.17732	16.7016	7.83737	0.143379	2.60303	6.26896	4.03123	1.23067	0.0918837	100	0.903015
UA 1954-2	T5	60.7912	1.10519	16.4535	7.24689	0.225813	2.62022	5.77324	4.45104	1.2384	0.0945031	100	-0.600922
UA 1954-14	T5	60.8573	1.21593	16.045	7.55374	0.196411	2.59688	5.93762	4.17849	1.3457	0.072895	100	1.16916
UA 1954-15	T5	61.1278	1.23483	16.2385	6.62967	0.214798	2.54644	5.64704	4.88715	1.40111	0.0726369	100	3.54054
UA 1954-7	T5	61.2166	1.28831	16.0741	7.18577	0.152615	2.46364	5.75344	4.34486	1.41464	0.106037	100	-0.974441
UA 1954-10	T5	61.6033	1.14241	16.0127	7.4417	0.213825	2.57593	6.00598	3.58217	1.40985	0.0120465	100	0.357712
UA 1954-5	T5	68.2017	0.884189	14.7728	4.69405	0.171606	1.13427	3.24668	4.54793	2.2589	0.0878957	100	4.39108
UA 1954-11	T5	70.0954	0.742307	14.1633	4.00039	0.117877	0.695581	2.71743	4.25191	3.10643	0.109381	100	5.81653
UA 1954-19	T5	70.642	0.695726	14.2128	3.71436	0.203398	0.633142	2.29953	5.20748	2.2392	0.152288	100	4.06905
UA 1954-3	T5	70.8431	0.681623	14.4134	3.61841	0.174369	0.667885	2.28706	4.97916	2.20291	0.132097	100	5.32379
UA 1954-6	T5	70.9964	0.664536	14.7325	3.65964	0.156484	0.614461	2.20909	4.4798	2.35257	0.134576	100	4.11565
UA 1954-18	T5	74.4665	0.431363	13.4079	2.46416	0.0700966	0.376365	1.53841	3.61077	3.51263	0.12186	100	7.30045
UA 1954-20	T5	75.7506	0.303078	13.1296	1.55406	0.101374	0.229921	1.02749	4.12392	3.60437	0.175576	100	4.32837
Mean	T5	63.2626	1.04157	15.536	6.64496	0.182545	2.15738	5.11439	4.22276	1.73756	0.100254	100	2.12542
StDev		6.43951	0.326627	1.09504	2.62974	0.0488106	1.18004	2.27698	0.478624	0.821682	0.0392665	0	2.41579
n		21	21	21	21	21	21	21	21	21	21	21	21
Mean	T5	62.0566	1.08453	15.6245	7.24256	0.187703	2.36747	5.56771	4.19636	1.57143	0.101201	100	1.94759
StDev		5.90366	0.262941	0.876145	2.45209	0.045155	1.14115	2.19406	0.460952	0.640865	0.037428	0	2.08006
n		67	67	67	67	67	67	67	67	67	67	67	67
UA 1955-25	T6	70.4521	0.682402	14.1012	4.1575	0.120919	0.655064	2.55442	4.7167	2.4587	0.100941	100	4.85755
UA 1955-15	T6	70.5131	0.738603	13.9061	4.00024	0.124153	0.693361	2.60947	4.71872	2.55104	0.145195	100	4.91954
UA 1955-7	T6	70.5672	0.640131	13.8657	3.93943	0.184694	0.609699	2.6081	4.90952	2.5486	0.126977	100	4.66261
UA 1955-6	T6	70.6358	0.625839	13.8972	4.18141	0.132978	0.633227	2.75635	4.62209	2.39797	0.117147	100	5.21604
UA 1955-5	T6	70.7274	0.630652	14.1078	4.09228	0.124203	0.601743	2.55127	4.61511	2.44571	0.10386	100	6.57347
UA 1955-3	T6	70.748	0.672783	14.0281	4.08057	0.0992459	0.605922	2.56719	4.79336	2.28985	0.114916	100	4.2386
UA 1955-19	T6	70.7573	0.584022	13.9596	4.1099	0.131509	0.593342	2.55103	4.80816	2.37877	0.126331	100	3.38813
UA 1955-16	T6	70.7984	0.645456	13.9757	3.99866	0.0804175	0.596783	2.54319	4.71645	2.56343	0.0814757	100	5.45809
UA 1955-18	T6	70.8573	0.718661	13.9231	4.21324	0.105092	0.643292	2.63058	4.32779	2.44924	0.131631	100	5.77992
UA 1955-17	T6	70.8646	0.646603	13.8182	3.96866	0.0795003	0.638123	2.58834	4.67655	2.53395	0.185501	100	5.62848
UA 1955-1	T6	70.8681	0.633802	13.9053	3.91692	0.11618	0.679444	2.59313	4.75264	2.41729	0.117217	100	3.56077
UA 1955-12	T6	70.8844	0.583419	13.7657	4.20956	0.170341	0.649426	2.74523	4.43131	2.43929	0.121368	100	6.05002
UA 1955-11	T6	70.8968	0.61027	13.8466	4.18882	0.0745531	0.61027	2.55651	4.67049	2.43489	0.110765	100	6.07526
UA 1955-13	T6	70.9139	0.605708	13.9991	4.05041	0.14825	0.698894	2.45407	4.48092	2.48252	0.166252	100	5.54082
UA 1955-2	T6	70.952	0.619517	14.0358	3.85396	0.152529	0.593399	2.68522	4.63884	2.3706	0.0982034	100	4.24846
UA 1955-20	T6	70.9773	0.604196	14.0585	4.09348	0.139028	0.60106	2.4377	4.62268	2.37721	0.0888523	100	4.30453
UA 1955-8	T6	71.1336	0.609681	13.9532	4.29864	0.125685	0.626218	2.32204	4.23954	2.51056	0.18081	100	9.28491
UA 1955-14	T6	71.2025	0.756177	14.1263	4.26518	0.070095	0.624483	2.81998	3.5852	2.41099	0.139128	100	5.85844
UA 1955-24	T6	71.2071	0.607296	13.8836	4.03159	0.138506	0.636062	2.53095	4.36185	2.43791	0.165142	100	6.12411
UA 1955-23	T6	71.218	0.612815	13.8312	4.12238	0.0596083	0.670332	2.38888	4.57104	2.41073	0.115034	100	4.34895
UA 1955-4	T6	71.2251	0.66581	13.7874	3.78344	0.0767837	0.579559	2.45179	4.7832	2.50176	0.145153	100	4.89185
UA 1955-22	T6	71.348	0.61492	13.9329	4.13451	0.127444	0.611734	2.65492	3.94994	2.4685	0.157182	100	5.84282
UA 1955-21	T6	71.4417	0.70223	14.1713	3.99796	0.0908147	0.708566	2.6015	3.78516	2.42159	0.0791989	100	5.30972
UA 1955-9	T6	71.495	0.706137	14.0135	3.94419	0.121931	0.673269	2.52198	3.85483	2.49204	0.177064	100	5.6899
UA 1955-10	T6	71.5429	0.612012	13.8246	3.83395	0.100261	0.576503	2.55021	4.38272	2.42538	0.151436	100	4.23325
Mean	T6	70.9691	0.645166	13.9487	4.05867	0.115789	0.632391	2.57096	4.48059	2.44874	0.129871	100	5.28345
StDev		0.303928	0.0479416	0.111384	0.135261	0.0319189	0.0379792	0.112216	0.350881	0.0647043	0.0306765	0	1.17939
n		25	25	25	25	25	25	25	25	25	25	25	25
UA 1956-1	T6	70.568	0.725376	14.0014	3.94756	0.133191	0.653658	2.51873	4.7495	2.56326	0.139338	100	2.35663
UA 1956-5	T6	70.576	0.656132	13.9884	4.11078	0.143594	0.602677	2.60388	4.73058	2.37941	0.208579	100	4.55538
UA 1956-2	T6	70.5807	0.673803	13.892	3.91804	0.11334	0.680042	2.67478	4.76211	2.52012	0.185088	100	3.79119
UA 1956-4	T6	70.6162	0.691159	13.9973	4.06509	0.122274	0.63624	2.64084	4.64929	2.42824	0.153361	100	3.46189
UA 1956-11	T6	70.6672	0.635122	14.0011	4.08413	0.129338	0.682441	2.70817	4.4865	2.4504	0.155626	100	4.87462
UA 1956-14	T6	70.6956	0.611754	13.9187	4.11914	0.128625	0.658812	2.65641	4.53124	2.50299	0.176729	100	4.34609
UA 1956-7	T6	70.7177	0.743256	13.9699	4.03274	0.159269	0.698494	2.53109	4.53432	2.45192	0.161351	100	3.90855
UA 1956-10	T6	70.7263	0.672095	14.0037	4.17329	0.147021	0.680496	2.73834	4.44774	2.29233	0.118667	100	4.75166
UA 1956-16	T6	70.7278	0.668719	13.7723	4.14459	0.135423	0.660321	2.70153	4.60561	2.40845	0.175316	100	4.71361
UA 1956-15	T6	70.7717	0.621258	14.0647	3.83965	0.182292	0.628592	2.5419	4.75127	2.45083	0.147719	100	4.5109
UA 1956-9	T6	70.8197	0.680762	13.7285	4.04576	0.20769	0.622021	2.70803	4.55309	2.50224	0.132166	100	4.63891
UA 1956-18	T6	70.894	0.633724	13.9545	3.98012	0.157908	0.681828	2.53403	4.60572	2.43064	0.127581	100	4.34465
UA 1956-13	T6	70.904	0.650118	13.939	3.96322	0.137525	0.610527	2.52244	4.65875	2.46026	0.154195	100	3.98485
UA 1956-3	T6	70.9135	0.591269	13.8572	4.13157	0.117	0.589179	2.61144	4.58103	2.46056	0.147295	100	4.24519
UA 1956-23	T6	70.9169	0.608106	13.9465	4.10655	0.119731	0.705781	2.67555	4.36954	2.40111	0.150189	100	4.76724
UA 1956-25	T6	70.9247	0.586608	13.9999	4.1157	0.194137	0.586608	2.76245	4.32604	2.33593	0.167902	100	4.68891
UA 1956-6	T6	70.9546	0.663392	13.967	4.09513	0.138997	0.677081	2.55925	4.37392	2.40947	0.16111	100	5.01434
UA 1956-17	T6	70.9941	0.718802	13.8521	4.12525	0.173937	0.601446	2.50213	4.55517	2.32192	0.155077	100	4.53651
UA 1956-21	T6	70.9953	0.649825	14.0061	4.28716	0.123425	0.674088	2.41853	4.20268	2.47945	0.163511	100	5.19378
UA 1956-12	T6	71.099	0.675277	13.7863	4.16543	0.122113	0.576125	2.67613	4.38084	2.42065	0.0981083	100	4.16917
UA 1956-24	T6	71.1385	0.648802	13.88	4.11775	0.1031	0.618601	2.50303	4.3989	2.41221	0.179123	100	3.9573
UA 1956-20	T6	71.1503	0.682473	14.0466	4.08752	0.130642	0.605133	2.3593	4.46419	2.3338	0.140048	100	4.29534
UA 1956-22	T6	71.1542	0.569711	14.082	4.1057	0.0956526	0.628574	2.34452	4.49378	2.36722	0.15872	100	4.83947
UA 1956-19	T6	71.6028	0.63015	13.8782	3.88326	0.140744	0.576838	2.45335	4.34394	2.35527	0.135413	100	6.1979
UA 1956-8	T6	71.7045	0.65189	14.1208	4.12899	0.109881	0.67936	2.78021	3.36917	2.28404	0.171161	100	5.38008
Mean	T6	70.9125	0.653583	13.9462	4.07096	0.138674	0.640599	2.58904	4.477	2.41691	0.154535	100	4.46097
StDev		0.288149	0.0426177	0.0972651	0.100517	0.0276615	0.0403609	0.121476	0.273999	0.0713042	0.0229589	0	0.713225
n		25	25	25	25	25	25	25	25	25	25	25	25
Mean	T6	70.9408	0.649374	13.9474	4.06482	0.127231	0.636495	2.58	4.47879	2.43282	0.142203	100	4.87221
StDev		0.294496	0.0450935	0.103499	0.118103	0.0317394	0.0390072	0.116098	0.311572	0.0692773	0.0295681	0	1.05025
n		50	50	50	50	50	50	50	50	50	50	50	50
UA 2014-1	T7	76.8943	0.076881	12.7612	0.720082	0.0714668	0.126691	0.594681	4.42553	4.18952	0.139685	100	7.64945
UA 2014-10	T7	76.8289	0.123105	13.1613	0.797456	0.115479	0.103495	0.615428	3.91647	4.22504	0.1133	100	8.20814
UA 2014-11	T7	77.3278	0.173699	12.9595	0.744424	0.104651	0.0733635	0.666007	3.59805	4.19075	0.161831	100	7.31089
UA 2014-12	T7	77.0571	0.169762	12.6852	0.65983	0.0907534	0.137732	0.606506	4.22804	4.24874	0.116378	100	6.33955
UA 2014-13	T7	77.1242	0.130189	12.8436	0.706896	0.110822	0.098987	0.596538	4.0165	4.19476	0.177531	100	7.05849
UA 2014-14	T7	77.0327	0.190601	12.8435	0.706408	0.104454	0.0753789	0.644436	3.73233	4.56791	0.1023	100	7.13578
UA 2014-15	T7	77.1185	0.11298	12.813	0.798392	0.110828	0.093612	0.6507	4.09741	4.03887	0.165704	100	7.06323
UA 2014-16	T7	77.0665	0.144867	12.8186	0.722204	0.138476	0.111846	0.626304	4.11273	4.10933	0.149128	100	6.12073
UA 2014-17	T7	77.3753	0.0959016	12.7645	0.742705	0.109754	0.121475	0.589671	4.00762	4.02368	0.169426	100	6.1538
UA 2014-18	T7	77.3616	0.0951574	12.8279	0.683403	0.04866	0.137329	0.593859	3.88523	4.25223	0.114621	100	7.52162
UA 2014-2	T7	76.4648	0.153836	12.9126	0.65594	0.137812	0.128197	0.659483	4.2369	4.48805	0.162383	100	6.39389
UA 2014-20	T7	77.4091	0.0737695	12.9321	0.739833	0.0555944	0.0908754	0.691361	3.56873	4.3178	0.120811	100	6.46536
UA 2014-21	T7	77.3015	0.0961745	12.9125	0.711473	0.0568304	0.12459	0.561262	3.41747	4.67284	0.145355	100	8.49966
UA 2014-22	T7	77.2369	0.109513	12.9996	0.726475	0.119272	0.0889118	0.632985	4.0585	3.92487	0.103008	100	7.77378
UA 2014-23	T7	77.0529	0.155922	12.9899	0.655948	0.0957039	0.0698961	0.620989	3.98945	4.21871	0.150545	100	7.00484
UA 2014-24	T7	76.9005	0.116826	12.8508	0.621642	0.0825283	0.0911026	0.66613	3.82845	4.68229	0.159698	100	6.69864
UA 2014-25	T7	77.3788	0.181051	12.7339	0.691873	0.127167	0.141177	0.653977	4.00144	3.9494	0.141177	100	7.20839
UA 2014-3	T7	77.3206	0.101494	12.7958	0.77416	0.065863	0.109052	0.658608	3.98957	4.01864	0.166277	100	7.38349
UA 2014-4	T7	77.4498	0.115671	12.8231	0.736584	0.0469231	0.13204	0.599297	3.51269	4.45728	0.126583	100	8.36077
UA 2014-6	T7	77.6054	0.117619	12.9586	0.747797	0.0841676	0.106828	0.6797	3.22642	4.30727	0.166177	100	7.32774
UA 2014-7	T7	77.1314	0.12932	12.7236	0.6466	0.0459567	0.0790883	0.63176	4.07305	4.39387	0.145351	100	6.43369
UA 2014-8	T7	77.1095	0.125345	12.7231	0.692078	0.0803496	0.143558	0.647874	4.19211	4.13079	0.155343	100	6.65793
UA 2014-9	T7	77.4421	0.0987007	12.7719	0.694195	0.116247	0.121731	0.57125	3.17487	4.83243	0.176565	100	8.81522
Mean	T7	77.1735	0.125582	12.8524	0.712017	0.0921634	0.108998	0.628644	3.88216	4.27979	0.144747	100	7.19935
StDev		0.253959	0.032606	0.112347	0.046273	0.0291674	0.0232451	0.035229	0.327737	0.243552	0.0235843	0	0.761619
n		23	23	23	23	23	23	23	23	23	23	23	23
UA 2015-1	T7	77.2741	0.228447	12.6382	0.626627	0.0843332	0.105683	0.623188	4.16328	4.1237	0.132371	100	6.32392
UA 2015-10	T7	77.2152	0.155862	12.8936	0.755663	0.102117	0.0892177	0.650042	3.52356	4.46748	0.147263	100	6.96916
UA 2015-11	T7	77.395	0.152766	12.893	0.805	0.13218	0.109428	0.550733	3.6588	4.17419	0.12893	100	7.70187
UA 2015-12	T7	77.2494	0.0900775	12.9336	0.703462	0.0943669	0.106163	0.638378	3.87655	4.21362	0.0943669	100	6.74698
UA 2015-13	T7	77.3023	0.102469	12.8302	0.758274	0.0819755	0.0916831	0.627416	3.9715	4.1446	0.0895259	100	7.28939
UA 2015-14	T7	77.3947	0.15685	12.8054	0.731243	0.12548	0.13197	0.687037	3.72545	4.04929	0.192546	100	7.5547
UA 2015-15	T7	77.6036	0.158019	12.7308	0.749248	0.111796	0.0881469	0.565574	3.76559	4.08	0.14727	100	6.97343
UA 2015-16	T7	77.6007	0.113615	12.9229	0.697923	0.0486923	0.109287	0.63508	3.88456	3.87033	0.116862	100	7.58292
UA 2015-17	T7	77.6244	0.168805	12.9756	0.668811	0.0790607	0.112181	0.63042	3.17098	4.39452	0.175216	100	6.40109
UA 2015-18	T7	77.3518	0.178875	12.9728	0.647614	0.078662	0.122842	0.614375	3.91694	3.95776	0.158402	100	7.19785
UA 2015-19	T7	77.6234	0.128405	12.8503	0.704051	0.0837897	0.116435	0.663767	3.31133	4.3792	0.139287	100	8.10328
UA 2015-2	T7	77.5522	0.120539	12.8901	0.662965	0.0796419	0.144216	0.600086	3.58819	4.26519	0.0968617	100	7.08406
UA 2015-20	T7	77.9519	0.172247	13.037	0.698678	0.0322964	0.113037	0.607026	3.13059	4.08711	0.170094	100	7.1103
UA 2015-21	T7	77.5395	0.101511	12.7434	0.694551	0.118608	0.122882	0.609231	3.81576	4.1124	0.142116	100	6.41436
UA 2015-22	T7	77.3669	0.173606	12.8886	0.755506	0.0632267	0.112522	0.652555	3.37888	4.45169	0.156459	100	6.68504
UA 2015-23	T7	77.438	0.143849	12.8891	0.771161	0.083281	0.0919336	0.587188	3.44481	4.41228	0.138441	100	7.54195
UA 2015-24	T7	77.2686	0.11031	12.6857	0.699345	0.0556906	0.116736	0.622965	4.26997	4.00687	0.163859	100	6.62691
UA 2015-25	T7	77.2831	0.156028	12.8836	0.729563	0.0850081	0.115138	0.667648	3.90822	4.00169	0.170016	100	7.06767
UA 2015-3	T7	76.8945	0.0699452	12.9463	0.669321	0.0764016	0.105456	0.674432	3.93522	4.47343	0.154955	100	7.07005
UA 2015-4	T7	76.8256	0.164509	12.9671	0.656959	0.0365575	0.0913937	0.606278	3.9138	4.5808	0.156982	100	6.99573
UA 2015-5	T7	77.2409	0.136535	12.877	0.731744	0.110935	0.0746677	0.623823	3.90085	4.15211	0.151469	100	6.25131
UA 2015-6	T7	77.2465	0.159783	12.8995	0.707765	0.120106	0.0793554	0.608043	3.86911	4.19397	0.115816	100	6.74866
UA 2015-7	T7	77.4573	0.156625	12.9794	0.683749	0.0604896	0.108017	0.6736	3.51056	4.22228	0.147984	100	7.42218
UA 2015-8	T7	76.9339	0.101637	12.9358	0.770305	0.0941484	0.101637	0.613352	4.01521	4.31098	0.123035	100	6.5305
UA 2015-9	T7	77.0861	0.121735	12.8888	0.726102	0.0614062	0.121735	0.659391	3.72531	4.50053	0.108808	100	7.17557
Mean	T7	77.3488	0.140922	12.8783	0.712225	0.08401	0.107271	0.627665	3.735	4.22504	0.140757	100	7.02276
StDev		0.252914	0.0348049	0.0955597	0.0440121	0.0267568	0.0162057	0.0336945	0.290916	0.190938	0.0264932	0	0.470185
n		25	25	25	25	25	25	25	25	25	25	25	25
Mean	T7	77.2648	0.133572	12.8659	0.712126	0.0879168	0.108098	0.628134	3.80551	4.25127	0.142669	100	7.10737
StDev		0.265867	0.0342958	0.103644	0.0446252	0.0279417	0.0196924	0.0340722	0.314664	0.217131	0.0249565	0	0.626384
n		48	48	48	48	48	48	48	48	48	48	48	48
		548

## Sheet: Table S2
Table S2. Similarity coefficient (SC) used to compare data from Alaskan and Lake El-Gygytgyn tephra.
Tephra	Highest SC	Most similar Alaskan tephra
T0	0.92	Halfway House tephra1,2
T1	0.96	Alyeska Pipeline, Gold Run2,3
T2	0.92	PAL, Aniakchak2,4
T3	0.92	P102
T4	0.9	VT and GI1,5
T5 pop.1	0.87	Aniakchak4
T5 pop.2	0.93	VT1,2
T5 all	0.86	Aniakchak4
T6	0.93	VT1,2
T7	0.89	P132
1- Preece et al., 1999; 2- Jensen et al., 2013
3- Westgate et al., 2011b; 4- Kaufman et al., 2012
5- Jensen et al., 2008, 2011

## Sheet: Table S3
Table S3. Electron probe data on volcanic glass from El'gygtgyn tephra layers analysed at GEOMAR, Kiel
Sample ID	Layer	SiO2	TiO2	Al2O3	FeO	MnO	MgO	CaO	Na2O	K2O	P2O5	F	SO3	Cl	Total	Original total
T0-4	T0	73.3772	0.418611	13.651	2.64152	0.129084	0.482957	2.12244	5.10031	1.8372	0.0818364	0	0.0164873	0.141349	100	98.9486
T0-4	T0	72.1132	0.497243	14.1387	2.87154	0.190907	0.62885	2.5526	4.9572	1.70733	0.12453	0.0499922	0.0193452	0.148551	100	97.7009
T0-4	T0	71.9531	0.509038	14.3634	2.94636	0.148463	0.65615	2.618	4.79868	1.7232	0.0718404	0.0695602	0.0128966	0.129372	100	97.9643
T0-4	T0	72.126	0.494137	14.1579	3.10957	0.047444	0.611238	2.48479	4.92521	1.73694	0.102677	0.0559414	0.00667655	0.141523	100	98.3345
T0-4	T0	72.3741	0.493427	13.9768	2.89592	0.143636	0.524291	2.40595	5.06574	1.7623	0.105145	0.112568	0	0.140105	100	98.6189
T0-4	T0	72.4376	0.493276	14.0476	2.84471	0.132076	0.544581	2.3924	5.06079	1.78525	0.0910557	0	0.0205226	0.15016	100	97.912
T0-4	T0	73.3154	0.509995	13.7089	2.73016	0.126434	0.444672	2.1543	4.94436	1.85586	0.0534967	0	0	0.156392	100	97.9558
T0-4	T0	72.5466	0.516447	13.9798	2.93566	0.0906564	0.545833	2.49553	4.89509	1.73727	0.121696	0	0	0.135378	100	98.3156
T0-4	T0	74.3773	0.424269	13.1928	2.67604	0.0644116	0.372031	1.85756	4.92554	1.88895	0.0463871	0.0206526	0.00572547	0.148351	100	97.2954
T0-4	T0	72.689	0.514645	14.0306	2.83731	0.10339	0.484327	2.35707	4.89515	1.79445	0.0577994	0.0906682	0.00191837	0.143676	100	98.5269
T0-4	T0	71.6823	0.565914	14.4136	2.99557	0.0920215	0.621995	2.62757	5.03716	1.70584	0.081701	0	0.0256851	0.150571	100	98.3715
T0-4	T0	73.7628	0.482118	13.4381	2.62695	0.112242	0.498335	2.10054	4.80705	1.89374	0.0573251	0.0463853	0.0135588	0.16087	100	97.5789
T0-4	T0	72.2682	0.500837	14.1962	2.73011	0.133144	0.596833	2.54733	5.01032	1.79132	0.0829673	0	0.0104822	0.132237	100	98.6971
T0-4	T0	71.7725	0.545881	14.3148	3.11464	0.173605	0.624676	2.49091	4.99966	1.70363	0.0804677	0	0.0276717	0.151589	100	98.499
T0-4	T0	73.2237	0.537761	13.3923	3.01214	0.185216	0.436876	2.20385	4.94792	1.81514	0.10148	0.0135327	0	0.130075	100	98.4947
T0-4	T0	72.5984	0.492953	13.9392	2.75117	0.139827	0.49423	2.29208	5.11454	1.8727	0.0955715	0.0411316	0	0.168257	100	98.6739
T0-4	T0	72.2134	0.496963	14.1308	2.85565	0.185902	0.584263	2.5796	4.97121	1.71822	0.0543668	0.0476906	0.00759405	0.154311	100	98.2449
T0-4	T0	72.1755	0.46394	14.0711	2.92768	0.216895	0.574009	2.46664	5.08534	1.78946	0.0747187	0.0118472	0	0.142875	100	98.239
T0-4	T0	73.1767	0.475159	13.7305	2.80257	0.103924	0.470205	2.17745	4.95781	1.86958	0.0458085	0.0561615	0	0.13418	100	98.3052
MEAN	T0	72.6412	0.496453	13.9407	2.85817	0.132594	0.53665	2.36456	4.97364	1.78886	0.0805721	0.032428	0.00887179	0.145254	100	98.2462
STDEV		0.716899	0.0358155	0.338622	0.14401	0.0445158	0.0780949	0.211428	0.0906489	0.0659537	0.0241097	0.0344816	0.00941623	0.0106147	0	0.420116
n		19	19	19	19	19	19	19	19	19	19	19	19	19	19	19
T1-2	T1	77.3977	0.224284	12.3974	1.283	0.0765177	0.201487	1.21809	4.1416	2.76261	0	0.152931	0	0.144418	100	95.8379
T1-2	T1	77.7065	0.223443	12.3458	1.16748	0.0919421	0.171677	1.16678	4.1258	2.73892	0.0320691	0.0676138	0.00621373	0.155659	100	94.4788
T1-2	T1	77.523	0.236131	12.3224	1.28855	0.0648602	0.216474	1.19045	4.11996	2.85188	0.0140472	0	0.0227217	0.14955	100	96.3398
T1-2	T1	77.9581	0.241079	12.2023	1.06978	0.0991871	0.209348	1.1423	4.1269	2.75362	0.0236757	0	0.014815	0.158973	100	94.6987
T1-2	T1	77.5982	0.217793	12.2879	1.24455	0.0228981	0.19888	1.21122	4.1816	2.84515	0	0.0185067	0.00679625	0.166456	100	95.1623
T1-2	T1	77.5628	0.21171	12.3183	1.08795	0.0732579	0.196635	1.23078	4.26663	2.79232	0.0228547	0.0631927	0.0124518	0.161043	100	95.8899
T1-2	T1	77.5324	0.225542	12.5435	1.17318	0.0984412	0.226473	1.1498	4.13971	2.70925	0.00278144	0.0141233	0.0270871	0.157675	100	94.409
T1-2	T1	77.4529	0.251027	12.4664	1.21197	0.0570319	0.241356	1.19486	4.05899	2.83723	0.0043231	0.0361514	0.0223349	0.165382	100	95.7843
T1-2	T1	77.716	0.248357	12.5061	0.902644	0.0804174	0.231303	1.17446	4.19885	2.74796	0.0248931	0	0.0103153	0.15873	100	94.5336
T1-2	T1	77.496	0.235915	12.2981	1.17305	0.0866363	0.18081	1.19475	4.33019	2.75423	0.0353004	0.0245314	0.0226683	0.167787	100	96.1256
T1-2	T1	77.5674	0.215796	12.2556	1.21236	0.0820364	0.197495	1.24826	4.31265	2.7179	0.0212394	0	0.0106189	0.158555	100	95.5714
T1-2	T1	77.7913	0.215123	12.2621	1.13163	0.076222	0.197688	1.25663	4.14811	2.73563	0.0201593	0	0	0.165442	100	95.6856
T1-2	T1	77.569	0.203766	12.4503	1.11344	0	0.203977	1.197	4.45418	2.64656	0	0	0.00187523	0.159915	100	95.5062
T1-2	T1	77.5024	0.209787	12.5635	1.17166	0.00304868	0.19356	1.20234	4.1936	2.75508	0.00661563	0	0.0334303	0.164944	100	94.6509
T1-2	T1	77.4308	0.238043	12.5746	1.05492	0.0538928	0.166844	1.23831	4.19536	2.80476	0.00484827	0.0918981	0	0.145687	100	95.8255
T1-2	T1	77.4878	0.237623	12.361	1.04041	0.0814932	0.222655	1.21175	4.48751	2.65784	0.0180874	0.00854532	0.00885795	0.17643	100	95.4758
T1-2	T1	77.6694	0.226882	12.2909	1.2335	0.00983078	0.180776	1.1492	4.22538	2.80383	0.00881057	0.0450752	0	0.156456	100	95.1394
T1-2	T1	77.8229	0.215875	12.2469	1.08066	0.0791077	0.21032	1.20367	4.2389	2.73905	0.0132049	0	0.0030426	0.14636	100	94.8358
T1-2	T1	77.562	0.174356	12.3774	1.14163	0.0745245	0.213077	1.22892	4.35889	2.67704	0	0	0.0212027	0.170987	100	94.7932
T1-2	T1	77.4172	0.191188	12.4934	1.05536	0.0291668	0.251796	1.18736	4.33061	2.81319	0.0525238	0	0.0215353	0.156602	100	95.1792
T1-2	T1	77.5866	0.224121	12.2693	1.04665	0.0609749	0.230191	1.16485	4.24271	2.87384	0.0206298	0.112306	0.025821	0.141964	100	95.9514
T1-2	T1	77.5473	0.212312	12.2703	1.06752	0.0505949	0.211768	1.18855	4.31078	2.78629	0	0.166285	0.0154393	0.172857	100	95.3799
T1-2	T1	77.3835	0.205069	12.3818	1.17263	0.0475505	0.252906	1.19107	4.42444	2.66072	0.0175408	0.0817995	0.00617947	0.174806	100	94.9974
T1-2	T1	77.6724	0.225237	12.3127	1.09355	0.0269482	0.193063	1.21436	4.27935	2.69535	0.0599198	0.0879747	0.00031457	0.13883	100	94.8904
T1-2	T1	77.6033	0.22816	12.2422	1.18601	0.0814896	0.162976	1.21566	4.26947	2.82225	0.0137321	0.0200316	0.00314632	0.151548	100	94.871
T1-2	T1	77.1601	0.2319	12.2855	1.30366	0.0362437	0.204398	1.2055	4.55115	2.80023	0.0366813	0	0.0190096	0.165656	100	95.2548
MEAN	T1	77.566	0.221943	12.3587	1.14261	0.0593967	0.206459	1.19911	4.2582	2.76087	0.0174591	0.0381141	0.0121491	0.15895	100	95.2795
STDEV		0.159451	0.0171101	0.108658	0.0927512	0.02933	0.02379	0.0295341	0.123921	0.0628895	0.0159949	0.0499116	0.0100804	0.0102095	0	0.545601
n		26	26	26	26	26	26	26	26	26	26	26	26	26	26	26
T1-3	T1	77.5955	0.227752	12.4637	1.08185	0.0333053	0.205454	1.16112	4.26356	2.75222	0.0183722	0.049234	0	0.147909	100	96.1997
T1-3	T1	77.519	0.218567	12.3552	1.21847	0.0653567	0.178724	1.16498	4.22948	2.83526	0	0.0523488	0.00116331	0.161488	100	94.0859
T1-3	T1	77.5903	0.238815	12.228	1.21392	0.00936305	0.19968	1.19958	4.34728	2.80989	0	0.00441852	0.00778501	0.150966	100	94.5752
T1-3	T1	77.7318	0.20129	12.3735	1.13905	0.0549305	0.223666	1.20629	4.05057	2.7685	0.0502439	0.00532273	0.0242716	0.17054	100	93.4702
T1-3	T1	77.4507	0.221081	12.347	1.23584	0.168033	0.179007	1.17858	4.14045	2.84734	0.0470788	0	0.0188695	0.16603	100	94.3896
T1-3	T1	77.7502	0.227654	12.4418	1.30273	0.0615147	0.169885	1.13221	4.11565	2.64415	0	0.02054	0	0.133668	100	94.4645
T1-3	T1	77.4644	0.238205	12.2061	1.30854	0.149683	0.197219	1.19097	4.33914	2.72407	0.00712328	0	0.0105794	0.163928	100	94.9871
T1-3	T1	77.3571	0.241457	12.3328	1.16335	0	0.200793	1.23487	4.37298	2.88311	0	0.0594321	0	0.154122	100	94.2536
T1-3	T1	77.8892	0.219801	12.1813	1.13046	0.0636297	0.204891	1.17376	4.04746	2.88198	0.0175652	0	0.0199436	0.169996	100	94.2949
T1-3	T1	77.2148	0.233393	12.583	1.20058	0.0441997	0.232598	1.18009	4.35832	2.78846	0.00989777	0	0	0.154646	100	93.8731
T1-3	T1	77.468	0.237202	12.3682	1.21962	0.0309146	0.189871	1.18597	4.25913	2.82964	0.0245477	0	0.0190325	0.167822	100	94.6245
T1-3	T1	77.4721	0.205678	12.3173	1.17526	0.0652616	0.171862	1.19501	4.22729	2.91125	0.0207604	0.0772807	0.000843446	0.160149	100	94.3754
T1-3	T1	77.4696	0.253921	12.2705	1.19249	0.0131017	0.226499	1.22923	4.24725	2.83268	0.0450423	0.0416296	0.012996	0.165039	100	94.1686
T1-3	T1	77.0738	0.222688	12.5787	1.23279	0.0188491	0.197047	1.24951	4.24807	2.95125	0.0369666	0.0111817	0.0150154	0.164104	100	93.4358
T1-3	T1	77.5422	0.227228	12.3036	1.28311	0.0886445	0.170477	1.15169	4.28402	2.73627	0.00602698	0.0395507	0	0.167216	100	93.8364
T1-3	T1	77.6696	0.226265	12.3889	0.970418	0.105051	0.214541	1.23586	4.04291	2.91827	0	0.0572813	0.0152186	0.155674	100	94.1532
T1-3	T1	77.6724	0.230912	12.4253	1.26148	0.0456856	0.165285	1.20532	4.00536	2.80396	0	0	0.0199005	0.16434	100	93.0016
T1-3	T1	77.5822	0.221606	12.2063	1.34513	0	0.20451	1.15142	4.39703	2.70176	0.0049074	0.0161863	0.00409913	0.164806	100	94.6607
T1-3	T1	77.5673	0.197789	12.4238	1.26182	0.0483259	0.219292	1.13679	4.14954	2.78936	0.0304307	0.0219092	0.00241106	0.151268	100	94.9188
T1-3	T1	77.7144	0.234368	12.3632	1.00614	0.000636567	0.229586	1.2007	4.11283	2.87632	0.0544891	0.0388306	0	0.168478	100	93.7869
T1-3	T1	77.4646	0.263987	12.1727	1.27901	0.0679436	0.192049	1.15155	4.34617	2.79861	0.0196426	0.0841407	0.00778301	0.151874	100	94.5991
T1-3	T1	77.5459	0.213011	12.3276	1.00507	0.0215993	0.184414	1.16161	4.20195	3.01931	0.0603966	0.0663862	0.0199053	0.172795	100	93.9775
T1-3	T1	77.7147	0.189702	12.3307	0.950313	0.118615	0.202627	1.19082	4.19218	2.92437	0.0263361	0	0	0.1596	100	93.9543
T1-3	T1	77.4704	0.241944	12.5937	0.949003	0.0682533	0.199063	1.13428	4.32531	2.81664	0.0355236	0.000949427	0	0.164989	100	94.8478
T1-3	T1	77.6439	0.207845	12.4331	1.13842	0.0811874	0.177394	1.16746	4.07183	2.84646	0.0333974	0.032559	0.0106079	0.155758	100	95.2703
T1-3	T1	77.4184	0.246746	12.431	1.23132	0.028129	0.24124	1.22028	4.04337	2.88646	0.0397246	0.0368082	0.00805179	0.16846	100	95.6889
T1-3	T1	77.496	0.229724	12.4306	1.09789	0.0572531	0.207804	1.18673	4.09282	3.00976	0.00205798	0.0316563	0.00480591	0.152953	100	95.7706
T1-3	T1	77.6682	0.231515	12.3511	1.07671	0.0681759	0.205053	1.19534	4.15784	2.83642	0.0323194	0	0.0215348	0.155786	100	95.2517
T1-3	T1	77.6089	0.243477	12.3487	1.28088	0.0283322	0.201827	1.18208	4.23232	2.67346	0.0199068	0	0.0140069	0.166067	100	94.2942
T1-3	T1	77.5825	0.22919	12.3532	1.18543	0.0669292	0.225769	1.16962	4.17271	2.82098	0.0235302	0	0.00666169	0.163524	100	96.1286
T1-3	T1	77.6876	0.223128	12.4181	1.22665	0	0.203835	1.20298	4.0944	2.76346	0.000496617	0	0.0166245	0.16275	100	94.4948
T1-3	T1	77.5725	0.280361	12.274	1.20931	0.127154	0.202067	1.14619	4.25206	2.71625	0.0186207	0.0540168	0.00658231	0.140841	100	95.7662
T1-3	T1	77.3572	0.200251	12.3786	1.28508	0.0706133	0.181801	1.18297	4.26599	2.8896	0.0406022	0.00208607	0.00271189	0.142478	100	95.9305
T1-3	T1	77.3794	0.230446	12.3798	1.23834	0.0397025	0.229206	1.17859	4.26324	2.82854	0.0216175	0.0314268	0.0160277	0.163629	100	95.5145
T1-3	T1	77.8663	0.209534	12.2845	1.12372	0.052509	0.212557	1.16034	4.05009	2.78291	0.0521102	0.0561847	0.00651112	0.14272	100	95.2829
T1-3	T1	77.8415	0.215963	12.3799	1.16239	0.0498681	0.187956	1.19742	4.02095	2.7467	0.0136761	0	0.0204966	0.163233	100	94.708
T1-3	T1	77.4324	0.199852	12.6446	1.09689	0.0551308	0.197692	1.22884	4.19636	2.77748	0.00148033	0	0.0045241	0.164761	100	95.1003
T1-3	T1	77.5967	0.24961	12.3364	0.909188	0	0.232299	1.23151	4.25938	2.89623	0.0407449	0.0683046	0.0242371	0.15539	100	95.3633
T1-3	T1	77.3771	0.191142	12.4143	1.27129	0.0896927	0.218888	1.18215	4.35998	2.72405	0.00855079	0	0.0136216	0.149208	100	95.4903
T1-3	T1	77.5718	0.209095	12.4246	1.17043	0.0984098	0.193155	1.17438	4.16498	2.70069	0.037709	0.0756918	0.0182163	0.160806	100	95.5771
T1-3	T1	77.7148	0.20737	12.3726	1.15156	0.102584	0.200686	1.16546	4.08404	2.81494	0.0170153	0	0	0.168993	100	95.9792
T1-3	T1	77.4721	0.182635	12.4049	1.20874	0.0302332	0.192488	1.20338	4.24681	2.78268	0	0.0864104	0.0176796	0.171984	100	95.6448
T1-3	T1	77.8935	0.253141	12.3564	1.06652	0	0.222317	1.14844	4.02288	2.75209	0.0296054	0.0781086	0.00977686	0.167269	100	94.1585
T1-3	T1	77.8189	0.201852	12.3904	1.13415	0.0404627	0.217037	1.19857	4.05275	2.775	0.0122208	0	0	0.158673	100	94.4655
T1-3	T1	77.8159	0.220877	12.3889	1.12343	0.0555036	0.168609	1.20545	4.14221	2.66451	0.0336585	0	0.00996757	0.171022	100	95.3674
MEAN	T1	77.5735	0.224401	12.3729	1.167	0.0552171	0.201749	1.18512	4.19002	2.81185	0.0220977	0.0266639	0.0096103	0.15995	100	94.7596
STDEV		0.174394	0.0202838	0.100576	0.10467	0.0399059	0.01941	0.0289375	0.112045	0.0850118	0.01758	0.0294002	0.00799014	0.00909557	0	0.7857
n		45	45	45	45	45	45	45	45	45	45	45	45	45	45	45
MEAN	T1	77.5707	0.223501	12.3677	1.15806	0.0567476	0.203474	1.19024	4.21499	2.79318	0.0203991	0.0308569	0.01054	0.159584	100	94.95
STDEV		0.167959	0.0190943	0.103065	0.100493	0.0362262	0.0210752	0.0297317	0.120291	0.081037	0.0170499	0.0382608	0.00882822	0.00945851	0	0.746984
n		71	71	71	71	71	71	71	71	71	71	71	71	71	71	71
T2-1	T2	75.1883	0.295128	13.3751	2.05658	0.00498669	0.234809	1.35087	4.51293	2.68863	0.0343301	0.085099	0	0.173233	100	91.783
T2-1	T2	72.71	0.452359	13.8523	2.81873	0.184879	0.494544	1.97303	4.65732	2.46103	0.0671258	0.143255	0.0219742	0.163433	100	94.1712
T2-1	T2	72.561	0.483902	13.9827	2.66555	0.112908	0.469758	1.99213	4.93247	2.42636	0.0775432	0.115124	0.0270134	0.153533	100	94.2794
T2-1	T2	72.8166	0.42246	13.8581	2.70401	0.0955094	0.465708	2.00755	4.87915	2.53826	0.0427275	0	0.034798	0.135173	100	94.0575
T2-1	T2	72.6906	0.458082	13.9865	2.89397	0.147691	0.499432	2.0104	4.6024	2.48603	0.0580175	0	0.00548996	0.161362	100	92.4211
T2-1	T2	72.7169	0.468377	13.9139	2.72612	0.0538493	0.429418	1.97582	4.8695	2.46451	0.0685092	0.133089	0.0166097	0.163346	100	94.0361
T2-1	T2	72.8107	0.408607	13.7759	2.83082	0.0946847	0.469705	1.93059	4.89583	2.48702	0.0688434	0.0484919	0.0223648	0.156449	100	95.1905
T2-1	T2	72.9128	0.443261	13.7498	2.72031	0.110226	0.462039	2.03319	4.82413	2.45834	0.0659441	0.0377311	0.0180177	0.164173	100	93.8637
T2-1	T2	75.2172	0.27852	13.0991	2.12238	0.0519844	0.208697	1.32382	4.66876	2.81147	0	0	0.0426864	0.175395	100	94.1639
T2-1	T2	72.8766	0.439087	13.9065	2.68843	0.130178	0.45919	1.9825	4.90276	2.40648	0.061404	0.00211157	0.00168926	0.143059	100	94.2273
T2-1	T2	72.7927	0.449665	13.8982	2.8107	0.102723	0.44031	1.9901	4.78482	2.47163	0.0840386	0	0	0.175184	100	93.3607
T2-1	T2	73.1616	0.465048	13.9448	2.71106	0.105257	0.438083	1.90423	4.30646	2.61759	0.0748406	0.0887869	0.0225785	0.159685	100	91.2177
T2-1	T2	72.7115	0.459576	13.8295	2.80771	0.119965	0.461208	2.00804	4.87591	2.45141	0.0333249	0.0778717	0.00757671	0.156375	100	94.5364
T2-1	T2	72.6888	0.473232	14.0286	2.78618	0.0457377	0.424997	2.02635	4.8187	2.40764	0.0449227	0.0767928	0.0198584	0.158233	100	94.1836
T2-1	T2	75.5287	0.293398	13.1865	1.75932	0.080298	0.226799	1.26148	4.68713	2.76498	0.0300834	0	0.0138735	0.167428	100	94.6668
T2-1	T2	72.9172	0.443345	14.1984	2.40771	0.185999	0.442979	1.98381	4.65735	2.46933	0.0590784	0.0700182	0	0.164843	100	92.6487
T2-1	T2	72.6726	0.417454	13.7509	2.89227	0.0712737	0.470925	2.03632	4.86012	2.49157	0.0576599	0.118473	0.002323	0.158175	100	94.2139
T2-1	T2	73.1281	0.452563	13.7016	2.63514	0.0702913	0.467567	1.94775	4.84736	2.523	0.0677946	0	0	0.158924	100	93.8337
T2-1	T2	72.7494	0.455218	13.6745	2.7739	0.0990649	0.446608	2.06012	4.86202	2.57655	0.0566799	0.071617	0.0163005	0.158062	100	94.5955
T2-1	T2	72.4762	0.462822	13.9474	2.74345	0.150484	0.508599	2.0344	4.85954	2.54499	0.0742716	0.0550396	0	0.142742	100	93.8092
T2-1	T2	72.6863	0.408204	13.7226	2.8391	0.0988398	0.485229	2.08517	4.84583	2.55745	0.0907477	0	0.0111103	0.16938	100	94.911
T2-1	T2	74.8355	0.300407	13.4665	2.0968	0.0571296	0.252817	1.41674	4.65092	2.67132	0.0513165	0.0421848	0	0.158352	100	93.8716
T2-1	T2	72.3715	0.483268	14.0563	2.80478	0.117764	0.437314	2.0136	5.00813	2.47939	0.045413	0.0275416	0	0.155014	100	94.2758
T2-1	T2	72.4551	0.461745	13.8234	2.97217	0.0789976	0.449553	1.98598	4.97656	2.44795	0.129885	0.0823459	0.00387141	0.13236	100	95.0742
T2-1	T2	72.6888	0.450848	13.8631	2.62232	0.123615	0.4183	2.01004	5.10658	2.41756	0.0693993	0.0655596	0.00218879	0.161658	100	95.4452
T2-1	T2	73.0776	0.41681	13.7189	2.50073	0.137028	0.452651	2.03218	4.94354	2.4427	0.0930867	0	0.0334767	0.151345	100	92.4194
MEAN	T2	73.1324	0.424746	13.7812	2.63039	0.101206	0.42374	1.89908	4.80139	2.52166	0.0618072	0.051582	0.0124539	0.158343	100	93.8945
STDEV		0.920161	0.0613705	0.255088	0.300478	0.0419896	0.0869603	0.247797	0.169426	0.108063	0.0246878	0.0464281	0.0127055	0.0108251	0	1.03179
n		26	26	26	26	26	26	26	26	26	26	26	26	26	26	26
T2-2	T2	74.7924	0.297019	13.1899	2.09559	0.068784	0.21323	1.36443	4.84646	2.85461	0.0729499	0.0167169	0	0.187932	100	93.4385
T2-2	T2	73.1175	0.458925	13.9034	2.5383	0.133656	0.45506	1.99693	4.63717	2.50158	0.0880167	0	0	0.169476	100	93.0461
T2-2	T2	72.5538	0.482272	13.9811	2.83422	0.142023	0.494996	1.98386	4.73722	2.52788	0.072562	0.0197579	0.0128533	0.157426	100	93.6557
T2-2	T2	72.7153	0.493204	13.9206	2.68914	0.0902935	0.461455	2.03662	4.79604	2.48134	0.0454488	0.0997981	0.0133064	0.157459	100	94.204
T2-2	T2	72.0546	0.418752	13.9109	3.18087	0.181707	0.389264	2.08248	4.98276	2.46159	0.0537173	0.133413	0	0.149932	100	94.5484
T2-2	T2	72.7564	0.446872	13.7283	2.84489	0.0476194	0.47904	2.00853	4.94648	2.51825	0.060793	0	0.00656089	0.156192	100	94.0069
T2-2	T2	75.0039	0.289487	13.3145	1.96576	0.0304033	0.226555	1.32304	4.70847	2.70884	0.0656304	0.172143	0.014024	0.177281	100	92.9405
T2-2	T2	72.7591	0.439945	13.9575	2.70328	0.116325	0.468368	1.98774	4.69579	2.56815	0.0509426	0.0795117	0.0248273	0.148536	100	92.9676
T2-2	T2	72.7106	0.471141	13.8123	2.87549	0.0680259	0.465519	2.08442	4.78088	2.50238	0.0276836	0.0359382	0.0128351	0.152844	100	93.0097
T2-2	T2	73.0446	0.446401	13.9514	2.55357	0.0800606	0.427025	1.87857	4.81384	2.52743	0.0356391	0.0638792	0	0.177572	100	94.0703
T2-2	T2	72.9908	0.457763	14.0191	2.62092	0.0982147	0.468425	2.01543	4.58614	2.47617	0.0419339	0.0483601	0.0151592	0.161627	100	93.1957
T2-2	T2	72.3632	0.467177	14.1353	2.9779	0.147831	0.469793	1.96467	4.63416	2.48821	0.0682237	0.1155	0	0.168039	100	93.5462
T2-2	T2	72.9594	0.456634	13.7717	2.69123	0.11348	0.485518	2.0408	4.71611	2.50512	0.043594	0.0580033	0.00642141	0.152009	100	94.5054
T2-2	T2	72.7402	0.431527	13.7671	2.90899	0.0931383	0.472785	2.03731	4.80132	2.47398	0.0791209	0.022196	0.022196	0.150168	100	93.6726
T2-2	T2	72.7008	0.447325	13.8464	2.78733	0.149256	0.421215	2.00271	4.87186	2.44989	0.0719253	0.0478427	0.0314001	0.172064	100	93.7805
T2-2	T2	74.7802	0.310604	13.3562	2.29842	0.118361	0.239735	1.40983	4.51555	2.66821	0.0368575	0.0748489	0.0086812	0.182517	100	93.9812
T2-2	T2	75.1078	0.259772	13.1915	2.04028	0.122018	0.252164	1.27266	4.76938	2.72986	0.0559072	0.0154216	0	0.183288	100	96.0122
T2-2	T2	73.8519	0.350651	13.954	2.213	0.0308661	0.396849	1.76945	4.65621	2.52916	0.0774034	0	0.0114435	0.159055	100	95.2866
T2-2	T2	72.7144	0.433823	14.0728	2.91718	0.107388	0.493455	1.98605	4.4883	2.4001	0.0551782	0.143677	0.0269792	0.160606	100	94.5495
T2-2	T2	73.0917	0.467812	13.9697	2.33113	0.0490134	0.510805	2.02163	4.74721	2.4492	0.0570685	0.136598	0	0.168137	100	93.8798
T2-2	T2	75.5156	0.295583	13.3054	1.95232	0.0462406	0.229067	1.33847	4.34607	2.71199	0.0164279	0.0587352	0	0.184108	100	93.6855
T2-2	T2	72.9337	0.473247	13.986	2.81951	0.134563	0.472821	1.96292	4.60227	2.39793	0.0207228	0.0355171	0.0175471	0.143231	100	94.631
T2-2	T2	72.7043	0.463418	14.0136	2.6863	0.13487	0.400828	1.99294	4.94635	2.42498	0.0718258	0	0	0.160604	100	95.2293
MEAN	T2	73.3027	0.415624	13.7852	2.58807	0.10018	0.408434	1.8505	4.72287	2.53725	0.0551988	0.0599069	0.00974934	0.164352	100	93.9932
STDEV		0.99826	0.0732068	0.294632	0.349693	0.0417889	0.100209	0.282312	0.154469	0.117786	0.0193329	0.0517386	0.0099287	0.0129793	0	0.802044
n		23	23	23	23	23	23	23	23	23	23	23	23	23	23	23
MEAN	T2	73.2123	0.420464	13.7831	2.61053	0.100725	0.416555	1.87628	4.76454	2.52898	0.0587053	0.0554896	0.0111844	0.161164	100	93.9408
STDEV		0.951369	0.0666266	0.271444	0.321757	0.0414603	0.0927398	0.262888	0.165694	0.111815	0.0223573	0.048654	0.0114508	0.0121419	0	0.922921
n		49	49	49	49	49	49	49	49	49	49	49	49	49	49	49
T3-1	T3	70.8922	0.693489	14.3399	3.15061	0.0711215	0.669383	2.22697	5.34484	2.34143	0.0844529	0.0288302	0.0199268	0.136837	100	94.9163
T3-1	T3	70.4545	0.657697	14.1404	3.44105	0.168968	0.679762	2.20337	5.57235	2.35788	0.148198	0.0300574	0.0114803	0.134215	100	95.9501
T3-1	T3	70.1946	0.682093	14.3609	3.51453	0.199962	0.661148	2.25513	5.42828	2.31551	0.105382	0.123726	0.0209544	0.137836	100	95.5122
T3-1	T3	70.424	0.676503	14.3454	3.62008	0.116209	0.58976	2.20092	5.35101	2.33584	0.144662	0.0315785	0.0389468	0.125156	100	96.9713
T3-1	T3	70.677	0.708578	14.5642	3.42689	0.145251	0.61222	2.14288	5.05308	2.32127	0.103715	0.104399	0.0158341	0.124667	100	95.7735
T3-1	T3	70.6662	0.721789	14.2231	3.27214	0.165394	0.650999	2.24334	5.52731	2.31484	0.0600014	0.0146994	0.00719105	0.133035	100	97.2017
T3-1	T3	70.8753	0.695029	14.3811	3.26512	0.201128	0.638676	2.07787	5.18084	2.30986	0.120602	0.0875847	0.0390438	0.127895	100	98.7342
T3-1	T3	70.2151	0.644636	14.5957	3.65662	0.108132	0.767627	2.71956	4.76338	2.12454	0.151734	0.111959	0.0257304	0.115255	100	95.2963
T3-1	T3	67.7323	0.646834	16.8817	3.11504	0.0683846	0.37357	3.96178	5.09962	1.8917	0.140722	0	0	0.0883692	100	96.3098
T3-1	T3	69.251	0.748325	14.4381	4.07006	0.104604	0.847465	2.86752	5.21002	2.04583	0.165442	0.103449	0.0128129	0.135376	100	94.5413
T3-1	T3	69.7891	0.695563	14.4368	3.93688	0.075194	0.823423	2.74332	5.03422	2.14365	0.117418	0.0452216	0.0331274	0.126095	100	95.287
T3-1	T3	69.5597	0.736862	14.7276	3.8222	0.148481	0.808756	3.02921	4.77377	2.06156	0.150923	0	0.04265	0.138216	100	95.4843
T3-1	T3	73.3137	0.555363	13.5141	2.46031	0.075095	0.478921	1.84616	4.73266	2.7769	0.0703915	0.0457378	0.00723295	0.123386	100	95.6746
T3-1	T3	69.3842	0.714423	14.491	4.057	0.178411	0.849366	2.87921	4.86485	2.14158	0.177948	0.0882989	0.0295396	0.144179	100	97.9599
T3-1	T3	69.0067	0.715257	14.3975	4.19373	0.203237	0.893445	2.93176	5.22376	2.04913	0.185997	0.0353729	0.0335938	0.130503	100	95.1072
T3-1	T3	69.9555	0.762931	14.7174	4.0349	0.172454	0.955403	3.02499	3.97047	2.07667	0.158678	0	0.0171817	0.153469	100	95.598
T3-1	T3	69.5653	0.705413	14.4696	4.20839	0.124555	0.810277	2.78174	4.89749	2.12013	0.165714	0.00586517	0.0175955	0.127861	100	97.3352
T3-1	T3	68.6289	0.772361	14.8093	4.27549	0.142739	1.03362	3.13836	4.86305	1.94574	0.140366	0.085453	0.0374849	0.127068	100	97.249
T3-1	T3	69.972	0.659702	14.4231	3.65628	0.152391	0.783639	2.84402	5.09274	2.11274	0.126448	0	0.0164578	0.160411	100	96.3481
T3-1	T3	68.0598	0.810585	14.8076	4.27261	0.0771277	1.02234	3.26529	5.17972	2.02782	0.242785	0.0771277	0.043841	0.113357	100	94.5966
T3-1	T3	69.6516	0.685056	14.2601	3.66505	0.14693	0.868613	2.89716	5.30043	2.1046	0.152448	0.0633011	0.0571922	0.147562	100	95.3214
T3-1	T3	69.8571	0.694808	14.4957	3.78776	0.101022	0.860792	2.7502	4.99735	2.06729	0.133829	0.0812868	0.0302959	0.142519	100	92.8869
T3-1	T3	65.1835	0.972909	15.3223	5.16163	0.217864	1.50826	4.16236	5.12086	1.76764	0.329477	0.0670585	0.0661426	0.119973	100	95.3935
T3-1	T3	67.8946	0.804789	14.8206	4.57518	0.192074	1.06942	3.19598	5.02841	1.9786	0.210935	0.0936499	0.028034	0.107769	100	96.8057
T3-1	T3	70.0645	0.681128	14.2126	3.70566	0.175018	0.836733	2.78593	5.03849	2.21111	0.0981962	0.0366316	0.0155502	0.138386	100	95.1606
T3-1	T3	69.4711	0.703465	14.548	3.72789	0.177222	0.869778	2.7387	5.28348	2.09787	0.14887	0.0954354	0.0128087	0.125462	100	96.0715
T3-1	T3	69.7485	0.745512	14.529	3.79798	0.12697	0.83897	2.79371	5.03734	2.10721	0.106718	0	0.0325862	0.135512	100	94.5554
T3-1	T3	68.7753	0.74999	14.4538	4.19668	0.152997	0.982072	3.12271	5.29435	1.96206	0.138834	0	0.0565423	0.114644	100	95.6478
MEAN	T3-1	69.6165	0.715753	14.561	3.78814	0.142462	0.813729	2.77965	5.08086	2.14682	0.145746	0.0520258	0.027492	0.129822	100	95.8461
STDEV		1.39527	0.0722709	0.547107	0.519935	0.0447372	0.213028	0.525582	0.309806	0.192958	0.0534641	0.0408598	0.016287	0.014505	0	1.19548
n		28	28	28	28	28	28	28	28	28	28	28	28	28	28	28
T3-2	T3	70.2151	0.644636	14.5957	3.65662	0.108132	0.767627	2.71956	4.76338	2.12454	0.151734	0.111959	0.0257304	0.115255	100	93.558
T3-2	T3	67.7323	0.646834	16.8817	3.11504	0.0683846	0.37357	3.96178	5.09962	1.8917	0.140722	0	0	0.0883692	100	95.5887
T3-2	T3	69.251	0.748325	14.4381	4.07006	0.104604	0.847465	2.86752	5.21002	2.04583	0.165442	0.103449	0.0128129	0.135376	100	94.7003
T3-2	T3	69.7891	0.695563	14.4368	3.93688	0.075194	0.823423	2.74332	5.03422	2.14365	0.117418	0.0452216	0.0331274	0.126095	100	94.578
T3-2	T3	69.5597	0.736862	14.7276	3.8222	0.148481	0.808756	3.02921	4.77377	2.06156	0.150923	0	0.04265	0.138216	100	93.9895
T3-2	T3	69.3842	0.714423	14.491	4.057	0.178411	0.849366	2.87921	4.86485	2.14158	0.177948	0.0882989	0.0295396	0.144179	100	93.2712
T3-2	T3	69.0067	0.715257	14.3975	4.19373	0.203237	0.893445	2.93176	5.22376	2.04913	0.185997	0.0353729	0.0335938	0.130503	100	95.0334
T3-2	T3	69.2683	0.732642	14.5967	3.77955	0.141364	0.841579	2.84658	5.32433	2.05747	0.138232	0.116217	0.0235952	0.133499	100	96.1099
T3-2	T3	69.5653	0.705413	14.4696	4.20839	0.124555	0.810277	2.78174	4.89749	2.12013	0.165714	0.00586517	0.0175955	0.127861	100	93.2712
T3-2	T3	68.6289	0.772361	14.8093	4.27549	0.142739	1.03362	3.13836	4.86305	1.94574	0.140366	0.085453	0.0374849	0.127068	100	93.9308
T3-2	T3	69.972	0.659702	14.4231	3.65628	0.152391	0.783639	2.84402	5.09274	2.11274	0.126448	0	0.0164578	0.160411	100	95.49
T3-2	T3	68.0598	0.810585	14.8076	4.27261	0.0771277	1.02234	3.26529	5.17972	2.02782	0.242785	0.0771277	0.043841	0.113357	100	98.0008
T3-2	T3	69.6516	0.685056	14.2601	3.66505	0.14693	0.868613	2.89716	5.30043	2.1046	0.152448	0.0633011	0.0571922	0.147562	100	94.4289
T3-2	T3	69.8571	0.694808	14.4957	3.78776	0.101022	0.860792	2.7502	4.99735	2.06729	0.133829	0.0812868	0.0302959	0.142519	100	93.2423
T3-2	T3	65.1835	0.972909	15.3223	5.16163	0.217864	1.50826	4.16236	5.12086	1.76764	0.329477	0.0670585	0.0661426	0.119973	100	97.7227
T3-2	T3	67.8946	0.804789	14.8206	4.57518	0.192074	1.06942	3.19598	5.02841	1.9786	0.210935	0.0936499	0.028034	0.107769	100	97.9164
T3-2	T3	70.0645	0.681128	14.2126	3.70566	0.175018	0.836733	2.78593	5.03849	2.21111	0.0981962	0.0366316	0.0155502	0.138386	100	95.305
T3-2	T3	69.4711	0.703465	14.548	3.72789	0.177222	0.869778	2.7387	5.28348	2.09787	0.14887	0.0954354	0.0128087	0.125462	100	94.7365
T3-2	T3	69.7485	0.745512	14.529	3.79798	0.12697	0.83897	2.79371	5.03734	2.10721	0.106718	0	0.0325862	0.135512	100	94.3187
T3-2	T3	68.7753	0.74999	14.4538	4.19668	0.152997	0.982072	3.12271	5.29435	1.96206	0.138834	0	0.0565423	0.114644	100	95.6843
T3-2	T3	69.6449	0.691852	14.4881	4.0249	0.140385	0.788934	2.86264	4.89763	2.11337	0.153172	0.040516	0.0199949	0.133545	100	94.5166
T3-2	T3	69.4488	0.719316	14.5146	3.80435	0.141201	0.863319	2.96633	5.17494	2.04047	0.126627	0.0245112	0.0325769	0.142982	100	94.9524
T3-2	T3	69.8512	0.708823	14.6505	3.66025	0.139769	0.845285	2.89959	4.89165	2.06105	0.0876322	0.0596742	0.0116386	0.132891	100	94.0128
T3-2	T3	69.553	0.68704	14.4312	3.81492	0.274752	0.882123	2.8387	5.02486	2.06148	0.178402	0.106842	0.019064	0.127582	100	94.957
MEAN	T3	69.149	0.726137	14.6584	3.95692	0.146284	0.877891	3.00093	5.05903	2.05394	0.157036	0.0557446	0.029119	0.129542	100	94.9715
STDEV		1.07574	0.0676207	0.523717	0.393668	0.0475494	0.185786	0.360102	0.168295	0.0931443	0.0502381	0.0406961	0.0159244	0.0148881	0	1.36629
n		24	24	24	24	24	24	24	24	24	24	24	24	24	24	24
T3-3	T3	70.0095	0.708053	14.4876	3.38756	0.20917	0.81065	2.86701	5.10168	2.12982	0.118837	0	0.0331816	0.136927	100	94.7267
T3-3	T3	70.0509	0.684691	14.4487	3.58716	0.157952	0.750565	2.74007	5.19764	2.07286	0.10466	0.0546268	0.00571675	0.144401	100	93.9548
T3-3	T3	69.5862	0.696296	14.6258	3.5612	0.109514	0.868877	2.96559	5.05252	2.07896	0.168015	0.117817	0.0327911	0.136419	100	94.6411
T3-3	T3	70.9301	0.605286	14.3445	3.36836	0.055231	0.746163	2.57074	4.86555	2.19053	0.100237	0.0482074	0.0357565	0.139301	100	93.4749
T3-3	T3	68.9607	0.741376	14.5313	4.20416	0.0674718	0.908997	3.07543	5.04818	2.03874	0.157365	0.0823614	0.059142	0.124844	100	95.5201
T3-3	T3	69.7739	0.686663	14.3572	3.94449	0.182362	0.817282	2.76681	5.00362	2.07936	0.14188	0.0603295	0.0407832	0.145383	100	94.1397
T3-3	T3	69.3982	0.701982	14.6695	3.94051	0.134316	0.767769	2.78858	5.22189	2.07163	0.103316	0.0227369	0.0377895	0.14179	100	94.4911
T3-3	T3	68.1262	0.776414	14.7539	4.4811	0.172883	1.0025	3.13834	5.13789	2.03195	0.208006	0	0.043349	0.127479	100	96.8192
T3-3	T3	69.9764	0.686719	14.3434	3.69972	0.165795	0.819373	2.80292	5.05622	2.06376	0.135867	0.0742021	0.0505924	0.125005	100	94.3681
T3-3	T3	69.2381	0.666373	14.4046	3.79454	0.166643	0.844549	3.06472	5.38601	2.15061	0.0847306	0.0511945	0.0135822	0.13436	100	95.1939
T3-3	T3	70.2243	0.695952	14.4164	3.42185	0.189184	0.865287	2.78637	4.94104	2.12611	0.116531	0.070013	0.024579	0.122363	100	93.4843
T3-3	T3	69.6238	0.692164	14.2063	4.08105	0.140848	0.816934	2.72906	5.25702	2.11828	0.13173	0.0238883	0.0264737	0.15243	100	96.1746
T3-3	T3	67.7845	0.801527	14.7954	4.69702	0.0946934	1.11732	3.29594	5.05711	1.92479	0.225293	0.032996	0.0531079	0.120252	100	94.943
T3-3	T3	69.0457	0.697672	14.6417	4.03306	0.0720811	0.868498	3.12188	5.08283	2.06942	0.190286	0.0126587	0.0215511	0.142593	100	95.0711
T3-3	T3	71.484	0.630673	14.0657	3.23666	0.121158	0.653814	2.41817	4.56743	2.48874	0.0905847	0.0988639	0.0152098	0.128971	100	96.0147
T3-3	T3	69.6892	0.692853	14.7201	3.83454	0.123952	0.79376	2.57896	5.15456	2.17121	0.105128	0.0112395	0.00848261	0.116	100	94.3211
T3-3	T3	69.3268	0.739706	14.6575	3.80907	0.214108	0.856119	2.96005	4.94336	2.07133	0.186882	0.0633736	0.0432616	0.128423	100	95.4801
T3-3	T3	68.5163	0.70331	14.6933	4.26178	0.146999	0.86565	3.01897	5.36239	2.07399	0.161605	0.017167	0.0379319	0.140626	100	97.2853
T3-3	T3	69.5645	0.691085	14.5698	3.85487	0.164702	0.81504	3.01837	4.93501	2.06784	0.145172	0	0.0406788	0.132912	100	95.6402
T3-3	T3	69.5043	0.708024	15.0996	3.95749	0.156134	0.785214	2.82525	4.64225	2.0359	0.159336	0	0.0119372	0.114618	100	94.6802
T3-3	T3	69.5097	0.704244	14.6552	3.99207	0.173058	0.904307	2.85798	4.79002	2.12662	0.151507	0.0278991	0	0.107401	100	95.3599
T3-3	T3	70.3205	0.727706	14.7062	3.32014	0.152501	0.761557	2.61112	4.97401	2.11137	0.158929	0.0510089	0	0.104963	100	95.0983
T3-3	T3	67.5772	0.829178	15.1836	4.62333	0.0258038	1.21027	3.38438	4.85588	1.95043	0.188536	0.0319674	0.0196401	0.119721	100	95.7294
T3-3	T3	66.3093	0.857405	15.4027	4.85726	0.19363	1.35872	3.95794	4.80436	1.82346	0.251188	0.0180593	0.0492624	0.116798	100	93.5838
T3-3	T3	69.8034	0.663681	14.6138	3.69383	0.0879612	0.759837	2.8067	5.08895	2.08306	0.138731	0.103341	0.0196991	0.137051	100	94.9411
T3-3	T3	67.9737	0.838571	14.9817	4.19077	0.220521	1.1691	3.40784	4.89866	1.92343	0.184308	0.0341813	0.049511	0.127714	100	96.5507
T3-3	T3	66.1635	0.926666	15.24	5.05957	0.162865	1.42913	3.95718	4.81878	1.7629	0.238586	0.043703	0.0740296	0.123144	100	97.9357
T3-3	T3	66.2095	0.849675	15.1919	5.04356	0.135423	1.50289	4.04065	4.88228	1.77574	0.20136	0	0.0494516	0.117629	100	96.6594
T3-3	T3	66.0323	0.8793	14.9306	5.13444	0.156137	1.50115	4.11025	4.91416	1.78143	0.231039	0.148443	0.0716054	0.109152	100	97.4786
MEAN	T3	68.9901	0.733905	14.6806	4.03694	0.14321	0.943839	3.05749	5.00142	2.04808	0.157919	0.0448372	0.0334171	0.12823	100	95.3021
STDEV		1.42999	0.0780717	0.322632	0.544118	0.0484541	0.240402	0.454508	0.19146	0.145464	0.0463647	0.0384563	0.0198398	0.0122831	1.07424e-14	1.19123
n		29	29	29	29	29	29	29	29	29	29	29	29	29	29	29
MEAN	T3	69.2537	0.725329	14.6327	3.92722	0.143862	0.879323	2.94469	5.04595	2.08395	0.153449	0.050554	0.0300954	0.129169	100	95.3922
STDEV		1.33416	0.0725925	0.468126	0.500813	0.0463662	0.220187	0.466806	0.233586	0.1568	0.0497452	0.039723	0.0175173	0.0137132	6.35529e-15	1.28212
n		81	81	81	81	81	81	81	81	81	81	81	81	81	81	81
T4-1	T4	70.9523	0.687088	14.4605	3.03253	0.106038	0.675688	2.1398	5.29966	2.34853	0.137224	0.0598891	0.000314654	0.100375	100	94.8422
T4-1	T4	70.1546	0.676119	14.3171	3.51276	0.158111	0.695176	2.29714	5.5152	2.33532	0.0848989	0.105025	0.0167914	0.131724	100	95.3694
T4-1	T4	70.4432	0.686695	14.1658	3.52405	0.207376	0.658859	2.17708	5.43661	2.34282	0.1165	0.0902954	0.0220769	0.128695	100	95.0644
T4-1	T4	70.4812	0.67504	14.3805	3.50404	0.126506	0.633599	2.20577	5.34764	2.35076	0.117002	0.0162725	0.0287657	0.13291	100	94.747
T4-1	T4	70.3972	0.678534	14.4203	3.65788	0.143803	0.655323	2.18298	5.24082	2.31835	0.125522	0.0397462	0.0131784	0.126408	100	94.3493
T4-1	T4	70.9447	0.71289	14.24	3.1402	0.16269	0.664811	2.27322	5.15428	2.36551	0.129316	0.0457434	0.0308477	0.135751	100	94.1595
T4-1	T4	70.366	0.67627	14.3405	3.41427	0.161774	0.630518	2.21347	5.50136	2.36868	0.127594	0.0742295	0.0146782	0.110715	100	94.8717
T4-1	T4	70.3192	0.707974	14.4126	3.67464	0.20701	0.657919	2.18024	5.24501	2.28371	0.133059	0.0280085	0.021059	0.129513	100	94.4678
T4-1	T4	70.5072	0.707321	14.1293	3.47181	0.203233	0.646548	2.2269	5.50827	2.28733	0.129672	0.0500734	0.00325425	0.12912	100	94.7487
T4-1	T4	70.7591	0.688619	14.2395	3.19628	0.200484	0.670061	2.17456	5.41395	2.31994	0.115763	0.0609119	0.0224744	0.138312	100	94.7142
T4-1	T4	70.6551	0.665425	14.2729	3.35315	0.210324	0.672152	2.25453	5.2505	2.37974	0.139695	0	0.0139224	0.132529	100	93.5942
T4-1	T4	70.4784	0.687254	14.5439	3.67336	0.150219	0.600782	2.10011	5.18288	2.31077	0.131686	0	0.0166793	0.123934	100	94.2296
T4-1	T4	70.4332	0.69086	14.2083	3.65455	0.104479	0.678093	2.19812	5.35947	2.34425	0.111943	0.0534542	0.0339106	0.12941	100	94.1543
T4-1	T4	70.2372	0.677309	14.363	3.62742	0.154453	0.682956	2.27758	5.22315	2.29526	0.135697	0.174691	0.0221247	0.129183	100	94.8629
T4-1	T4	70.6136	0.714055	14.1578	3.63093	0.145379	0.62271	2.15393	5.30224	2.35343	0.154097	0	0.014464	0.137355	100	94.2118
T4-1	T4	70.3063	0.659279	14.2886	3.62961	0.176573	0.630052	2.17885	5.49999	2.33509	0.12742	0.0167313	0.0247286	0.1268	100	94.5233
T4-1	T4	70.8922	0.693489	14.3399	3.15061	0.0711215	0.669383	2.22697	5.34484	2.34143	0.0844529	0.0288302	0.0199268	0.136837	100	93.8465
T4-1	T4	70.4545	0.657697	14.1404	3.44105	0.168968	0.679762	2.20337	5.57235	2.35788	0.148198	0.0300574	0.0114803	0.134215	100	95.3019
T4-1	T4	70.1946	0.682093	14.3609	3.51453	0.199962	0.661148	2.25513	5.42828	2.31551	0.105382	0.123726	0.0209544	0.137836	100	94.4627
T4-1	T4	70.424	0.676503	14.3454	3.62008	0.116209	0.58976	2.20092	5.35101	2.33584	0.144662	0.0315785	0.0389468	0.125156	100	94.4959
T4-1	T4	70.677	0.708578	14.5642	3.42689	0.145251	0.61222	2.14288	5.05308	2.32127	0.103715	0.104399	0.0158341	0.124667	100	94.2382
T4-1	T4	70.6662	0.721789	14.2231	3.27214	0.165394	0.650999	2.24334	5.52731	2.31484	0.0600014	0.0146994	0.00719105	0.133035	100	94.0568
T4-1	T4	70.8753	0.695029	14.3811	3.26512	0.201128	0.638676	2.07787	5.18084	2.30986	0.120602	0.0875847	0.0390438	0.127895	100	94.2687
MEAN	T4	70.5318	0.688083	14.3172	3.45165	0.160282	0.651182	2.19934	5.34516	2.332	0.121048	0.0537368	0.0196803	0.128799	100	94.5035
STDEV		0.236791	0.0175775	0.120045	0.194127	0.0380987	0.0274877	0.055014	0.140242	0.0256941	0.0221371	0.0443559	0.0100733	0.00864879	0	0.439844
n		23	23	23	23	23	23	23	23	23	23	23	23	23	23	23
T4-4	T4	70.8032	0.669554	14.3893	3.25017	0.176578	0.650683	2.19307	5.12767	2.45809	0.131368	0	0.0176684	0.132726	100	93.46
T4-4	T4	70.19	0.714479	14.299	3.54421	0.267701	0.73451	2.17886	5.39237	2.34566	0.112468	0.0879709	0	0.132693	100	94.5251
T4-4	T4	70.435	0.66636	14.3765	3.44233	0.137297	0.661386	2.23226	5.30241	2.4081	0.118841	0.0813729	0.0198981	0.118342	100	94.9808
T4-4	T4	70.3993	0.704032	14.1749	3.72662	0.138678	0.669193	2.37463	5.16493	2.33851	0.116797	0.0445676	0.0173612	0.130527	100	93.9586
T4-4	T4	70.4721	0.647353	14.3131	3.68391	0.143251	0.623907	2.09393	5.50137	2.28283	0.0751038	0.0147356	0.0129463	0.135463	100	94.5005
T4-4	T4	70.4304	0.700896	14.4222	3.5973	0.12075	0.647731	2.0977	5.32233	2.34907	0.120218	0.0604273	0.0156314	0.115295	100	94.816
T4-4	T4	69.9439	0.708773	14.5644	3.69753	0.171657	0.631127	2.25364	5.39912	2.3241	0.109068	0.0507955	0.00115206	0.144741	100	94.9738
T4-4	T4	70.4763	0.681717	14.2724	3.68689	0.18603	0.668998	2.18117	5.30111	2.27411	0.121354	0	0.0263349	0.123669	100	94.4249
T4-4	T4	70.8106	0.675266	14.2947	3.33761	0.0793828	0.624768	2.20823	5.4167	2.30175	0.119568	0	0	0.131385	100	93.7256
T4-4	T4	70.4141	0.663197	14.4421	3.30274	0.16183	0.655531	2.14946	5.45288	2.36971	0.145864	0.0586843	0.0496235	0.134226	100	94.4125
T4-4	T4	70.5002	0.696925	14.527	3.31848	0.142977	0.679878	2.10989	5.31009	2.4051	0.0843957	0.0992927	0.0118181	0.11396	100	94.2722
T4-4	T4	70.5936	0.653105	14.3103	3.32508	0.209301	0.662996	2.26775	5.29278	2.34923	0.121303	0.0287711	0.0542751	0.131419	100	94.3849
T4-4	T4	70.3687	0.68051	14.4249	3.48534	0.191168	0.657839	2.13931	5.27104	2.34915	0.172857	0.112973	0.00548002	0.140689	100	94.3892
T4-4	T4	70.4107	0.689095	14.4067	3.37043	0.223839	0.621735	2.13919	5.20346	2.4394	0.156909	0.196638	0.0194146	0.122509	100	95.8136
T4-4	T4	70.3157	0.687148	14.258	3.45953	0.209748	0.696618	2.2578	5.51641	2.34947	0.0751891	0	0.0353602	0.139027	100	94.7951
T4-4	T4	70.6693	0.679271	14.1913	3.21727	0.198391	0.641316	2.26712	5.4314	2.338	0.141267	0.0655333	0.0218093	0.13802	100	94.4083
T4-4	T4	70.6656	0.704115	14.4171	3.21765	0.139575	0.680842	2.19592	5.34961	2.2989	0.101375	0.0695251	0.0201644	0.13968	100	94.7147
T4-4	T4	70.9023	0.680591	14.4324	2.87453	0.180127	0.66385	2.15157	5.40414	2.36378	0.103794	0.0769082	0.0241803	0.14178	100	93.3857
T4-4	T4	70.6831	0.667562	14.524	3.2252	0.141271	0.66171	2.10491	5.36216	2.38885	0.0983003	0.00600034	0.00168431	0.135271	100	94.4952
MEAN	T4	70.4992	0.682629	14.3705	3.40857	0.16945	0.659717	2.18928	5.34326	2.35441	0.11716	0.055484	0.0186738	0.131654	100	94.444
STDEV		0.228653	0.0189285	0.109173	0.217475	0.0429299	0.0272516	0.073318	0.105505	0.0494322	0.0256219	0.0499687	0.015213	0.00899968	0	0.561277
n		19	19	19	19	19	19	19	19	19	19	19	19	19	19	19
MEAN	T4	70.5171	0.685616	14.3413	3.43216	0.16443	0.655043	2.19479	5.3443	2.34214	0.119289	0.0545272	0.019225	0.13009	100	94.4766
STDEV		0.230891	0.0181834	0.116994	0.203608	0.0401161	0.0273853	0.0633217	0.124263	0.0394263	0.0235585	0.0463968	0.0125024	0.0088184	0	0.492965
n		42	42	42	42	42	42	42	42	42	42	42	42	42	42	42
T5-1	T5	63.8527	1.03525	15.5432	5.51089	0.11269	1.83788	4.33288	5.35966	1.75721	0.428976	0.0317635	0.0835562	0.113296	100	98.292
T5-1	T5	56.2845	1.3253	15.7657	10.5022	0.28956	3.01518	6.9339	4.01038	1.16461	0.423242	0.0154032	0.188039	0.0820171	100	99.3549
T5-1	T5	60.4556	1.42598	14.4772	9.30132	0.231986	2.58731	5.74842	3.51145	1.79581	0.318928	0.0268269	0.0350498	0.0841811	100	96.6983
T5-1	T5	56.3769	1.42141	14.1996	11.1401	0.232112	3.59935	7.34186	3.84356	1.39597	0.323737	0.0341519	0.0317341	0.0595392	100	98.6094
T5-1	T5	56.6674	1.33398	15.9296	9.11945	0.216858	3.47434	7.10333	4.32194	1.10139	0.330526	0.129708	0.183237	0.0882666	100	97.841
T5-1	T5	60.1255	1.18047	15.6031	7.46188	0.242452	2.69336	5.88852	4.65434	1.32716	0.514708	0	0.203305	0.105234	100	98.5197
T5-1	T5	58.9526	1.25084	15.7757	7.66388	0.21275	2.9609	6.40167	4.73289	1.30295	0.489671	0.0289702	0.146561	0.0806741	100	98.8091
T5-1	T5	55.7884	1.278	15.6203	9.97807	0.271301	3.6689	7.61145	4.16707	1.05196	0.346924	0.0419383	0.100252	0.0754889	100	99.5103
T5-1	T5	59.0698	1.31166	14.4696	9.61888	0.193334	2.81495	6.00591	4.37283	1.65878	0.336677	0.0115139	0.0647783	0.0711861	100	99.2504
T5-1	T5	58.1758	1.28534	15.9886	8.32332	0.136306	3.00319	6.48485	4.59602	1.17962	0.462796	0.113939	0.157569	0.0925755	100	99.0954
T5-1	T5	54.88	1.3779	15.6818	10.4313	0.195133	3.82096	8.03825	3.84025	0.905983	0.224685	0	0.545151	0.05857	100	99.2441
T5-1	T5	57.7544	1.19717	15.5801	9.12115	0.295986	3.14364	6.69422	4.38795	1.26812	0.408571	0	0.0577339	0.0909108	100	99.1502
T5-1	T5	54.9154	1.28026	15.7938	10.2891	0.210682	3.72387	7.85584	3.66012	1.01787	0.268119	0.0951888	0.835792	0.0539772	100	98.8638
T5-1	T5	60.7843	1.13352	16.4554	6.71692	0.171153	2.45327	5.50412	4.58524	1.44164	0.552509	0.0264425	0.0974035	0.0780881	100	96.2577
T5-1	T5	56.8647	1.28359	15.7734	9.22826	0.36446	3.35648	7.01902	4.29742	1.02157	0.499697	0.0203036	0.190271	0.0808124	100	98.8708
T5-1	T5	57.5345	1.29662	15.8687	8.79667	0.28542	3.18835	6.66192	4.48586	1.14002	0.476724	0.0385378	0.13699	0.0896204	100	99.0288
T5-1	T5	62.8108	1.04924	15.3621	6.33352	0.111066	2.20762	5.02847	4.91283	1.63795	0.277077	0.108045	0.0825692	0.0787429	100	98.734
T5-1	T5	58.7768	1.263	16.1057	7.74516	0.179462	2.83098	6.21989	4.76864	1.26742	0.571155	0.0449927	0.123577	0.103219	100	97.6466
T5-1	T5	56.6127	0.944775	19.7056	6.79904	0.0749156	1.62909	8.36433	4.6701	0.910914	0.207053	0	0.0143757	0.0671204	100	98.2355
T5-1	T5	56.6583	1.26065	15.8054	9.23673	0.216188	3.51131	7.46025	4.19485	1.07149	0.33678	0	0.169862	0.0782129	100	99.1049
T5-1	T5	53.7603	1.07272	17.9814	8.47291	0.156697	3.69361	9.66798	4.09844	0.678281	0.186295	0.0361914	0.145561	0.0496141	100	99.9657
T5-1	T5	54.2108	1.29845	15.9086	10.8159	0.224784	4.04907	8.11854	3.86452	1.01482	0.185829	0.0249202	0.214534	0.0692338	100	98.8801
MEAN	T5	57.7869	1.24119	15.8816	8.75485	0.210241	3.05744	6.84026	4.33347	1.23234	0.371395	0.0376744	0.173087	0.0795718	100	98.6347
STDEV		2.64128	0.125852	1.13247	1.54201	0.0683413	0.6425	1.20841	0.444771	0.290518	0.118927	0.0388708	0.182943	0.0163414	0	0.877421
n		22	22	22	22	22	22	22	22	22	22	22	22	22	22	22
T5-3	T5	69.7805	0.540877	14.6068	4.15939	0.278451	0.973787	2.29295	4.6438	2.5033	0.095455	0	0	0.124696	100	94.6521
T5-3	T5	70.2559	0.541089	14.6372	3.63125	0.173527	0.544813	2.21169	5.3036	2.43238	0.125412	0	0.0159092	0.127274	100	94.9292
T5-3	T5	59.7866	1.11533	15.8058	7.66494	0.310736	2.72222	5.79991	4.60456	1.40671	0.510878	0.00846912	0.159703	0.10415	100	99.1752
T5-3	T5	70.3271	0.658666	14.5447	3.53741	0.123145	0.594292	2.27991	5.18256	2.45741	0.135617	0.0249023	0	0.134283	100	95.1878
T5-3	T5	54.1628	1.35151	15.6064	10.9622	0.180339	3.81197	8.47586	4.20556	0.711351	0.22784	0.0602472	0.176618	0.0672878	100	99.3679
T5-3	T5	56.8291	1.28301	15.8727	9.44934	0.23071	3.38537	7.34312	4.04086	1.11752	0.278115	0	0.114193	0.0559849	100	98.9191
T5-3	T5	59.0708	1.25	16.0623	7.61009	0.269301	2.78204	6.22798	4.66125	1.26932	0.413733	0.152253	0.151545	0.0794145	100	98.8248
T5-3	T5	57.0207	1.3233	16.0704	9.14081	0.211719	3.21458	7.12918	4.20332	1.11366	0.355596	0.0258981	0.136746	0.0541139	100	99.2025
T5-3	T5	58.3238	1.17254	15.6948	8.62086	0.166649	3.13159	6.77826	4.37387	1.22299	0.33143	0.00211458	0.10301	0.0780381	100	99.2822
T5-3	T5	57.7906	1.26628	16.3613	8.59777	0.151193	3.04409	6.78736	4.25948	1.20385	0.402881	0.0387338	0.0390372	0.0574434	100	98.8539
T5-3	T5	62.0366	1.19908	16.242	5.81693	0.134505	2.09048	5.19723	5.10219	1.53538	0.461523	0.00805601	0.111968	0.0641422	100	98.0501
T5-3	T5	56.0322	1.2933	15.9372	9.90357	0.215948	3.40494	7.61268	3.93472	1.05073	0.259276	0.0287261	0.260242	0.0663913	100	99.5212
T5-3	T5	56.184	1.32821	15.8351	9.57225	0.168895	3.75997	7.5791	3.94929	1.02216	0.351642	0.0159697	0.163538	0.0698424	100	98.9032
T5-3	T5	60.0834	1.19035	16.3033	7.03242	0.228733	2.50694	5.75842	4.73231	1.37897	0.466257	0.0907511	0.136478	0.0916536	100	99.708
T5-3	T5	57.0301	1.2297	15.9534	8.78849	0.11937	3.52306	7.20524	4.40628	1.07879	0.36283	0.00145067	0.210866	0.0903562	100	96.4736
T5-3	T5	64.9005	1.13215	14.0259	7.25909	0.179375	1.30193	3.8867	4.24562	2.43818	0.356664	0.0875078	0.063944	0.122386	100	96.3485
T5-3	T5	56.3769	1.30621	16.0331	9.29037	0.234352	3.52885	7.36632	4.23439	1.07929	0.323463	0	0.148393	0.0783184	100	99.4275
T5-3	T5	60.4354	1.25629	12.9104	9.62273	0.225526	3.9917	5.40857	4.15316	1.57443	0.338866	0.00643499	0.0231257	0.0533903	100	99.4536
T5-3	T5	58.8806	1.18133	16.1025	8.03936	0.256027	2.76976	6.31232	4.46692	1.23339	0.463868	0.0364601	0.172632	0.0849058	100	99.2693
T5-3	T5	55.0239	1.4172	15.4849	10.6992	0.177117	3.96064	7.97395	3.91705	0.975529	0.212575	0	0.0893164	0.0687049	100	98.9258
T5-3	T5	59.7757	1.20689	15.8463	7.57226	0.192084	2.69912	5.96006	4.80921	1.35464	0.433923	0	0.0522573	0.0975132	100	98.5313
T5-3	T5	66.0785	0.896229	15.1923	5.17307	0.114489	1.38574	3.66776	5.08478	1.9083	0.27094	0.0268891	0.0580847	0.142848	100	95.2085
T5-3	T5	59.021	1.25869	16.2812	7.4752	0.230361	2.90994	6.27263	4.50705	1.28234	0.475717	0	0.20258	0.0833438	100	98.609
MEAN	T5	60.2264	1.14775	15.5396	7.80952	0.198807	2.6973	5.89249	4.47921	1.45003	0.332804	0.0267332	0.112617	0.0868036	100	98.1228
STDEV		4.82653	0.247459	0.856527	2.12243	0.0530053	1.06009	1.85417	0.410151	0.528574	0.117507	0.0383614	0.0719086	0.0272439	0	1.6918
n		23	23	23	23	23	23	23	23	23	23	23	23	23	23	23
MEAN	T5	59.0338	1.19343	15.7068	8.27168	0.204397	2.87337	6.35584	4.40796	1.3436	0.351671	0.0320822	0.14218	0.0832681	100	98.373
STDEV		4.06179	0.201019	1.0044	1.90147	0.0605583	0.889982	1.62649	0.428899	0.438278	0.118469	0.0385684	0.139619	0.0226259	0	1.36583
n		45	45	45	45	45	45	45	45	45	45	45	45	45	45	45
T6-1	T6	70.8578	0.653676	13.9316	3.82907	0.131419	0.620747	2.47573	4.73164	2.41749	0.127628	0.0610838	0.0221836	0.139935	100	94.6103
T6-1	T6	70.046	0.680552	13.7301	4.15047	0.140419	0.663664	2.72942	4.98732	2.55304	0.123408	0.0365172	0.0142302	0.144813	100	95.0521
T6-1	T6	70.6049	0.667685	13.7661	4.00771	0.145554	0.672432	2.61596	4.75377	2.47122	0.119327	0.0422509	0.0101402	0.12295	100	94.1642
T6-1	T6	69.5117	0.680519	13.9636	4.53236	0.184107	0.661001	2.74187	4.89911	2.46206	0.0894271	0.115431	0.00955862	0.149301	100	95.7271
T6-1	T6	70.2572	0.605724	14.3325	3.88706	0.125712	0.628455	2.68909	4.85834	2.32108	0.105635	0.0278657	0.0169939	0.144289	100	94.2381
T6-1	T6	70.4089	0.629059	13.8146	4.23792	0.132614	0.670054	2.48481	4.88017	2.41631	0.124769	0.0501078	0.00864645	0.142094	100	95.4758
T6-1	T6	70.2617	0.669782	14.0634	3.9143	0.186227	0.636896	2.60023	4.877	2.45683	0.0853299	0.102995	0.00146389	0.143879	100	95.1263
T6-1	T6	70.0856	0.702589	13.8211	4.10825	0.161775	0.581871	2.63481	5.12979	2.45014	0.12215	0.0315658	0.0250242	0.145369	100	95.784
T6-1	T6	70.3956	0.635157	13.7179	4.09242	0.109284	0.65469	2.62684	4.9942	2.48292	0.0928434	0.0393966	0.0167645	0.141974	100	94.9227
T6-1	T6	70.1115	0.693096	13.9968	3.95664	0.180118	0.647213	2.73485	5.00796	2.46337	0.0486314	0.0228555	0	0.137028	100	94.8685
T6-1	T6	70.7945	0.657157	13.809	3.79697	0.0982335	0.603669	2.49002	4.84694	2.45277	0.107581	0.142266	0.0340725	0.166798	100	94.876
T6-1	T6	70.0758	0.690289	13.8253	4.10752	0.0939458	0.665666	2.6434	5.09039	2.44563	0.0940708	0	0.0264651	0.24156	100	94.3273
T6-1	T6	70.2373	0.682926	13.9195	4.17992	0.133854	0.637067	2.4625	4.94167	2.43608	0.0975449	0.0643129	0.0284441	0.178926	100	95.1123
T6-1	T6	70.4389	0.665543	13.9533	3.90689	0.130158	0.638978	2.55249	4.983	2.44058	0.109149	0.00831243	0.0275678	0.145099	100	94.5285
T6-1	T6	70.1697	0.656074	13.8061	3.97968	0.0865763	0.661685	2.77218	5.13419	2.42477	0.115276	0.0513553	0.012127	0.130234	100	94.3138
T6-1	T6	70.7547	0.649416	13.7759	3.98325	0.176161	0.584893	2.46147	4.89656	2.42452	0.0899344	0	0.0507066	0.15254	100	94.7432
T6-1	T6	70.1018	0.645833	13.8429	4.3861	0.173567	0.645782	2.60954	4.84081	2.46563	0.113648	0	0.0334752	0.140827	100	94.7799
T6-1	T6	69.7861	0.688932	13.9328	4.53726	0.131549	0.658551	2.64273	4.78938	2.47732	0.165064	0.0428346	0.00692913	0.140577	100	94.7351
T6-1	T6	70.0225	0.684019	13.8441	4.19127	0.163248	0.7562	2.7348	4.831	2.48265	0.145534	0	0.0126795	0.131972	100	94.1291
T6-1	T6	70.4683	0.686848	13.9924	4.04951	0.0985309	0.622123	2.59085	4.66303	2.45757	0.157583	0.0431729	0.0329837	0.137082	100	94.6914
T6-1	T6	70.5269	0.629287	13.8577	3.78978	0.138873	0.599598	2.63489	4.83558	2.56423	0.134744	0.0979286	0.031869	0.158606	100	94.2571
T6-1	T6	70.408	0.64262	13.688	4.12715	0.107025	0.642145	2.59399	5.03602	2.45094	0.118265	0.0356749	0.0164814	0.133729	100	95.3451
T6-1	T6	70.0921	0.667531	13.7434	3.94664	0.038798	0.661711	2.58995	5.34829	2.52015	0.0916036	0.0969428	0.0713214	0.131558	100	95.1015
MEAN	T6	70.279	0.663666	13.8751	4.07383	0.13338	0.644134	2.61358	4.92853	2.45814	0.112137	0.0483856	0.0221795	0.147876	100	94.8221
STDEV		0.319268	0.0246849	0.140778	0.207066	0.036566	0.0360092	0.094185	0.153363	0.0483783	0.0255723	0.0395054	0.0162191	0.0237509	1.94e-14	0.477127
n		23	23	23	23	23	23	23	23	23	23	23	23	23	23	23
T6-2	T6	70.2174	0.696852	14.1918	4.12497	0.139803	0.650387	2.5807	4.64791	2.4931	0.113146	0	0.00199119	0.142004	100	95.4398
T6-2	T6	70.0357	0.625033	14.2439	4.28089	0.10818	0.639522	2.62875	4.60479	2.49855	0.130338	0.0683739	0.00882244	0.12719	100	95.2335
T6-2	T6	70.3734	0.671008	14.1454	4.0625	0.12536	0.664733	2.58759	4.57501	2.46811	0.137301	0	0.0401404	0.149423	100	95.1889
T6-2	T6	70.0126	0.633062	14.1275	4.34121	0.127016	0.586285	2.68423	4.81408	2.41745	0.0870233	0.00638746	0.0271205	0.136021	100	95.5157
T6-2	T6	70.1093	0.662226	14.1236	3.85225	0.207084	0.651683	2.56641	5.05583	2.46883	0.0911103	0.0550278	0.0112557	0.145386	100	95.9646
T6-2	T6	70.0959	0.662455	14.1442	4.0501	0.210984	0.59943	2.62198	4.80558	2.50264	0.105339	0	0.0533222	0.148024	100	95.4743
T6-2	T6	70.2635	0.657928	14.0244	4.2289	0.157246	0.66018	2.40642	4.81851	2.49883	0.122175	0	0.0245795	0.137393	100	95.2217
T6-2	T6	70.2141	0.694143	13.9978	4.35704	0.121826	0.628316	2.63464	4.61785	2.40991	0.145349	0.0110084	0.0301944	0.137867	100	95.4045
T6-2	T6	70.4912	0.72344	14.0471	3.82487	0.103008	0.651613	2.51955	4.70541	2.6428	0.111479	0	0.0337765	0.145805	100	95.3514
T6-2	T6	70.2021	0.614253	14.2499	3.90193	0.175553	0.652024	2.62791	4.86973	2.45561	0.0796753	0	0.0288738	0.142479	100	95.2571
T6-2	T6	70.0903	0.683449	14.0359	4.11068	0.180862	0.580691	2.60607	4.87916	2.46553	0.105157	0.0815613	0.0328555	0.147797	100	95.2818
T6-2	T6	69.7743	0.638428	14.1658	3.95902	0.201085	0.625901	2.81449	4.96895	2.45199	0.0984393	0.129688	0.0252667	0.146568	100	95.3948
T6-2	T6	70.7249	0.654662	13.9437	3.95555	0.131422	0.592243	2.63569	4.56351	2.52629	0.111915	0	0.0210613	0.139004	100	94.9833
T6-2	T6	70.3939	0.641061	14.1032	4.02499	0.149724	0.600262	2.53078	4.84503	2.3907	0.0954649	0.0461659	0.0413395	0.137344	100	95.3263
T6-2	T6	70.4957	0.645188	14.0233	4.0186	0.115141	0.596916	2.43584	4.8778	2.38071	0.135934	0.124545	0.0202699	0.129978	100	95.7299
T6-2	T6	70.5147	0.71214	14.1254	3.90242	0.11383	0.627113	2.55406	4.75311	2.45592	0.106575	0	0.0035703	0.131156	100	95.2484
T6-2	T6	70.0251	0.701025	13.9637	4.08888	0.0916448	0.630781	2.68657	5.08292	2.51361	0.0687901	0	0.0134679	0.133521	100	95.0506
MEAN	T6	70.2373	0.665668	14.0974	4.06381	0.144692	0.625769	2.59539	4.79325	2.47298	0.108542	0.0307505	0.0245828	0.139821	100	95.3569
STDEV		0.237224	0.0318231	0.0914391	0.16287	0.0379396	0.0278966	0.0949627	0.159129	0.0609365	0.0210852	0.0453486	0.0138992	0.00684371	0	0.234716
n		17	17	17	17	17	17	17	17	17	17	17	17	17	17	17
MEAN	T6	70.2613	0.664517	13.9696	4.06957	0.138188	0.636329	2.60585	4.87103	2.46445	0.110609	0.0408907	0.0232009	0.144453	100	95.0494
STDEV		0.284646	0.0275718	0.164308	0.187335	0.0371059	0.0336935	0.0937372	0.168058	0.0538404	0.0235483	0.0424502	0.0151359	0.0188066	1.45707e-14	0.471892
n		40	40	40	40	40	40	40	40	40	40	40	40	40	40	40
T7-1	T7	77.623	0.102404	13.0271	0.681979	0.0483455	0.0951042	0.619394	3.69565	3.87141	0.0154452	0.0528944	0.0144931	0.152865	100	94.8744
T7-1	T7	77.6705	0.147489	13.0792	0.735615	0.0727909	0.114113	0.594512	3.53409	3.88819	0	0	0.0262768	0.137211	100	94.715
T7-1	T7	77.5643	0.103756	12.8294	0.805478	0.0181547	0.11885	0.614517	3.4912	4.26818	0	0.0302931	0	0.155899	100	95.0704
T7-1	T7	77.5865	0.132998	12.9967	0.710754	0.0139048	0.0616695	0.581668	3.74749	4.01316	0.00806693	0	0.00530719	0.141808	100	94.5596
T7-1	T7	77.9409	0.0998936	12.9727	0.540395	0.0605256	0.0812622	0.619572	3.61856	3.88405	0.0113683	0.0198945	0.00115788	0.149788	100	95.3419
T7-1	T7	77.5364	0.138815	13.1832	0.606256	0.0558881	0.0967663	0.629886	3.61007	3.99259	0.012668	0	0.00191616	0.135515	100	94.2739
T7-1	T7	77.9755	0.116605	12.8511	0.558694	0.167298	0.074098	0.654603	3.41297	3.94698	0.00167928	0.0473346	0.0405125	0.152604	100	95.6053
T7-1	T7	77.8845	0.111694	12.835	0.642116	0.121742	0.100059	0.64626	3.55744	3.86006	0.0148079	0.0656838	0.0098367	0.150724	100	94.8797
T7-1	T7	77.4148	0.131965	12.9775	0.674056	0.14146	0.0990006	0.61662	3.58807	4.1737	0.0218697	0	0.00853453	0.152448	100	94.0692
T7-1	T7	77.5621	0.121991	13.0483	0.56192	0.118505	0.0922059	0.591047	3.44441	4.28163	0.00802709	0.00813271	0.00866081	0.153043	100	95.0025
T7-1	T7	77.2475	0.162646	13.0164	0.672408	0.0572982	0.0982256	0.61593	3.72355	4.22343	0.0131818	0	0.0416715	0.127778	100	94.4118
MEAN	T7	77.6369	0.124569	12.9833	0.653606	0.0796285	0.0937595	0.616728	3.58396	4.03667	0.00973765	0.0203848	0.014397	0.146335	100	94.8003
STDEV		0.222301	0.0201819	0.109493	0.0819991	0.050344	0.0164824	0.022097	0.110047	0.167822	0.00699198	0.0248221	0.0150866	0.00923094	0	0.457683
n		11	11	11	11	11	11	11	11	11	11	11	11	11	11	11
T7-2	T7	77.6044	0.13231	13.1389	0.708079	0.0713265	0.0663703	0.581063	3.49366	3.98652	0.030276	0.0374949	0	0.149549	100	93.138
T7-2	T7	77.9972	0.109634	12.7925	0.640915	0.0677211	0.100888	0.579842	3.54729	3.96752	0	0.024209	0.0305012	0.141734	100	94.0981
T7-2	T7	77.6147	0.124399	12.7528	0.802816	0.0848415	0.0997948	0.602481	3.51762	4.22411	0	0.00742363	0.0278916	0.141155	100	94.6235
T7-2	T7	77.89	0.10819	12.9112	0.520108	0.124908	0.0885965	0.611976	3.63097	3.90769	0.0477058	0.00212972	0	0.156535	100	94.2458
T7-2	T7	78.0134	0.125739	12.9209	0.695119	0.0772381	0.082366	0.657005	3.335	3.92031	0.00405954	0	0.0124991	0.156292	100	93.9237
T7-2	T7	77.7152	0.12415	12.9548	0.656136	0.0561402	0.0948502	0.655824	3.72571	3.85925	0.00812696	0	0.000534668	0.149279	100	93.8605
T7-2	T7	77.5417	0.143209	12.9832	0.585027	0.0602701	0.091963	0.651798	3.58341	4.14881	0	0.0625262	0	0.148043	100	93.4099
T7-2	T7	77.7857	0.139134	12.9294	0.684809	0.0798209	0.087498	0.624475	3.45892	4.03998	0.0198764	0	0.0155646	0.134823	100	95.4174
T7-2	T7	77.6419	0.123562	12.9711	0.642914	0.00310242	0.114682	0.619948	3.73726	3.93663	0	0.0454665	0.0170098	0.146455	100	93.8198
T7-2	T7	77.4571	0.130353	12.9765	0.674421	0.065916	0.121585	0.622399	3.73933	3.97255	0.0467962	0.0246129	0.0215495	0.146938	100	95.0145
T7-2	T7	77.8064	0.1158	12.8342	0.694323	0.112034	0.0935229	0.635073	3.61968	3.89495	0.0256139	0	0.0339007	0.134527	100	93.2532
T7-2	T7	77.7137	0.133078	12.9279	0.676547	0.044181	0.0877201	0.592966	3.39918	4.20683	0.0502786	0	0.0224649	0.145166	100	93.797
T7-2	T7	77.344	0.114677	13.083	0.689626	0.0561725	0.0741901	0.616308	3.4662	4.28576	0.0303119	0.0744021	0.0101746	0.155163	100	94.6773
T7-2	T7	77.6433	0.125122	12.9109	0.725246	0.0924581	0.0955436	0.612841	3.61801	4.00119	0.0189385	0	0.0143635	0.142145	100	94.3263
T7-2	T7	77.773	0.111233	12.9574	0.713654	0.0652981	0.0900404	0.628992	3.34826	4.15428	0	0	0.0155984	0.142214	100	93.2719
T7-2	T7	77.4863	0.14897	12.9669	0.7498	0.114592	0.101556	0.582422	3.73125	3.88982	0	0.0745374	0.00841042	0.145395	100	95.4717
T7-2	T7	77.7963	0.141418	12.9681	0.637939	0.0318509	0.0908812	0.615253	3.64977	3.89608	0.0217648	0	0	0.150655	100	94.53
T7-2	T7	77.7234	0.117174	12.9508	0.708387	0.0289463	0.0755167	0.612251	3.64211	3.97367	0.00523383	0	0.0174105	0.145052	100	93.9601
T7-2	T7	77.6187	0.14007	13.0047	0.610332	0.0998817	0.0808056	0.600469	3.55469	4.09527	0.026578	0.0415817	0	0.126888	100	93.6391
T7-2	T7	77.4653	0.119873	12.96	0.704629	0.09472	0.090826	0.635571	3.68641	4.01108	0.0227328	0.0562005	0.00589369	0.146711	100	95.3629
T7-2	T7	77.6958	0.135886	12.9056	0.675358	0.0664616	0.104561	0.625247	3.64794	3.93712	0	0.0283626	0.0331249	0.144564	100	94.8326
T7-2	T7	77.5765	0.130025	13.0913	0.714113	0.111208	0.0576125	0.597056	3.60454	3.96474	0.0228336	0	0	0.13013	100	94.9371
T7-2	T7	77.4581	0.112516	12.9172	0.673001	0.101658	0.081007	0.642947	3.54066	4.2937	0.0138383	0.0171382	0.010219	0.138063	100	94.2707
T7-2	T7	77.858	0.113523	13.0141	0.628592	0.0421167	0.11876	0.605133	3.43635	3.9227	0.0340995	0.0808127	0	0.145805	100	93.873
T7-2	T7	77.4602	0.145917	13.0447	0.791305	0.0807698	0.0714175	0.593764	3.67317	3.91072	0.057389	0.00255062	0	0.168129	100	94.4388
T7-2	T7	77.842	0.152542	12.9492	0.712593	0.0745148	0.122204	0.568122	3.44181	3.93864	0.0292737	0	0.0120288	0.157013	100	94.2668
T7-2	T7	77.951	0.0978822	12.7913	0.417833	0.0258477	0.112713	0.618543	3.72037	4.04803	0.0326274	0.0476699	0.0019068	0.134217	100	94.7414
T7-2	T7	77.8868	0.106476	12.8141	0.543387	0.142922	0.084969	0.608132	3.72084	3.87717	0.0183287	0.047464	0	0.14949	100	94.7328
T7-2	T7	77.4717	0.112625	13.075	0.751997	0.114114	0.0617894	0.632677	3.46823	4.06397	0	0.0726371	0.0168033	0.158462	100	94.3563
T7-2	T7	77.6512	0.154458	13.0734	0.640189	0.0857037	0.0798408	0.612824	3.73377	3.81476	0	0	0.0199336	0.133885	100	94.1583
T7-2	T7	77.7487	0.0979032	12.8165	0.698377	0.0333713	0.111378	0.603315	3.39396	4.28884	0.0125274	0.0336871	0.0103167	0.151171	100	95.3136
T7-2	T7	77.4968	0.107396	12.9941	0.644042	0.0803349	0.0806532	0.615193	3.59885	4.19474	0.0291837	0	0.0199511	0.138702	100	94.5649
T7-2	T7	77.6764	0.132239	13.0272	0.595866	0.0755955	0.0892535	0.610587	3.56098	4.05656	0.0131286	0	0.0276336	0.134568	100	94.7836
T7-2	T7	77.6664	0.114406	13.0115	0.68874	0.0918636	0.119063	0.609919	3.53989	3.93724	0.0228601	0	0.058526	0.139595	100	94.8223
T7-2	T7	77.9639	0.123016	12.9049	0.499633	0.0453825	0.11167	0.619702	3.55278	3.97188	0.0312005	0.0254226	0.0253175	0.125222	100	95.526
T7-2	T7	77.6673	0.119397	13.0298	0.619047	0.0780017	0.101838	0.634442	3.6384	3.8943	0.022347	0.0598048	0	0.135359	100	94.3117
T7-2	T7	77.6601	0.111604	13.0093	0.607372	0.0616114	0.090605	0.613236	3.64455	3.97631	0.0184408	0.0306991	0.0246232	0.151577	100	94.152
T7-2	T7	77.5141	0.137493	12.9762	0.64663	0.143035	0.0516931	0.622662	3.64419	4.04057	0.00863328	0.0508404	0.0219562	0.142076	100	94.1608
T7-2	T7	77.4931	0.103924	12.9423	0.749943	0.0790035	0.10297	0.668613	3.57651	4.04159	0.0205727	0.0568401	0.00381762	0.16087	100	94.6355
T7-2	T7	77.5047	0.107632	12.7772	0.767206	0.1292	0.109112	0.609313	3.67389	4.15779	0.00740099	0.00940983	0.0037005	0.143474	100	94.9244
T7-2	T7	78.019	0.151255	12.9287	0.578098	0.0505974	0.0776687	0.615119	3.55321	3.77927	0	0.0825028	0.0284678	0.136108	100	93.4184
MEAN	T7	77.6803	0.121649	12.9544	0.643381	0.0796658	0.094311	0.614517	3.58732	3.99528	0.0198896	0.0333523	0.0152768	0.144762	100	94.51
STDEV		0.176492	0.0191588	0.096931	0.0971421	0.0348833	0.0209593	0.0198065	0.103484	0.130861	0.0146769	0.0300263	0.0151242	0.0113889	1.37866e-14	0.499554
n		41	18	18	18	18	18	18	18	18	18	18	18	18	18	18
MEAN	T7	77.6711	0.124355	12.9578	0.66065	0.0773201	0.0923333	0.616337	3.58217	4.01704	0.0165402	0.0253973	0.0140473	0.144863	100	94.4589
STDEV		0.185584	0.0162914	0.094281	0.0781948	0.0361407	0.0171124	0.0212389	0.110062	0.137987	0.0145838	0.0273869	0.0133304	0.00926932	7.95967e-15	0.618879
n		52	52	52	52	52	52	52	52	52	52	52	52	52	52	52

## Sheet: Table S4
Table S4. Operating conditions for glass trace element and Pb isotope analyses performed by LA-ICP-MS in this study.
Operating Conditions	Trace element analysis, Aberystwyth	Pb isotope analysis, Aberystwyth
ICP-MS	Thermo Finnegan Element 2	Thermo Finnegan Element 2
Cool gas	15.4 L min-1	15 L min-1
Auxiliary gas	~0.95-1.05 L min-1	0.75 L min-1
Sample gas	~0.8 L min-1 Ar (~65% of flow)	0.825 L min-1 He
“Make up” nebuliser gas	~0.45-0.475 L min-1 Ar	~0.700 L min-1 Ar
RF power	1150 -1050 W	~1025 W
Guard Electrode	Off	On
UO+/U+	Tuned to <0.5% (typically <0.3%)	<1%
ThO+/Th+	Tuned to <1.25% (typically <0.8%)	Not measured
Internal standard	29Si	None required
Internal standard/gas blank cps at given crater diameter crater on NIST 612	>30 from 20 µm crater, 24s acquisition	Not measured
208Pb cps, for 30 µm crater, 19 s acquisition from:-
NIST 612
Sample (average)
	Not appropriate	~270000 cps
		~28000 cps
Analytes	29Si, 43Ca, 44Ca, 85Rb, 88Sr, 89Y, 90Zr, 93Nb, 133Cs, 137Ba, 139La, 140Ce, 141Pr, 143Nd, 147Sm, 151Eu, 158Gd, 159Tb, 163Dy, 165Ho, 166Er, 169Tm, 174Yb, 175Lu, 178Hf, 181Ta, 232Th, 238U	201Hg, 204Pb, 206Pb, 207Pb, 208Pb
		N.B. 204Pb includes contribution from 204Hg
Detector mode	Analog for Si and Ca, pulse counting for all other elements	Pulse counting
Runs/Passes	2013-10-01	1/100
Samples per peak	100	50
Mass window	0.05	0.1
Segment duration	0.05 s	0.05 s for masses 201 and 204
		0.025 s for masses 206, 207 and 208
Acquisition time or integration time	24 s	19 s
Laser ablation settings
Laser System	Coherent GeoLas, 193 nm ArF laser	Coherent GeoLas, 193 nm ArF laser
Fluence	10 J cm-2	10 J cm-2
Repetition rate	5 Hz	7 Hz
Pulse length	~ 20 ns nominal, ~13 ns (typical)	~ 20 ns nominal, ~13 ns (typical)
Crater diameters	Samples 20 µm, 14 µm, 10 µm	Samples 30 µm, 20 µm
	NIST Calibration 20 µm
		NIST Calibration 30 µm
Mask thickness (for 14 µm and 20 µm craters)	0.3 mm	0.3 mm

## Sheet: Table S5
van den Bogaard et al. (2013)
Table S5: Comparison of LA-ICP-MS trace element analyses of the MPI-DING reference glass ATHO-G performed at Aberystwyth, compared to accepted GeoReM concentrations.
	ATHO-G			ATHO-G		Aber/ GeoReM
	GeoReM			Aberystwyth
				(this study, 20 µm ablation)
Element	Accepted	95% CL		Average	sd (n=10)
Rb	65.3	3		63.5005	2.24942	0.972442
Sr	94.1	2.7		93.8587	4.17619	0.997435
Y	94.5	3.5		95.3994	6.68768	1.00952
Zr	512	20		506.053	26.7513	0.988384
Nb	62.4	2.6		62.6221	2.2016	1.00356
Cs	1.08	0.11		1.00841	0.114995	0.933716
Ba	547	16		537.419	13.9859	0.982484
La	55.6	1.5		54.2305	2.27619	0.975369
Ce	121	4		121.756	3.07644	1.00625
Pr	14.6	0.4		14.5255	0.388683	0.994899
Nd	60.9	2		62.7983	3.1846	1.03117
Sm	14.2	0.4		13.8648	0.940587	0.976398
Eu	2.76	0.1		2.69349	0.279125	0.975903
Gd	15.3	0.7		15.7339	1.4177	1.02836
Tb	2.51	0.08		2.46386	0.126793	0.981617
Dy	16.2	0.7		16.5295	1.09564	1.02034
Ho	3.43	0.11		3.47203	0.317469	1.01225
Er	10.3	0.5		10.312	0.771091	1.00117
Tm	1.52	0.07		1.54291	0.138178	1.01507
Yb	10.5	0.4		10.1515	0.653964	0.966807
Lu	1.54	0.05		1.58211	0.150126	1.02734
Hf	13.7	0.5		13.4584	0.912655	0.982361
Ta	3.9	0.2		3.86813	0.200168	0.991827
Pb	5.67	0.62		5.53768	0.545688	0.976663
Th	7.4	0.27		7.51012	0.400378	1.01488
U	2.37	0.12		2.40574	0.142581	1.01508
Average						0.997903

## Sheet: Table S6
Table S6. All trace element concentrations in single glass shards from El'gygtgyn core tephras obtained by LA-ICP-MS at Aberytwyth. All concentrations in ppm unless otherwise stated.
Sample Number	Eruption ID	Crater diameter um	Int'l std - SiO2, wt%	Rb	Sr	Y	Zr	Nb	Cs	Ba	La	Ce	Pr	Nd	Sm	Eu	Gd	Tb	Dy	Ho	Er	Tm	Yb	Lu	Hf	Ta	Pb	Th	U
UA1936-1	T0	20	72.7918	39.3	217	84.5	300	4.37	1.85	717	18.4	36.6	6.2	30	9.97	2.33	11.5	1.84	16	3.04	9.49	1.32	9.95	1.64	8.9	0.419	15.9	4.55	1.62
UA1936-2	T0	20	72.7918	41.1	226	72	248	4.1	1.92	579	17.8	31	4.75	29.6	9.54	2.35	10.9	1.6	12.5	3.07	8.29	0.96	9.06	1.04	7.62	0.448	12.9	3.4	1.41
UA1936-3	T0	20	72.7918	38.6	200	61.4	221	3.86	1.45	540	13	28.8	4.69	21.8	7.76	2.46	10.2	1.64	11	2.9	6.7	1.51	7.74	1.13	6.32	0.494	13	3.08	1.41
UA1936-4	T0	20	72.7918	40.9	218	69.1	239	4.11	1.63	590	14.6	32.2	5.31	27	7.21	2.02	10.6	1.87	11.2	2.75	9.01	1.2	8.24	1.41	7.65	0.446	14.9	3.45	1.49
UA1936-5	T0	20	72.7918	44.6	218	73.8	256	4.54	1.71	634	18	36.1	5.79	27.1	7.84	1.51	11	2.13	11.6	2.3	7.83	1.09	9.26	1.41	9.77	0.425	15.8	3.84	1.81
UA1936-7	T0	20	72.7918	37.5	242	84.5	281	5.3	1.74	600	19.2	36.3	5.5	34.5	7.7	2.53	11.4	2.65	14	3.39	9.82	1.19	8.54	1.19	8.48	0.654	13.6	4.64	1.7
UA1936-8	T0	20	72.7918	36.2	234	70.4	262	4.76	1.41	608	15.9	33.4	5.35	23.4	9.22	2.13	12.2	1.43	13	2.56	9.02	1.16	7.96	1.1	8.46	0.44	15.7	3.98	1.76
UA1936-10	T0	20	72.7918	35.2	223	78.1	273	5.16	1.66	582	16.1	32.2	5.62	27.8	14.4	1.43	11.2	2.2	11.2	2.96	7.3	1.55	8.74	1.37	8.28	0.409	12.8	3.65	1.36
UA1936-11	T0	20	72.7918	39.6	200	75.7	247	4.03	1.6	640	16.1	32.8	4.99	26.4	9.58	1.94	10.4	1.92	12.1	2.47	7.26	1.25	8	1.37	9.15	0.192	13.3	3.47	1.64
UA1936-13	T0	20	72.7918	35.2	232	70.6	253	3.84	1.86	572	15.6	34.4	5.13	28.8	8.94	1.74	11.4	1.68	11.7	2.89	8.28	1.1	7.07	1.11	9.27	0.433	14.1	4.14	2.7
UA1936-14	T0	20	72.7918	35	215	63.6	222	3.87	1.38	588	13.2	30.6	4.72	28.3	6.31	1.69	8.7	1.85	11.1	2.43	6.59	0.918	6.62	1.28	7.9	0.393	13.5	3.05	1.2
UA1936-15	T0	20	72.7918	35.5	186	62.2	219	3.88	1.56	540	16.1	31.8	4.72	24.5	7.05	1.33	9.27	1.56	9.78	2.37	7.91	1.3	6.49	1.4	7.48	0.466	13.6	3.03	1.27
UA1936-16	T0	20	72.7918	34.6	210	66.4	227	4.2	1.51	590	13.6	31.8	5.42	25.6	7.63	1.61	9.17	1.66	11.6	2.06	6.92	1.16	7.89	1.43	8.2	0.322	15.3	3.69	1.36
UA1936-17	T0	20	72.7918	38.5	221	89	250	4.76	1.83	616	19.2	36.5	5.39	26.3	8.21	1.82	10.5	1.65	13.1	3.03	8.66	1.15	7.09	1.18	9.62	0.364	13.5	3.9	1.86
UA1936-18	T0	20	72.7918	38.9	191	61.2	216	3.97	1.62	572	14.8	29.5	4.34	23.3	7.61	1.86	8.78	1.54	10.5	2.14	6.33	1.03	7.04	1.12	6.03	0.332	14.6	2.82	1.22
UA1936-19	T0	20	72.7918	37.1	209	64.6	237	3.91	1.61	554	14.2	32.7	5.11	27.9	7.86	1.42	9.8	1.78	11	2.17	8.41	0.936	7.81	1.16	6.59	0.555	13.5	3.4	1.52
UA1936-20	T0	20	72.7918	39.2	224	70.7	264	4.22	1.55	596	17.1	33.8	5.07	25.4	6.9	1.79	9.92	1.86	10.7	2.56	8.47	1.14	7.98	1.21	8.82	0.333	14.5	4.16	1.65
UA1936-21	T0	20	72.7918	31.5	214	64.7	223	3.95	1.28	542	18.8	30.4	4.43	24	6.74	1.58	10	1.39	10.1	1.85	6.65	1.05	7.21	1.38	5.79	0.428	12	2.92	1.28
UA1936-22	T0	20	72.7918	29.3	148	57.9	227	3.93	1.57	485	13.9	29.2	4.29	23.3	6.51	1.58	8.15	1.4	9.49	2.19	6.77	1.09	6.39	1.27	6.43	0.485	41.4	2.95	1.69
UA1936-23	T0	20	72.7918	36.8	188	59	207	4.09	1.57	547	12.6	29.8	4.56	24.3	6.35	1.58	8.17	1.5	9.48	2.28	7.54	0.931	5.99	1.31	7.05	0.29	12.9	2.9	1.33
UA1936-24	T0	20	72.7918	36.7	184	70	253	4.87	1.57	655	14.2	33	5.16	24.4	8.82	2.32	10	2.16	11.7	2.72	8.36	1.57	7.79	1.5	8.3	0.664	19.5	3.65	1.74
UA1936 avg.	T0	All 20 um	72.7918	37.2	210	70	244	4.27	1.61	588	15.8	32.5	5.07	26.4	8.2	1.86	10.2	1.78	11.6	2.58	7.89	1.17	7.75	1.29	7.91	0.428	15.5	3.56	1.57
s.d.				3.34	21.5	8.63	23.8	0.448	0.165	49.2	2.13	2.44	0.5	2.94	1.8	0.368	1.14	0.312	1.55	0.404	1.02	0.193	1.01	0.155	1.19	0.11	6.15	0.54	0.329
UA1939-1	T1	20	77.7832	46.4	152	41	268	4.02	1.36	879	18.4	31.5	4.32	18.8	4.5	0.908	5.99	0.951	6.68	1.25	4.85	0.676	5.87	0.596	7.37	0.68	15.6	5.43	2.08
UA1939-2	T1	20	77.7832	46.3	144	38	261	4.15	1.81	856	18.2	33.1	4.71	23.1	5.47	0.801	6.94	0.823	5.85	1.48	4.09	0.596	4.15	1.07	8.8	0.576	14.7	5.12	1.99
UA1939-3	T1	20	77.7832	52.4	155	41.6	269	4.03	2.88	943	18.8	34	4.79	20	6.31	0.8	5.71	0.884	5.99	1.47	4.86	0.448	5.48	0.815	7.79	0.38	31.4	5.76	2.62
UA1939-4	T1	20	77.7832	74.9	139	28.5	194	3.98	1.55	711	14.2	24.3	3.69	16.6	5.34	0.944	4.74	0.747	4.89	1.02	4.02	0.895	4.52	0.794	6.75	0.499	28.6	3.82	3.38
UA1939-5	T1	20	77.7832	64.9	180	46.7	272	5.12	2.08	790	12.8	31.1	3.96	20.7	5.18	1.16	7.66	0.999	5.92	1.1	4	0.659	4.5	0.981	8.29	0.489	29.5	5.27	4.15
UA1939-6	T1	20	77.7832	47.8	197	37.6	269	4.43	1.94	950	21	34.1	5.39	18.1	4.56	0.628	5.51	0.762	5.02	1.39	4.58	0.524	5.07	0.828	7.35	0.778	16.3	5.46	2.73
UA1939-7	T1	20	77.7832	50.9	155	37.3	265	5.59	1.49	898	17.8	35.9	4.51	19	4.43	0.672	4.99	0.971	6.51	1.6	4.51	0.72	4.63	0.965	7.66	0.405	15.7	5.21	2.74
UA1939-8	T1	20	77.7832	51.9	157	40.1	276	6.01	1.45	926	19.4	35.4	5.31	20	4.19	0.735	6.29	0.919	4.98	1.32	5.59	0.698	5.11	0.936	7.93	0.669	21.7	5.48	2.15
UA1939-10	T1	20	77.7832	50	156	41.6	266	4.46	1.72	922	20.3	33.7	5.2	22	4.4	0.882	6.34	0.996	7.72	1.5	4.54	0.944	5.03	0.753	8.41	0.47	16.2	4.89	2.22
UA1939-11	T1	20	77.7832	47.7	167	38.3	251	4.64	1.61	952	18.9	35	4.53	17.8	5.25	0.889	5.59	0.968	6.72	1.62	4.26	0.809	4.49	0.854	7.09	0.495	15.4	4.9	2.27
UA1939-12	T1	20	77.7832	46.5	144	35.2	244	4.55	1.86	860	17.1	38.6	4.55	18.6	5.47	0.722	5.09	0.92	5.17	1.22	4.48	0.575	4.35	0.79	7.53	0.542	14.7	4.6	2.4
UA1939-13	T1	20	77.7832	52.2	136	33.9	231	4.63	1.54	854	17	33.5	4.71	16.6	5.46	0.798	5.53	0.88	4.87	1.1	3.66	1.05	5.28	0.892	6.89	0.583	16.8	5.02	2.38
UA1939-14	T1	20	77.7832	47.7	128	32.1	214	4.13	1.59	830	15	30.4	3.79	17.9	3.6	0.87	5.36	0.917	5.66	1.17	3.97	0.641	4.71	0.74	6.78	0.525	13.9	4.2	2.24
UA1939-15	T1	20	77.7832	43.3	136	36.6	233	4.3	1.66	814	26.3	32.7	4.33	18.2	4.45	0.703	4.33	0.87	4.9	1.38	3.71	0.625	4.24	0.897	6.85	0.322	13.6	5.29	2.07
UA1939-16	T1	20	77.7832	45.2	144	38.6	246	3.52	1.63	859	17.9	34	4.33	19.5	4.86	0.742	4.99	0.825	6.42	1.43	4.41	0.581	3.92	0.851	8.03	0.479	15.3	4.85	2.23
UA1939-17	T1	20	77.7832	52.7	147	37.3	256	4.59	1.84	903	18.4	34.3	4.42	16.8	5.5	0.814	5.09	0.912	4.68	1.35	4.33	0.691	4.53	0.732	7.93	0.652	15.7	5.58	2.66
UA1939-18	T1	20	77.7832	56.7	144	36.5	259	4.53	1.84	887	19	33.6	4.8	21	3.78	1.02	5.85	0.846	6.16	1.32	4.31	0.965	6.06	0.639	7.13	0.578	16.8	5.46	2.63
UA1939-19	T1	20	77.7832	76	174	44.8	335	5	4.14	1200	25.9	51.6	5.45	25.9	6.78	0.837	5.25	0.989	9.15	1.95	9.26	0.564	4.79	0.706	12	0.376	20.6	6.25	2.95
UA1939-20	T1	20	77.7832	50.3	149	38.6	262	3.99	1.77	892	28.1	39.1	5.86	26.3	5.37	1.16	6.44	0.807	6.32	1.55	4.45	0.833	6.39	0.925	8.12	0.639	18.5	6.94	2.58
UA1939-21	T1	20	77.7832	39.9	134	27.9	201	3.33	1.31	657	16.7	26.6	3.42	16.4	4.11	0.924	4.8	0.573	6.09	1.33	4.15	0.66	3.82	0.641	6.04	0.349	20.5	4.44	1.77
UA1939-22	T1	20	77.7832	46.9	156	35.9	252	3.98	1.44	879	18.7	33	4.54	21.1	5.36	1.06	6.23	0.722	7.14	1.37	4.44	0.97	6.82	1.22	7.37	0.478	18.8	5.67	2.69
UA1939-23	T1	20	77.7832	44.6	139	36.6	231	3.96	1.3	857	18.3	31.7	4.4	18.9	5.35	0.452	5.25	0.582	5	1.14	4.5	0.641	4.93	0.824	6.36	0.503	15.2	4.65	2.27
UA1939-24	T1	20	77.7832	84.9	196	41.4	250	4.13	1.71	1160	25.2	55.3	5.35	24.8	4.54	0.991	5.93	1.14	6.07	2.07	4.9	1.18	4.18	0.662	8.39	0.41	20.1	5.76	2.93
UA1939-25	T1	20	77.7832	47.4	158	42.9	273	4.87	1.67	904	22.2	35.7	4.31	24.3	6.37	0.898	6.74	0.686	7.6	1.26	5.57	0.836	5.26	0.969	8.18	0.404	16.8	5.65	2.37
UA1939 avg.	T1	All 20 um	77.7832	52.8	154	37.9	253	4.41	1.8	891	19.4	34.9	4.61	20.1	5.03	0.851	5.69	0.862	6.06	1.39	4.64	0.741	4.92	0.836	7.71	0.512	18.4	5.24	2.52
s.d.				11.2	18.2	4.48	28.3	0.605	0.594	113	3.78	6.55	0.596	2.95	0.802	0.165	0.784	0.134	1.09	0.249	1.09	0.183	0.768	0.146	1.15	0.116	4.94	0.661	0.5
UA1943-1	T2	20	74.1126	63.1	185	64	388	7.56	3.63	866	21.7	76.2	5.38	43.1	7.72	1.66	9.57	1.42	8.87	2.12	6.96	0.928	6.69	0.927	11.1	0.644	30.4	10.7	4.39
UA1943-4	T2	20	74.1126	48.8	188	64.7	339	7.29	2.38	889	21.2	43.9	6.33	33.8	8.1	1.62	10.9	1.68	8.86	2.04	7.19	1.28	7.47	0.907	9.62	0.733	18.3	5.95	2.52
UA1943-5	T2	20	74.1126	59.3	125	55.8	318	5.77	2.02	822	19.6	39.2	5.25	24.6	6.12	0.999	7.49	1.34	9.35	2.35	6.55	1.07	7.62	1.03	9.2	0.493	16.6	6.04	2.3
UA1943-7	T2	20	74.1126	69.5	223	61.2	366	6.29	2.67	849	22.4	44.1	6.45	31.3	9.73	1.9	10.5	2.07	10.7	2.24	7.18	1.01	7.99	1.2	14	0.871	21.6	9.43	4.5
UA1943-8	T2	20	74.1126	49.9	193	67.6	341	6.77	2.11	898	23.5	49.9	7.22	39.1	9.89	2.02	11.3	1.58	10.7	2.22	6.68	0.969	7.52	1.45	10.3	0.76	18.9	6.75	2.4
UA1943-9	T2	20	74.1126	58.6	175	59.6	324	5.82	2.56	964	20.5	43.6	6.39	29.4	8.06	1.73	9.94	1.62	8.04	2.69	7.08	0.989	7.45	1.46	9.9	0.527	19.5	7.55	2.76
UA1943-11	T2	20	74.1126	53.1	183	60.3	332	6.35	2.4	867	25.7	44.9	6.92	31.8	8.74	1.6	10.4	1.5	10.9	2.39	7.87	1.09	7.24	1.12	10.4	0.657	27	7.61	3.38
UA1943-12	T2	20	74.1126	56.2	213	74.1	355	7.67	2.15	852	25.1	46.6	7	31.5	9.94	2.17	12.1	1.52	12.5	3.75	9.35	1.24	10.1	1.45	13.6	0.486	17.3	6.34	2.2
UA1943-13	T2	20	74.1126	51.9	186	59.9	332	6.51	1.96	804	22.7	47.7	6.75	30.9	8.94	1.66	10.7	1.32	9.65	2.68	6.75	1.08	7.4	1.39	9.11	0.773	32	9.95	3.34
UA1943 avg.	T2	All 20 um	74.1126	56.7	186	63	344	6.67	2.43	868	22.5	48.4	6.41	32.8	8.58	1.71	10.3	1.56	9.95	2.5	7.29	1.07	7.72	1.22	10.8	0.661	22.4	7.81	3.09
s.d.				6.71	27.3	5.38	22.2	0.707	0.512	46.5	2.01	10.8	0.687	5.41	1.24	0.332	1.28	0.226	1.37	0.52	0.863	0.12	0.956	0.23	1.81	0.137	5.85	1.79	0.878
UA1942-1	T2	20	74.1732	98.4	231	64.2	455	7.43	3.83	789	19.7	41.9	5.01	25.9	6.79	1.73	7.78	1.79	9.33	1.53	4.5	1.15	5.69	0.805	13.5	1.16	51.3	14.7	5.5
UA1942-2	T2	20	74.1732	54.2	216	75.6	414	6.91	1.93	934	23.6	43.9	6.83	35.1	9.58	2.14	11.8	1.81	11.4	3.27	7.59	1.12	8.52	1.04	12.1	0.528	22.3	9.16	3.6
UA1942-3	T2	20	74.1732	49.9	171	53.8	319	6.27	1.82	685	18.4	33.6	5.47	24	6.6	1.07	7.99	1.56	8.61	1.98	5.19	0.751	16	1	8.84	0.731	25.1	8.37	3.42
UA1942-4	T2	20	74.1732	64.4	136	80.1	400	7.35	2.37	1060	25.4	48.7	8.41	34.9	13.8	1.59	10.4	1.77	12.6	2.52	11	0.935	9.41	0.823	13.7	0.67	22	6.75	2.61
UA1942-5	T2	20	74.1732	54.4	186	60.5	302	5.7	2.03	860	19.6	43.8	6.76	29.3	8.13	1.82	9.23	1.33	10.7	2.77	6.4	0.85	7.53	0.976	9.13	0.492	17.6	5.07	2.76
UA1942-6	T2	20	74.1732	57.2	210	67.3	338	6.81	2.19	916	22.1	46.1	7.49	35.4	8.27	2.27	14.5	1.82	11.6	2.28	8.35	1.2	8.23	0.965	9.81	0.608	20.7	5.73	2.37
UA1942-7	T2	20	74.1732	54.8	226	71	367	7.53	2.36	944	26.5	47.9	8.58	29.1	6.52	1.52	7.01	1.24	9.58	2.56	8.98	1.4	5.52	1.13	8.26	0.512	24.6	7.54	2.06
UA1942-8	T2	20	74.1732	47.7	254	58.5	452	7.69	1.35	803	22	45.3	7.94	40.2	7.4	1.44	10.8	1.48	19.5	2.83	10.2	1.35	14.5	0.911	20.7	0.369	125	13.6	5.85
UA1942-9	T2	20	74.1732	54.2	188	64	324	6.56	2.22	852	34.3	42.7	6.64	31.4	7.65	1.83	8.2	1.53	11.7	2.9	8.78	1.29	6.7	0.967	8.83	0.628	22.8	6.45	2.39
UA1942-10	T2	20	74.1732	62	193	62.5	314	6.77	3.6	803	23.5	41	5.86	26.7	6.95	1.57	7.47	1.27	8.75	1.75	5.75	1.16	6.81	1.33	9.58	0.397	18.1	6.11	5.19
UA1942-11	T2	20	74.1732	56.5	234	72.8	394	7.5	2.48	976	21.9	52.9	7.55	37.2	8.58	1.93	11.3	1.88	10.4	2.47	7.48	0.988	8.53	1.28	13.4	0.868	52.7	14.8	4.73
UA1942-12	T2	20	74.1732	55.7	151	82.3	490	6.43	2.24	993	25.9	56	7.37	43.1	11.2	1.96	14	2.8	11.5	3.05	9.17	1.31	9.75	1.33	14.7	1.22	24.3	14.9	4.67
UA1942-13	T2	20	74.1732	51.4	209	62.8	320	7.12	2.52	890	19.8	40.6	6.25	33.8	9.51	1.49	10.1	1.71	13.1	2.27	7.01	1.06	7.02	0.972	9.36	0.666	20.9	6.64	2.85
UA1942-14	T2	20	74.1732	58.5	230	78.3	393	7.61	1.95	1000	29.7	48.3	7.54	45.7	11	1.69	10.5	2.2	13.2	3.67	7.99	1.18	8.64	1.84	11.5	0.825	28.9	9.29	3.37
UA1942-15	T2	20	74.1732	60.8	224	67.8	353	6.53	2.91	971	23.5	40.2	7.15	31.6	11.6	2.13	7.04	1.95	11.7	2.44	6.07	0.744	7	1.25	12	1.02	23.6	7.44	2.91
UA1942-18	T2	20	74.1732	59.2	186	65.9	298	5.68	2.41	848	18.8	42	6.5	31.2	7.98	1.32	10.4	1.32	8.48	2.45	6.52	0.959	6.71	1.23	9.98	0.61	18.9	4.79	1.7
UA1942 avg.	T2	All 20 um	74.1732	58.7	203	68	371	6.87	2.39	895	23.4	44.7	6.96	33.4	8.84	1.72	9.9	1.72	11.4	2.55	7.56	1.09	8.54	1.12	11.6	0.707	32.4	8.83	3.5
s.d.				11.4	32	8.12	59.9	0.645	0.626	97.5	4.26	5.36	0.998	6.06	2.1	0.322	2.29	0.396	2.67	0.546	1.8	0.204	2.9	0.258	3.18	0.253	26.8	3.61	1.3
T2 Overall average				57.988	196.64	66.184	361.12	6.7968	2.4036	885.4	23.084	46.04	6.7616	33.204	8.752	1.71436	10.0568	1.6604	10.8688	2.5288	7.4636	1.08412	8.2416	1.15132	11.3048	0.68992	28.816	8.4664	3.3508
s.d.				12.9637	45.4837	14.9706	82.1255	1.41746	0.660787	165.643	5.00362	10.7294	1.55171	8.29333	2.39727	0.466691	2.71694	0.48842	3.04698	0.719016	1.95411	0.2475	2.76428	0.307007	3.31631	0.237828	21.4226	3.33352	1.23758
UA1944-1	T3	20	68.641	45.6634	305.193	69.8328	343.944	7.50493	1.69084	793.273	21.8685	47.8015	7.61571	31.0874	10.1088	1.59158	9.11402	1.78251	10.8178	2.36757	7.40462	1.05895	7.26723	1.25534	11.4154	0.537677	18.7018	4.71444	2.09822
UA1944-2	T3	20	65.4878	48.9644	164.228	58.6505	307.786	6.10206	1.95656	720.475	18.9929	42.7803	6.19152	30.0897	6.87547	1.50304	9.01783	1.56867	10.2623	1.78056	5.51008	0.940651	6.84189	1.12135	9.13361	0.558614	17.4402	5.00474	2.23171
UA1944-3	T3	20	68.3331	41.3464	226.089	74.4274	309.091	7.18424	1.73882	752.478	24.2009	48.2452	7.24185	31.7056	9.09743	1.62971	10.3835	1.86207	11.0442	2.66873	8.14763	1.14469	8.2428	1.12965	10.1409	0.768077	14.7244	4.90527	1.58466
UA1944-4	T3	20	69.3223	40.3389	454.667	74.6761	354.146	7.29226	1.73244	835.951	24.2634	45.0357	6.08385	34.8194	12.6538	2.29253	10.8483	2.09431	12.9669	2.71891	9.84608	1.67998	8.70858	1.4332	11.9564	0.43872	16.3329	5.2846	2.29266
UA1944-5	T3	20	69.0331	45.3615	390.693	70.1622	358.924	8.00704	1.96404	796.007	21.981	44.5919	6.61247	30.4974	9.64652	2.03994	10.3744	1.61151	13.0885	2.39545	8.77957	1.07202	7.94355	1.34934	12.2145	0.792299	15.3046	5.84532	1.97175
UA1944-6	T3	20	68.9048	53.9311	245.324	62.4677	269.322	10.6353	2.76852	706.312	27.6141	46.4066	18.8489	33.0311	8.82131	2.17512	12.0324	1.99139	12.1038	2.83745	7.55951	1.11038	7.46676	1.41475	8.93929	0.528729	19.6794	5.72118	1.99075
UA1944-7	T3	20	71.9623	44.8501	302.184	82.8205	317.258	6.07953	2.27273	775.233	27.4547	45.6444	6.87049	37.1141	11.3561	2.00024	12.7715	1.80068	12.863	3.38404	8.70658	1.35688	9.96208	1.32916	8.78668	0.517577	12.4161	4.32033	1.86597
UA1944-8	T3	20	69.5595	36.636	285.493	72.8861	335.61	6.50882	1.34162	738.895	24.6676	47.6259	6.89218	39.5765	10.7079	2.45182	11.5266	1.95801	13.5565	2.88873	7.64172	1.49272	8.70859	1.45889	10.8677	0.412174	12.5471	4.90456	1.58238
UA1944-9	T3	20	68.697	44.106	286.327	81.6615	370.325	5.77068	1.79074	835.25	25.3221	48.794	8.34666	36.091	10.7999	2.44332	12.6662	2.00924	12.4521	2.9601	9.39183	1.55589	9.88075	1.41709	12.7128	0.663026	16.0381	5.59072	1.84695
UA1944-10	T3	20	69.0734	49.5373	256.481	88.5625	392.431	6.11964	1.57982	756.889	28.6047	50.3957	8.09008	40.2504	12.5819	2.12372	13.9013	2.20816	13.7246	3.50241	10.515	1.88488	9.56875	1.19677	12.7019	0.609068	14.7252	5.85625	2.14397
UA1944-11	T3	20	68.7963	35.0706	277.894	70.2247	311.192	5.74531	1.7845	723.573	23.6588	41.4851	6.60455	34.3809	8.12524	2.50901	10.8988	2.15583	10.5425	2.49092	8.44367	1.2129	7.64515	1.25187	9.72125	0.521484	13.5706	4.38837	1.94256
UA1944-12	T3	14	67.2316	32.8679	241.643	56.7249	263.285	4.92811	1.40112	1034.58	15.9177	33.3367	5.30762	30.4141	4.7168	1.69775	8.55883	1.16358	21.7099	2.14455	8.13012	0.587828	6.06765	0.79118	7.59077	0.861326	13.477	5.04705	1.65499
UA1944-14	T3	14	68.5317	38.7214	259.455	86.9927	354.725	6.16769	1.51235	838.203	21.5064	49.0301	7.37223	38.2652	10.1735	2.41432	13.3369	2.29114	14.197	3.51263	10.7803	1.42265	8.08007	1.76401	11.9005	0.839348	14.4835	4.88043	2.10619
UA1944-15	T3	14	67.9648	39.2251	219.238	66.2998	257.771	6.06251	1.34928	654.821	18.3077	38.3784	6.09164	31.8257	7.84841	2.04048	9.29569	1.63864	11.5503	2.00124	8.61309	1.05199	7.30159	0.945408	9.31433	0.515825	23.5821	4.24512	1.25838
UA1944-16	T3	14	69.3655	29.5691	261.27	70.1726	383.302	8.91819	1.24627	734.47	22.335	53.7112	6.31619	38.9062	10.4987	2.76202	14.9934	1.95864	18.3648	2.92861	9.8738	1.26213	7.09093	1.23745	11.8816	1.21425	16.1327	7.17444	2.0224
UA1944-17	T3	14	67.3527	34.3353	229.817	71.361	396.34	7.77809	1.21745	694.741	17.0312	39.3003	6.26512	28.3594	7.53281	2.06173	8.32119	1.24366	9.12171	3.06362	7.64172	1.1359	7.29945	0.708699	10.3113	0.389133	12.9097	6.80024	2.15569
UA1944-18	T3	14	67.5908	42.6669	224.98	74.6879	312.192	5.53117	2.02801	729.732	19.8101	41.7429	7.55567	31.7515	10.3925	1.7475	10.2631	2.12826	10.0594	2.12314	7.4556	1.60843	7.33615	1.19882	10.5922	0.263092	13.2744	5.18329	1.11923
UA1944-19	T3	14	68.0544	35.1007	224.701	69.2855	333.554	5.77293	1.43813	681.671	33.3681	37.9462	6.25378	32.5239	16.6298	1.75225	8.63216	1.87072	13.371	3.44618	11.6069	1.16203	8.3491	2.22548	7.95529	0.355945	13.1075	4.62175	1.86313
UA1944-21	T3	14	68.2007	36.8834	274.394	79.6489	330.779	5.73987	1.82114	774.651	22.8326	42.5969	6.80484	36.331	9.40963	1.8568	11.8779	1.57158	11.0632	2.7722	11.8193	1.58794	7.01894	1.31999	11.0912	0.200701	11.2588	4.17253	1.41635
UA1944-22	T3	14	68.0519	35.9903	316.353	77.3821	365.396	6.91652	2.09588	788.382	20.5277	41.1143	7.21173	34.7976	8.41316	1.13237	11.0314	2.2947	13.2174	3.47925	10.2543	1.62547	8.60421	1.61504	14.0631	0.739168	14.28	6.69999	2.11404
UA1944 avg.	T3	20/14 um	68.5077	40.5583	272.321	72.9464	333.369	6.73824	1.73651	768.279	23.0133	44.2982	7.42885	34.0909	9.81948	2.01126	10.9923	1.86016	12.8038	2.77331	8.90608	1.29772	7.96921	1.30817	10.6645	0.586311	15.1993	5.26803	1.8631
s.d.				6.27783	63.5534	8.4523	40.5069	1.34548	0.382055	80.9585	4.2106	4.94445	2.78878	3.49511	2.4872	0.403199	1.89646	0.318107	2.89392	0.531322	1.5926	0.309006	1.04174	0.32988	1.72467	0.235837	2.91602	0.864609	0.327714
T3-2-01	T3 Kiel Mount	20	74.05	42.3355	281.177	76.2025	293.992	6.08742	1.69246	698.47	20.5626	45.1733	7.32822	39.6992	10.806	1.95566	11.9564	1.92612	13.2201	2.71892	8.87082	1.26673	7.96433	1.3373	9.22452	0.47849	13.5115	3.50094	1.39885
T3-2-02	T3 Kiel Mount	20	67.81	43.8458	227.633	79.6415	351.645	6.10051	1.47463	710.926	21.0801	43.9424	7.01168	33.6669	9.27694	2.19512	12.1247	1.96997	11.8154	2.69374	7.64333	1.52419	9.29159	1.21018	11.1057	0.441716	13.3291	4.12795	1.53219
T3-2-03	T3 Kiel Mount	20	68.67	45.0426	242.891	75.8665	316.09	6.07368	1.56386	712.156	20.1872	40.9189	6.76756	35.9785	9.69803	2.14671	11.1446	2.04823	11.7405	2.43369	7.19849	1.04983	7.81213	1.19095	9.55941	0.471051	14.62	3.69139	1.4698
T3-2-04	T3 Kiel Mount	20	68.89	45.5733	230.239	73.4846	338.81	6.11298	1.88829	802.788	21.2666	46.8548	7.32607	38.0481	9.89512	2.44198	12.108	2.03086	15.3094	2.66131	7.2835	1.1444	8.22205	1.33961	9.96883	0.537317	13.8678	4.66423	1.62218
T3-2-05	T3 Kiel Mount	20	67.12	42.775	196.872	61.7338	286.544	5.73385	1.66788	685.394	17.7794	41.1004	6.17569	30.3478	8.89696	1.89955	9.13794	1.81632	10.2947	2.22743	7.12862	1.24408	5.99099	1.1679	8.19206	0.437421	13.9149	3.99293	1.43283
T3-2-06	T3 Kiel Mount	20	67.52	44.3487	199.965	62.5726	274.652	5.58168	1.57522	664.766	17.5865	40.0187	5.959	31.7194	9.44992	1.7852	10.4608	1.66551	10.9514	2.63406	7.29713	1.10406	6.67572	0.947534	8.11762	0.509485	13.5364	3.58739	1.49054
T3-2-07	T3 Kiel Mount	20	68.45	44.1928	237.483	76.2713	340.882	5.98971	1.86406	735.91	21.6135	43.5469	6.83763	36.3566	9.33476	2.24403	14.2398	1.90846	9.98727	2.99023	7.75428	1.6074	7.99478	1.40537	7.8973	0.59469	12.9612	4.42087	1.52806
T3-2-08	T3 Kiel Mount	20	71.95	45.5785	272.424	77.2531	329.084	5.8859	1.70472	749.668	21.0396	47.5316	6.47592	35.482	10.144	2.05505	12.3458	2.01251	12.3112	2.85781	7.43146	1.23532	7.38091	1.08517	10.0864	0.676907	13.541	4.26465	1.60655
T3-2-09	T3 Kiel Mount	20	66.43	49.7845	283.241	57.545	291.608	6.10012	2.13773	852.048	18.1827	41.496	6.23125	28.9513	8.80366	1.57401	7.15038	1.62191	9.53656	2.12043	6.4529	0.868326	7.03656	0.980799	8.80319	0.420561	15.6813	4.65808	1.7423
T3-2-10	T3 Kiel Mount	20	67.28	53.7569	227.651	75.7372	349.984	6.25265	1.82408	786.902	21.7977	44.9381	7.63394	38.2753	9.46662	1.97094	11.3197	2.09693	12.0038	3.02618	8.31035	1.35243	8.0483	1.25635	10.3294	0.469195	13.953	5.1871	1.68774
T3-2 avg.	T3 Kiel Mount	All 20 um	68.817	45.7234	239.958	71.6308	317.329	5.99185	1.73929	739.903	20.1096	43.5521	6.7747	34.8525	9.5772	2.02682	11.1988	1.90968	11.717	2.63638	7.53709	1.23968	7.64174	1.19212	9.32845	0.503683	13.8916	4.20955	1.5511
s.d.				3.48752	30.7226	7.85187	28.626	0.202234	0.194348	58.4943	1.6322	2.6056	0.559527	3.58518	0.594923	0.247394	1.94424	0.161442	1.69853	0.30027	0.668766	0.218852	0.917378	0.152484	1.06932	0.0799182	0.768398	0.539805	0.1114
T3 Overall average			68.6108	42.28	261.533	72.5078	328.022	6.48945	1.73744	758.82	22.0454	44.0495	7.2108	34.3448	9.73872	2.01645	11.0611	1.87667	12.4416	2.72767	8.44975	1.27837	7.86005	1.26949	10.2192	0.558769	14.7634	4.9152	1.7591
s.d.				5.97734	56.3912	8.14479	37.2621	1.15188	0.327654	74.439	3.79219	4.27227	2.30022	3.48222	2.04361	0.354346	1.8813	0.273771	2.57949	0.4661	1.49379	0.279638	0.998419	0.285673	1.64744	0.199979	2.47939	0.915294	0.310793
UA1947-1	T4	20	71.3892	37.4	332	76.6	313	8.39	0.771	773	27.2	50	7.73	36.5	7.65	2.09	17.5	1.35	15.3	3.55	8.19	0.418	8.82	0.947	10.7	1.01	20.5	6.76	2.49
UA1947-2	T4	20	71.3892	34.4	279	74.8	270	6.64	1.33	762	27.2	45.7	7.51	37.2	10.4	1.95	11.1	1.87	11.2	2.71	7.85	1.17	7.81	1.09	9.3	0.519	14.5	3.27	2.02
UA1947-3	T4	20	71.3892	35	302	70.2	288	7.06	1.24	791	23.8	49.5	7.21	36.1	9.81	2.09	11.4	1.79	11.4	2.81	7.23	1.04	7.84	0.989	8.82	0.699	14.2	3.69	1.99
UA1947-4	T4	20	71.3892	37.5	278	65.7	266	7.54	1.41	764	20.5	44.1	7.12	33.1	7.11	1.66	10.1	1.31	11.9	2.18	6.71	0.916	5.99	0.919	8.65	0.546	11.9	3.34	1.97
UA1947-6	T4	14	71.3892	46.3	259	63.1	259	8.57	3.68	800	38.3	63	10.6	45.1	8.7	2.84	14.5	2.08	10.6	2.4	6.75	1.21	7.59	1.14	7.56	0.522	17.2	6.69	2.23
UA1947-7	T4	14	71.3892	33.6	282	72.1	286	6.33	1.19	819	23.4	46.1	7.34	35.5	8.45	2.06	11.6	1.94	8.9	2.74	8.41	1.22	6.83	1.28	8.68	0.96	13.3	4.08	1.56
UA1947-8	T4	14	71.3892	34.4	239	61	254	7.05	1.63	754	22.4	35.9	6.38	32	10.2	2.06	8.99	1.78	11.8	2.12	7.06	1.25	6.55	1.31	8.34	0.764	15.2	5.2	2.04
UA1947-9	T4	14	71.3892	32.6	291	74.4	310	7.21	1.3	868	24.2	46.2	7.97	37.6	10.4	2.31	14	1.33	15.7	2.91	8.13	1.31	7.52	1.19	10.1	0.575	13.7	3.6	1.73
UA1947-10	T4	20	71.3892	34.5	272	69.3	268	6.24	1.63	748	23.2	49.6	6.39	33.9	10.2	2.11	11.2	1.54	10.6	2.57	7.48	0.826	7.8	1.38	8.9	0.4	17.6	3.84	1.71
UA1947-11	T4	20	71.3892	38.3	312	75.8	320	7.06	1.91	922	24	51.7	7.67	38.6	11.2	1.99	13.4	1.94	14	2.61	8.06	1.46	8.1	1.35	9.41	0.646	15.2	4.25	2.18
UA1947-12	T4	20	71.3892	40.1	274	68	293	8.57	1.57	749	23.2	44.2	6.69	36.8	10.9	1.78	9.05	1.67	11	2.29	8.59	1.34	7.95	1.15	8.96	0.717	18.5	5.03	2.97
UA1947-13	T4	20	71.3892	38.2	296	75.4	278	6.75	1.39	795	28.4	47.6	7.34	38.9	10.5	2.57	11.9	2.04	13.4	2.17	8.88	1.13	8.78	1.35	9.32	0.604	14.6	3.71	1.64
UA1947-14	T4	20	71.3892	40	328	83.7	323	7.81	1.42	828	25.1	46.9	7.53	40.5	11.1	2.27	12.1	2.07	13.8	2.58	10.8	1.41	9.48	1.39	10.6	0.929	15.6	4.29	1.93
UA1947-15	T4	20	71.3892	36.2	270	68.4	277	6.2	1.08	767	22.7	45.2	7.17	31.9	7.84	2.76	10.5	1.84	11.7	2.21	7.33	0.845	6.92	1.16	9.02	0.551	17	3.72	1.59
UA1947-16	T4	14	71.3892	32.9	282	74.3	274	6.52	1.25	856	21.3	42.6	7.01	32	10.4	1.57	10.6	1.3	10.6	2.59	6.94	0.957	7.58	1.37	11.2	0.685	17.9	4.22	1.94
UA1947-17	T4	20	71.3892	33.4	278	68.5	275	6.95	1.34	746	21.1	44.9	6.92	33.7	9	1.94	11.4	1.45	11	2.43	7.82	1.43	7.47	1.2	10.3	0.421	20.3	4.94	1.92
UA1947-18	T4	14	71.3892	32.5	279	67.8	251	6.05	1.91	773	21.3	45.2	7.44	35.7	7.49	1.81	10.4	1.79	12.3	2.53	7.65	1.41	6.47	1.08	8.83	0.568	14.8	10.5	1.72
UA1947-19	T4	14	71.3892	30.2	278	66.9	273	6.65	1.02	817	20.9	44.8	7.59	41.9	9.08	1.27	10.3	1.97	10.7	2.73	7.98	1.11	8.09	1.33	9.09	0.921	14.5	3.45	1.55
UA1947-20	T4	20	71.3892	51.4	248	62.9	250	7.41	3.27	743	25.5	46.5	7.01	33.9	7.05	2.04	7.31	1.99	11.4	1.95	6.31	1.04	7.91	1.15	7.79	1.02	24.8	6.13	2.31
UA1947-21	T4	20	71.3892	36.4	318	81.2	318	8.82	1.96	814	30.9	51.3	8.17	42.4	12.7	2.47	16.1	2.16	16	2.64	8.87	0.89	11.1	1.58	9.06	0.851	20.2	5.04	4.64
UA1947-22	T4	20	71.3892	41.7	303	74.7	290	6.96	2.02	821	26.4	49.3	7.2	34.7	11.8	2.23	11.1	1.91	11.9	2.92	11	1.49	9.07	1.56	10.5	0.901	22.9	5.16	2.25
UA1947-23	T4	20	71.3892	36.8	292	79.8	319	7.06	1.34	839	23.2	47.5	8.45	37.3	9.12	2.47	9.36	2.01	11.7	2.69	7.38	1.35	10.1	1.29	10.5	0.729	16.4	4.8	2.14
UA1947-24	T4	14	71.3892	29.2	288	76	285	5.39	0.714	805	26	41.3	6.64	29.4	8.6	1.68	9.84	1.29	10.2	2.64	5.83	1.36	7.55	1.3	8.06	0.254	14.3	3.79	1.5
UA1947-25	T4	20	71.3892	34.3	276	75.5	277	6.85	1.37	791	23.2	46.9	7.7	38.8	11.4	2.11	11.4	1.99	12.2	2.79	8.33	1.09	8.24	1.25	7.94	0.54	13.8	3.75	1.74
UA1947-26	T4	20	71.3892	38.8	304	78.7	295	7.66	1.57	877	25.3	48.7	8.2	36.1	9.79	2.36	12.5	2.12	12.2	2.46	9.09	1.37	8.07	1.64	10.3	0.587	17.3	3.8	1.69
UA1947-27	T4	20	71.3892	38.7	297	74.2	292	7.17	1.4	826	28	48	7.51	39.1	9.42	1.98	12.4	1.84	12.6	2.88	8.78	1.18	7.89	1.1	8.63	0.679	17	4.27	1.8
UA1947 avg.	T4	20/14 um	71.3892	36.7	287	72.3	285	7.11	1.57	802	24.9	47	7.48	36.5	9.63	2.1	11.5	1.78	12.1	2.58	7.98	1.16	7.98	1.25	9.26	0.677	16.7	4.67	2.05
s.d.				4.74	22	5.84	21.9	0.83	0.651	45.5	3.77	4.65	0.817	3.63	1.49	0.361	2.2	0.285	1.72	0.327	1.19	0.25	1.11	0.184	0.998	0.198	3.08	1.54	0.626
T4-1-01	T4 Kiel mount	20	71.3892	36.7526	306.904	72.3608	312.579	6.96407	1.232	864.701	24.5508	49.0784	7.04359	39.0931	9.78386	2.16915	12.9834	1.75554	10.9331	2.28368	7.29959	1.22838	8.07443	1.21299	8.26531	0.708916	15.297	3.87725	2.13114
T4-1-02	T4 Kiel mount	20	71.3892	35.836	281.004	66.5006	274.856	6.81934	1.29572	814.581	20.3587	46.4165	7.1903	36.1256	9.41599	2.86695	9.96428	1.73834	9.91837	2.30904	7.05196	0.970264	7.51935	1.0289	8.47632	0.639421	17.0983	3.58417	1.95224
T4-1-03	T4 Kiel mount	20	71.3892	39.1908	293.023	71.3163	309.871	7.22099	1.38124	791.812	22.5388	47.0073	7.35649	39.2683	11.0565	2.05593	10.7963	2.1084	12.3849	2.8069	7.23312	0.997369	7.14853	1.08124	8.96566	0.538819	18.3679	4.21223	1.91235
T4-1-04	T4 Kiel mount	20	71.3892	39.1135	289.713	69.7362	304.271	7.18225	1.48125	833.955	22.4099	47.054	7.34433	37.78	10.9442	2.20062	11.788	1.89727	11.8323	2.2174	8.38632	1.2792	7.76465	1.09731	8.48946	0.834402	15.5044	3.8458	1.83335
T4-1-05	T4 Kiel mount	20	71.3892	38.8329	273.212	64.4846	281.015	6.91624	1.44476	808.997	22.342	49.3159	6.90636	37.836	9.49056	2.20533	10.5449	1.78843	11.4355	2.23871	7.91508	1.24877	7.74412	0.957244	8.79045	0.659869	17.3719	3.36836	1.96109
T4-1-06	T4 Kiel mount	20	71.3892	37.9621	262.151	61.2925	259.976	6.44544	1.38377	801.75	19.6881	43.9508	6.93274	34.4669	8.64271	1.90586	9.06789	1.64479	9.98502	2.10515	6.6965	1.14622	6.63491	0.815586	7.41632	0.609262	16.9486	3.1035	1.7682
T4-1-07	T4 Kiel mount	20	71.3892	37.5866	239.33	54.5283	236.577	6.65854	1.16797	702.618	17.7872	40.8059	6.59188	31.4667	7.42881	2.14039	8.52204	1.20234	8.8487	2.10072	5.88332	0.795609	5.54857	0.751487	7.21629	0.491136	15.1724	3.0054	1.9013
T4-1-08	T4 Kiel mount	20	71.3892	36.0996	272.576	61.8938	286.287	6.28665	1.55833	764.768	21.0449	42.2516	6.23863	33.6039	7.64024	1.9749	12.6015	1.87355	11.3734	2.12131	6.63496	1.10644	6.54979	1.06644	8.61638	0.58443	18.9911	4.16911	2.03138
T4-1-09	T4 Kiel mount	20	71.3892	41.6164	306.747	70.6724	304.871	7.20984	1.62182	883.113	22.4206	49.7813	7.61953	43.2634	9.77875	2.43264	13.007	1.72392	11.7435	2.63784	8.32165	1.18635	9.02956	1.01883	10.5389	0.573398	17.4843	3.54934	2.27742
T4-1-10	T4 Kiel mount	20	71.3892	41.1179	285.022	70.7961	287.497	7.41399	1.27925	817.852	22.9174	45.1014	7.29401	35.8147	9.68503	2.24231	11.7387	1.53257	11.6772	2.64695	7.99017	1.1947	6.98832	1.12092	8.70572	0.457349	17.7627	3.08568	1.85688
T4-1 avg.	T4 Kiel mount	All 20 um	71.3892	38.4108	280.968	66.3582	285.78	6.91174	1.38461	808.415	21.6058	46.0763	7.05179	36.8719	9.38667	2.21941	11.1014	1.72652	11.0132	2.34677	7.34127	1.11533	7.30022	1.01509	8.54808	0.6097	16.9999	3.58008	1.96254
s.d.				1.9575	20.5315	5.76774	24.1223	0.364158	0.144778	50.4927	1.92196	3.03767	0.406439	3.34393	1.20477	0.270688	1.59113	0.240483	1.09454	0.256064	0.81247	0.151657	0.957144	0.140228	0.90486	0.109536	1.30297	0.441348	0.150671
T4 Overall average				37.1919	285.186	70.6273	285.05	7.05632	1.51559	803.671	23.9655	46.7629	7.36133	36.595	9.56046	2.12956	11.4184	1.76764	11.7842	2.51577	7.80174	1.14931	7.79228	1.18461	9.05669	0.658195	16.7555	4.36447	2.02432
s.d.				4.20002	21.4863	6.32832	22.1997	0.730986	0.561019	46.3202	3.64681	4.2372	0.751907	3.50699	1.40675	0.338656	2.04624	0.270634	1.6316	0.323055	1.12616	0.225612	1.10204	0.200759	1.0066	0.179185	2.69162	1.4037	0.534842
UA1952-1	T5	20	65.0262	20.7326	515.524	42.9044	155.172	3.77851	0.766365	526.64	14.659	32.188	5.21084	29.3763	7.68127	2.50318	7.79332	1.02924	7.72425	1.50716	5.69488	0.745386	4.57515	0.763512	5.00829	0.322619	11.086	2.20299	0.957527
UA1952-2	T5	20	71.5417	17.9941	592.928	34.2798	115.117	3.14644	0.670777	429.023	12.6853	28.0033	4.47976	22.8484	5.10142	1.60322	8.25258	0.943326	8.22918	1.54856	4.19862	0.708448	3.34628	0.74596	4.26092	0.284569	12.9382	1.59618	1.15965
UA1952-3	T5	14	57.3236	18.4571	329.979	56.533	256.135	7.10215	0.612468	591.563	19.5573	36.4031	5.62133	27.6584	8.15151	2.03124	9.79143	1.44411	9.214	2.54732	6.34641	0.909554	8.73682	0.539251	7.70073	0.417534	9.72423	2.51361	1.44454
UA1952-6	T5	14	65.7673	17.9166	562.602	38.5694	134.675	3.6137		461.754	12.9603	29.1424	4.86635	25.1205	9.59315	1.83807	6.39778	1.10428	8.53204	1.41434	3.76809	0.518478	5.28457	0.651448	5.08155	0.229301	9.29508	1.85221	0.97754
UA1952-7	T5	14	60.6544	23.1281	416.092	47.8666	192.089	5.20994	0.507601	564.079	18.3536	35.4854	5.87117	29.5435	9.58249	1.77097	8.764	2.0925	9.30084	2.31595	5.75854	1.12752	4.28982	1.06309	6.18654	0.388353	12.1679	1.65831	1.03403
UA1952-9	T5	14	69.9443	17.7846	538.344	30.3094	115.074	3.91404	0.660158	428.023	9.47297	22.1959	3.53455	19.4307	4.9925	1.82142	6.01386	1.4494	5.70577	0.995411	3.27502	0.545502	3.20246	0.46998	4.53385	0.203107	9.01364	1.27505	0.800745
UA1952-10	T5	20	67.0737	17.9397	503.51	34.1889	125.075	4.06039	0.758623	428.139	13.1105	29.8048	4.27966	22.2951	7.75677	1.93443	6.40969	1.21	5.93116	1.48545	4.56975	0.53477	4.56013	0.296096	4.18669	0.427451	8.74712	1.54087	1.03857
UA1952-11	T5	14	69.5213	19.232	618.839	42.5883	148.863	4.51459	0.468543	508.297	13.2691	32.7036	4.29908	23.3487	6.293	1.61047	10.1911	1.68725	10.2689	2.13125	3.67676	0.865166	4.57415	0.596831	4.64154	-0.186902	9.07013	1.6547	0.725315
UA1952-12	T5	20	67.9731	13.3163	517.14	31.101	121.364	3.39792	0.764048	425.867	11.451	27.8226	4.50549	20.8203	6.90693	1.87246	6.94253	0.768264	6.21361	1.72158	3.01892	0.428682	3.83018	0.623017	3.89837	0.385008	10.0453	1.6011	0.833949
UA1952-13	T5	20	59.5882	27.8243	279.743	41.9254	209.952	5.92658	0.892595	682.132	20.51	37.9204	5.77737	25.9234	6.77267	1.68293	8.28682	1.32001	7.67856	1.69853	4.97028	0.71243	6.11412	0.698517	6.03285	0.549414	15.1155	2.74911	1.66972
UA1952-14	T5	20	66.5201	16.8019	512.737	34.3611	125.162	3.15304	0.744022	426.492	13.5797	28.8462	3.88701	19.964	6.88828	1.41154	6.46267	1.09027	6.75164	1.17943	4.90552	0.693392	4.33215	0.750986	3.24383	0.299564	8.89778	1.68484	0.910749
UA1952-15	T5	20	56.1165	25.3404	249.862	52.2246	248.771	5.91363	0.841904	671.476	18.0193	37.121	5.46386	27.289	8.3322	1.28053	8.31961	1.31378	8.72904	1.62073	5.71849	0.646347	6.49482	1.15805	7.16978	0.628693	14.4755	3.14212	1.33662
UA1952-16	T5	20	64.051	15.5797	491.067	43.1679	153.009	3.64774	0.638676	446.392	16.5076	31.3512	5.20182	27.1414	6.23058	2.05667	7.92864	1.22804	8.67071	1.40598	4.50097	0.751228	4.80745	1.00635	4.03209	0.254283	9.66215	2.02011	0.920987
UA1952-17	T5	14	58.3122	22.1413	295.148	39.4474	174.073	5.21177	0.755611	577.457	14.6265	34.6283	5.34528	24.4924	7.86989	1.6559	7.36614	1.48152	8.20801	1.76295	4.80994	0.980123	4.72573	0.95278	6.3243	0.432215	10.8755	1.95146	1.20697
UA1952-18	T5	20	69.1066	15.0324	511.172	31.2831	116.402	3.36034	0.636923	420.827	29.6517	26.7601	4.36151	21.9506	5.55274	2.01884	6.25018	1.25651	5.66074	1.334	3.55384	0.538832	4.57549	0.481246	3.90864	0.46928	10.5781	1.61658	0.843343
UA1952-19	T5	14	68.4972	20.7499	540.824	39.0436	145.008	4.49572	0.521543	459.293	13.1834	29.3904	4.87627	22.9837	7.25487	1.71178	7.03177	0.989137	5.23274	1.33527	4.76538	0.793397	5.47274	0.712374	4.07451	0.0299189	10.3153	1.98359	0.963203
UA1952-20	T5	14	64.8529	19.7398	521.513	33.356	153.885	4.12498	0.873381	487.18	13.8475	30.8813	4.52579	23.1396	5.76107	1.53561	7.31069	0.815801	9.88089	1.9475	4.74853	0.933609	5.03454	1.06615	5.54267	0.16266	12.2041	2.1852	1.28108
UA1952-21	T5	14	62.3866	21.7008	436.338	39.9039	149.147	4.49773	0.832869	534.654	14.2623	38.587	5.50252	27.4048	6.29645	2.42247	7.71589	1.26013	5.7855	2.12674	4.09595	0.696381	4.9356	0.567945	6.18242	0.450759	12.016	1.93856	1.42187
UA1952-22	T5	20	67.2968	16.1443	581.996	46.2453	183.294	4.29942	0.501411	552.852	17.8538	35.6299	6.23397	28.3893	9.81889	2.26174	8.99118	1.40155	8.92465	1.91495	5.18277	1.10136	6.51785	0.879278	4.79579	0.424302	11.0934	2.10018	1.15619
UA1952-23	T5	20	65.7156	18.3027	527.025	42.7097	169.866	4.21796	0.789628	571.942	18.7096	35.6452	5.63641	30.0714	8.16118	2.50437	7.93692	1.30749	7.98226	1.78911	5.39646	0.645124	5.18219	0.864894	5.18228	0.454004	11.8444	2.44028	1.13554
UA1952-24	T5	14	62.1059	24.9042	454.76	41.5394	223.832	5.62199	1.42568	591.595	15.6789	30.7273	4.74434	24.4115	6.86264	1.2755	8.2736	1.12378	7.26171	1.45126	5.20827	1.06865	6.94049	0.827249	5.57385	0.50548	12.2375	2.83186	1.3526
UA1952-25	T5	14	68.3639	17.466	491.326	27.7857	109.572	3.71436	0.557616	417.429	10.6261	25.3351	3.88819	22.1978	7.58216	1.01517	5.57102	0.964676	6.75629	1.33776	3.42942	0.486208	3.85984	0.616614	3.13038	0.34679	10.3926	2.06112	0.965363
UA1952-26	T5	20	70.4247	16.0291	516.489	34.8555	136.209	4.06353	0.77563	439.037	12.3791	27.8036	4.04974	22.3921	6.88198	1.84609	7.11685	0.98387	6.28307	1.61714	4.64844	0.497637	4.01962	0.749192	3.50966	0.384189	11.5907	1.88616	0.916964
UA1952-27	T5	20	64.7588	18.6635	479.621	40.7961	173.466	4.76952	1.26453	567.777	16.4362	34.3436	5.06186	30.1558	5.55532	2.03415	8.96836	1.662	7.88255	1.84357	5.90393	0.966318	4.65316	0.763407	5.03727	0.390362	10.5723	2.20368	1.08995
UA1952-28	T5	20	65.3482	17.1299	473.614	35.4482	130.021	3.68314	0.642298	435.954	14.5531	29.59	4.87643	22.7031	6.63118	2.02753	7.42155	1.13789	7.15683	1.61484	4.44378	0.651012	4.69113	0.580454	3.70105	0.244857	10.8149	1.68085	0.935294
UA1952-29	T5	14	64.9091	18.5575	590.324	38.9198	147.568	4.31807	0.454835	488.331	15.0522	38.8926	5.9682	26.0806	8.67345	2.26429	7.96381	0.877287	9.80992	1.78713	6.45039	0.78823	4.72079	0.859077	6.96338	0.689886	12.2405	2.07936	0.895482
UA1952-30	T5	20	69.6589	18.0904	493.013	39.2929	148.471	4.0706	0.537724	426.135	15.0954	29.41	4.45797	23.2373	6.62804	1.80565	6.97269	1.01313	7.28237	1.30778	5.58128	0.637325	4.23026	0.582916	6.21219	0.325406	11.7743	2.08859	1.35274
UA1952 avg.	T5	20/14 um	65.2903	19.137	483.02	39.2832	157.825	4.36399	0.726748	502.235	15.4108	31.7264	4.9084	24.8285	7.17825	1.8443	7.6461	1.22056	7.66879	1.6571	4.76373	0.73967	4.95213	0.735802	5.04131	0.352337	11.0662	2.01995	1.08617
s.d.				3.26259	93.4164	6.50314	38.9614	0.929543	0.219452	77.6506	3.85474	4.24116	0.698005	3.08213	1.29453	0.362834	1.10651	0.289942	1.40326	0.346395	0.914701	0.19403	1.15582	0.199637	1.21492	0.173299	1.57406	0.423116	0.227294
UA1954-1	T5	20	63.6759	24.0949	359.367	45.0217	205.393	5.2419	0.855657	590.112	17.7529	34.1082	5.45457	25.645	9.98656	1.94023	9.18326	1.22442	7.70767	1.54398	5.8609	0.688637	6.01861	0.833998	6.88967	0.407884	12.1656	2.74454	1.5599
UA1954-2	T5	20	64.2277	18.6964	495.595	43.3429	159.699	4.48035	0.506753	510.428	15.2694	34.6354	6.10236	29.0465	6.77521	2.03803	9.42782	1.24506	7.29581	1.4243	5.31375	0.795609	5.29733	0.760692	5.59628	0.490064	10.5955	1.96768	1.37368
UA1954-4	T5	14	64.8712	13.5324	593.805	44.2261	167.351	4.60852	1.49229	502.991	15.375	32.2452	5.58917	22.3139	9.3882	2.30433	7.42964	1.45611	8.53891	1.94858	4.90842	1.01906	3.55663	1.09926	6.02352	0.242848	9.68431	2.45907	1.03136
UA1954-7	T5	20	64.1689	15.1759	387.748	31.2994	129.586	3.38023	0.436202	433.588	11.9897	26.5092	3.62954	21.0772	5.68743	1.61566	6.03524	0.802895	5.05522	1.37306	3.82282	0.590753	3.2578	0.687806	3.65462	0.232196	7.2305	1.81786	0.770965
UA1954-8	T5	14	65.1537	16.9364	477.603	38.1977	154.593	4.10653	1.24126	465.14	12.0698	30.7778	5.11511	22.7467	5.89295	2.06122	8.23852	0.966016	7.07574	1.95221	3.70627	0.620614	4.15376	0.531492	6.49153	0.272058	10.2074	2.45933	0.982571
UA1954-9	T5	14	69.2541	16.0412	666.243	35.0287	152.879	4.82628	0.62474	468.738	11.2532	26.7193	4.80775	23.7932	5.35708	2.18099	5.04378	1.03162	6.7686	1.58963	3.91756	0.624407	3.87248	0.321608	4.101	0.254298	9.5044	1.81172	0.827608
UA1954-10	T5	20	64.4041	18.1878	471.023	37.4929	151.76	4.33237	0.622282	465.568	14.1891	30.076	4.31686	23.4709	6.22391	1.98883	7.17253	1.3846	8.18073	1.48926	4.55715	0.597038	4.20386	0.584998	4.6903	0.444313	9.24352	1.60281	1.00129
UA1954-11	T5	20	68.4333	14.6706	539.951	35.5333	177.408	4.95829	1.36635	445.574	13.2483	27.0695	4.97777	22.0445	7.77533	2.18467	8.43192	0.834374	6.93723	1.5745	5.01482	0.752185	3.82959	0.648648	5.8057	0.390392	11.1348	2.17983	1.22507
UA1954-12	T5	20	68.6787	16.437	557.268	37.8969	149.57	3.90207	0.764481	498.866	13.9054	29.9495	4.8273	25.4618	5.61328	2.21756	7.60277	1.20513	8.68366	1.58793	6.01609	0.703601	4.68321	0.627454	4.10473	0.227805	9.55996	1.86462	1.05435
UA1954-13	T5	14	60.6463	16.8031	546.405	24.34	127.426	3.28058	0.576063	549.466	12.8352	25.7407	3.52903	14.7345	5.12233	1.82222	5.1936	0.806732	4.39703	0.653815	2.70909	0.653347	2.78834	0.448262	3.28585	0.210791	8.18035	1.85135	1.01423
UA1954-14	T5	14	71.0925	14.7835	576.599	36.0361	142.574	3.70223	0.631115	428.675	11.6721	25.7389	4.05168	24.0589	6.64064	2.26335	7.74282	1.04598	7.37748	1.76718	4.15153	0.839254	3.86543	0.955945	3.48742	0.272963	9.52884	1.67744	1.01852
UA1954-15	T5	14	68.4078	16.1603	513.88	31.9222	113.925	3.80412	0.375587	394.154	10.379	23.7021	4.2427	20.3665	5.91789	1.1691	7.36333	0.720869	6.50896	1.09071	3.84221	0.603784	3.50945	0.721124	3.01891	0.0327256	9.06596	1.52261	0.846026
UA1954-16	T5	20	66.0733	21.8761	486.566	33.8714	149.418	3.92578	0.728252	472.318	14.6418	29.0337	4.88742	24.3557	5.55579	2.32245	6.09862	1.07674	6.62681	1.4642	3.31269	0.706747	4.35421	0.872882	4.79129	0.309936	8.78393	1.87658	0.860796
UA1954-17	T5	20	62.0643	24.2382	320.591	38.733	170.589	4.96913	0.807722	601.825	15.3554	33.8215	5.76263	25.6625	7.45309	1.5822	8.0613	1.34209	7.24028	1.5522	4.66257	0.655391	4.69695	0.650446	5.45795	0.341404	10.3399	2.13559	1.34474
UA1954-18	T5	14	63.722	17.7538	483.761	38.8724	138.97	4.08071	0.421757	471.309	12.6696	27.5283	4.86161	20.4164	4.12696	1.92333	6.96227	1.20627	6.39565	1.34523	3.35787	0.471185	5.36932	0.702547	3.43165	0.522626	9.08149	1.73925	0.882998
UA1954-19	T5	14	69.5117	16.1387	542.884	31.0245	125.084	3.30531		411.098	10.448	24.086	4.05427	19.8447	6.02528	1.98313	9.19829	0.79829	4.82803	1.78026	2.95844	0.916341	4.76228	0.356953	2.82676	0.15338	8.83695	1.15932	0.99203
UA1954-20	T5	14	66.3916	18.1908	471.536	29.0426	119.695	3.0562	0.674716	380.888	10.6187	24.7886	3.24634	19.3634	5.00539	1.90084	8.49253	0.69451	6.92913	1.30208	3.67002	0.601233	4.11301	0.485325	3.04955	0.538243	9.92067	1.38565	0.541201
UA1954-21	T5	14	72.5888	16.462	621.146	41.5024	132.261	3.75928	0.455318	455.198	13.7133	26.1719	4.13651	26.6109	7.481	2.07239	7.83408	1.09163	8.37216	1.62105	5.50384	0.599926	5.73392	0.697365	4.9547	0.349079	9.79011	1.35355	0.908726
UA1954-22	T5	14	65.9537	18.7949	474.76	40.0189	150.812	4.22366	0.778014	470.713	15.4376	30.7332	4.7583	24.5358	7.38567	2.48536	7.24311	1.14659	7.15015	1.89814	4.15561	0.613908	3.74505	0.656062	5.07353	0.294608	11.0967	1.97069	0.915614
UA1954-23	T5	14	68.4616	15.6588	533.955	33.7352	130.483	3.629	0.364783	409.048	11.1457	24.7167	3.6459	21.2276	4.76457	2.1498	8.51593	1.22337	6.93371	1.63638	4.14919	0.620785	3.58307	0.675567	3.78141	0.237103	7.91991	1.58157	0.886893
UA1954-24	T5	14	69.4627	17.1737	549.306	32.991	197.185	5.89068	1.15926	447.358	9.39854	22.015	3.43024	20.1242	5.41823	1.99493	6.25205	1.59424	6.89198	1.31826	3.77554	0.643654	5.27774	0.675628	6.54963	0.282488	12.835	2.48355	0.994896
UA1954-25	T5	14	64.5625	15.4055	493.994	36.7236	120.484	3.77209	0.306863	425.055	12.5	26.83	4.27206	20.393	8.85393	1.52968	7.69464	0.731599	5.23493	1.35606	4.19043	0.391749	4.47754	0.709096	4.58938	0.175401	8.55864	1.78777	0.869432
UA1954-26	T5	14	71.1829	16.8275	613.74	38.8351	139.999	3.51355	0.313319	447.437	13.5901	30.1169	4.55318	24.6724	6.73968	1.69932	7.84188	1.18116	8.7145	1.5276	4.54582	0.796791	3.78908	0.69394	4.29573	0.158062	10.4555	1.91665	1.02402
UA1954 avg.	T5	20/14 um	66.6517	17.393	512.075	36.3343	148.137	4.11952	0.704672	467.198	13.0199	28.1354	4.53271	22.6942	6.48654	1.9752	7.52435	1.07871	6.94976	1.5129	4.26533	0.674174	4.30168	0.669439	4.60657	0.29742	9.72695	1.88474	0.996823
s.d.				2.74323	81.7594	4.99768	23.7693	0.70741	0.339495	56.1317	2.05888	3.51786	0.775274	3.05273	1.49343	0.302267	1.1872	0.251271	1.19455	0.285561	0.875125	0.135857	0.824255	0.175953	1.22015	0.125169	1.30628	0.391272	0.215596
T5 Overall average			65.9166	18.3348	496.385	37.9267	153.368	4.25153	0.71663	486.118	14.311	30.0745	4.73558	23.8467	6.86006	1.90452	7.59009	1.15531	7.33803	1.59077	4.53446	0.709542	4.65292	0.705275	4.84133	0.327075	10.4502	1.95775	1.04507
s.d.				3.16464	89.5755	6.05982	33.3751	0.846133	0.279754	71.0509	3.39702	4.32854	0.757692	3.25165	1.43041	0.343373	1.14509	0.282436	1.36263	0.328633	0.931577	0.173548	1.07163	0.192295	1.23679	0.156036	1.60811	0.41475	0.226627
T6-01	T6 Kiel Mount	20	70.97	51.8	234	59.2	287	9.23	1.82	702	20.6	47.6	6.67	30.4	8.42	1.68	11	1.7	8.59	2.18	7.19	0.841	6.92	0.888	9.35	0.625	22.9	3.85	2.27
T6-02	T6 Kiel Mount	10	70.97	45.6	237	67	328	9.44	1.65	753	22.3	47	7.68	29.7	10.1	2.18	9	1.74	10	2.37	8.19	1.03	6.95	1.38	10.4	0.779	21.8	5.32	2.37
T6-03	T6 Kiel Mount	20	70.97	49.5	228	60.4	319	9.52	1.85	762	22	50.1	7.58	33.4	8.11	1.96	9.15	1.65	10.5	2.07	6.72	1.34	7.62	0.93	9.32	0.732	22	4.41	2.34
T6-04	T6 Kiel Mount	20	70.97	51	267	64.7	340	9.95	1.66	755	23.6	51.4	7.31	39.6	9.87	1.77	9.63	1.74	11	2.34	7.45	0.93	6.75	1.11	9.12	0.57	19.9	4.63	2.38
T6-05	T6 Kiel Mount	20	70.97	49.9	231	57.1	301	9.87	1.71	733	21	47.8	6.94	32.4	8.63	1.58	7.6	1.52	9.17	2.01	5.64	0.8	6.21	1.01	7.87	0.646	19.3	4.56	2.41
T6-06	T6 Kiel Mount	10	70.97	49	199	51.1	251	8.34	1.7	620	18.7	37.5	6.3	27	7.66	1.76	7.06	1.08	10.3	1.9	5.12	0.737	4.72	1.09	6.59	0.496	20.9	3.99	1.91
T6-07	T6 Kiel Mount	10	70.97	49.2	217	53.9	276	7.91	1.97	643	19.5	43.2	6.04	27	7.9	1.55	8.15	1.48	10	1.92	5.41	1.11	5.94	0.789	7.65	0.723	20.9	4.47	2.2
T6-08	T6 Kiel Mount	20	70.97	49.1	200	51.3	268	8.59	1.8	643	18.7	42.7	6.06	30.2	7.8	1.65	8.14	1.07	8.34	1.8	5.25	0.727	6.2	0.89	7.2	0.751	18.2	3.29	1.81
T6-09	T6 Kiel Mount	20	70.97	55.7	212	55.6	289	8.62	1.78	682	20.2	44.9	6.1	29	7.04	1.44	8.44	1.37	8.62	1.96	5.82	0.736	5.01	0.981	8.68	0.521	19.8	3.88	2
T6-10	T6 Kiel Mount	10	70.97	48.6	282	71.7	396	11.8	1.67	885	27.4	51.8	8.06	48.9	12.9	1.67	12.1	1.86	14.4	3.11	8.84	0.884	10	1.37	13.5	0.676	37	7.3	2.92
T6-11	T6 Kiel Mount	20	70.97	49.3	284	73.9	408	8.28	1.92	774	24.9	48.1	8.02	35.4	8.97	1.5	10.3	1.89	10.6	2.94	7.29	1.25	6.69	1.21	13.3	1.02	30.7	5.4	2.36
T6-12	T6 Kiel Mount	20	70.97	48.1	241	62.3	314	9.56	1.66	727	22	48.3	6.94	33.1	8.89	1.93	8.9	1.69	9.99	2.14	7.16	1.14	6.64	0.889	9.59	0.753	22.3	4.39	2.08
T6-13	T6 Kiel Mount	20	70.97	51.1	262	77.4	412	10.1	2.05	811	27.2	48.9	8.4	39	11.6	2.09	10.2	2.07	13.1	2.61	8.38	1.34	8.41	1.26	11.7	0.415	22.6	5.53	2.23
T6-14	T6 Kiel Mount	20	70.97	47.9	257	69.2	366	10.2	1.85	833	25.2	54.6	7.89	38.4	9.72	2.05	11	1.81	11.8	2.59	7.54	1.15	6.62	1.25	11	0.891	23.8	4.88	2.42
T6-15	T6 Kiel Mount	20	70.97	50	263	69.9	368	9.55	1.78	787	24.3	49	7.6	38.1	10.4	1.69	11.4	1.7	10.9	2.32	7.74	1	7.13	0.961	9.62	0.558	24.2	4.98	2.17
T6-16	T6 Kiel Mount	20	70.97	50.6	259	68.2	351	9.88	1.88	796	24	50.4	7.49	36.3	9.44	1.76	10.2	1.85	10.2	2.38	7.38	1.12	6.84	1.06	9.38	0.782	30.5	5.22	2.28
T6-17	T6 Kiel Mount	20	70.97	49.4	275	75.1	455	11.7	2.08	836	27.4	56	8.71	40.9	10.6	2.26	12.9	1.99	13.9	2.9	8.88	1.18	9.16	1.41	12.3	1.01		7.82	3.65
T6-18	T6 Kiel Mount	20	70.97	51.1	282	78.7	408	9.85	1.69	854	29	53.4	8.62	37.2	11.1	2.25	10.4	1.9	13.5	2.84	8.49	1.32	7.72	1.24	11.4	0.947	23.9	5.36	2.64
T6-19	T6 Kiel Mount	20	70.97	49.8	318	70.7	392	9.84	1.75	861	26.2	55.5	8.07	45.3	10.2	2.21	11.7	1.97	13.9	2.67	8.91	1.2	7.98	1.26	10.5	0.749	27.4	5.77	2.53
T6-20	T6 Kiel Mount	20	70.97	49.7	261	70	362	9.85	1.9	831	23.3	51.6	7.86	38.1	9.32	1.8	10.4	1.58	10.5	2.43	6.89	1.22	7.47	1.15	9.19	0.953	23.5	5.1	2.12
T6-21	T6 Kiel Mount	20	70.97	50.6	239	59.7	322	9.62	1.69	739	22.3	48.2	6.63	34.7	7.99	1.74	9.58	1.61	9.73	2.22	6.06	1.1	6.61	1.03	8.27	0.624	23.8	4.59	2.14
T6-22	T6 Kiel Mount	20	70.97	50.2	236	58.5	318	9.5	1.87	750	22	47.3	6.9	33	9.42	1.6	8.93	1.5	10.4	2.02	6.42	0.956	6.89	1.2	8.47	0.918	23.8	5.24	2.28
T6-23	T6 Kiel Mount	20	70.97	49.4	251	63.7	352	9.27	1.75	754	22.9	49.3	7.01	34.8	8.8	1.7	8.75	1.57	8.66	2.35	7.13	1.01	6.89	1.23	9.44	0.798	22.1	4.86	2.29
T6-24	T6 Kiel Mount	20	70.97	49.6	223	59.6	322	8.99	2.09	741	22	47.8	6.71	34.1	8.84	1.75	9.11	1.44	9.51	1.9	6.54	1	5.89	0.97	8.27	0.556	21.4	4.86	2.46
T6-25	T6 Kiel Mount	20	70.97	48.5	237	61.2	313	8.92	1.6	716	21	43.7	6.81	33.6	7.54	1.78	12.5	1.54	11.3	2.11	6.12	1.02	6.42	1.11	8.89	0.705	17.9	4.77	1.92
T6-02 avg.	T6 Kiel Mount	20/10 um	70.97	49.8	248	64.4	341	9.53	1.81	760	23.1	48.6	7.3	35.2	9.25	1.81	9.86	1.65	10.8	2.32	7.06	1.05	6.95	1.11	9.64	0.728	23.3583	4.98	2.33
s.d.				1.76	28.5	7.93	51.2	0.899	0.139	69.8	2.82	4.21	0.794	5.26	1.39	0.239	1.53	0.252	1.76	0.364	1.15	0.188	1.15	0.171	1.77	0.165	4.32444	0.972	0.364
UA2014-2	T7	20	77.1735	91.7	79.4	29.5	127	7.35	3.62	1110	30.9	51.8	7.04	27.5	5.37	0.861	4.8	0.782	6.67	1.12	3.6	0.374	4.27	0.477	5.03	0.713	21.6	10.9	4.53
UA2014-3	T7	20	77.1735	92.2	88.4	29.6	128	7.33	3.7	1170	29.5	56	6.8	27.3	5.4	0.823	4.68	0.981	4.96	1.21	3.39	0.573	4.14	0.787	7.09	0.788	25.1	12.7	4.57
UA2014-4	T7	20	77.1735	98	92.5	32.1	156	7.69	3.68	1160	33	55.9	7.52	23.8	5.87	0.597	4.61	0.68	5.62	0.987	3.54	0.459	4.33	0.601	6.54	0.827	25.3	12.9	4.61
UA2014-5	T7	20	77.1735	89.9	78.5	28.8	118	6.59	3.77	1090	30.2	51.7	6.57	27.4	7.47	0.9	3.87	0.806	5.6	1.25	3.35	0.609	5.25	0.508	5.35	0.551	22.1	10.5	4.04
UA2014-7	T7	20	77.1735	95.1	78.5	29.1	123	6.85	3.56	1080	27.2	52.9	6.13	22.4	3.74	0.665	3.73	0.684	4.41	1.06	3.16	0.547	4.18	0.628	5.18	0.878	23.4	11	3.84
UA2014-8	T7	20	77.1735	94.7	78.5	27.7	116	6.82	3.95	1080	28.4	51.2	6.61	26.1	5.19	0.464	3.91	0.722	4.17	1.18	2.74	0.373	3.37	0.592	4.43	0.713	18.1	10.9	4.71
UA2014-9	T7	20	77.1735	91.6	78	27	119	6.75	3.1	1100	27.6	53.8	6.32	26.5	5.18	0.606	4.28	0.753	4.17	1	3.41	0.459	3.51	0.647	5.71	0.68	22.3	11.5	3.81
UA2014-10	T7	20	77.1735	97.8	81.7	28.5	120	6.84	4.11	1080	27.4	49.8	6.13	22.2	5.68	0.601	3.78	0.992	4.02	1.07	2.83	0.521	2.9	0.525	5.27	0.656	20.7	10.3	4.29
UA2014-11	T7	20	77.1735	95	81	26.2	119	6.71	3.5	1080	29.2	52.1	6.81	22.9	5.16	0.939	4.92	0.66	4.71	1.18	3.27	0.503	4.05	0.465	5.08	0.644	25.5	11.7	4.19
UA2014-12	T7	20	77.1735	97.2	77.1	29.5	119	6.63	3.88	1030	27	49.6	5.91	23.5	5.06	0.782	3.54	0.719	3.82	1.01	2.55	0.379	3.09	0.485	4.92	0.639	17.4	10.3	4.11
UA2014-13	T7	20	77.1735	90.7	75.2	27.2	112	6.58	3.51	1060	25.7	48.3	5.9	23.1	4.67	0.529	4	0.724	4.22	1.05	2.39	0.463	3.43	0.464	4.38	0.538	23.5	9.61	3.47
UA2014-15	T7	20	77.1735	96.1	73.5	25.2	111	7.01	4.02	1030	30.7	52.2	6.22	26.4	4.74	0.396	4.63	0.499	4.13	0.978	2.71	0.466	3.68	0.795	5.4	0.668	20.9	10.1	4.43
UA2014-16	T7	20	77.1735	93.9	75.8	23.9	110	6.89	4.41	1040	26.1	50.1	6.35	20.5	4.56	0.555	4.22	0.62	3.89	0.648	2.55	0.598	3.46	0.502	4.29	0.619	29.9	9.85	4.16
UA2014-17	T7	20	77.1735	98.2	78.8	27.8	126	7.43	3.9	1080	29.2	50.4	6.32	23.8	5.17	0.86	5.07	0.701	3.77	1.05	4.13	0.414	3.57	0.627	5.24	0.859	21	10.7	3.86
UA2014-18	T7	20	77.1735	97.6	89.4	30.9	137	6.56	3.57	1140	30.1	51.2	6.8	30.9	4.29	1.13	6.41	0.95	3.85	1.03	3.91	0.776	2.81	1.27	5.5	0.574	26.6	10.4	3.77
UA2014 avg.	T7	All 20 um	77.1735	94.6	80.4	28.2	123	6.93	3.75	1090	28.8	51.8	6.5	25	5.17	0.714	4.43	0.752	4.53	1.06	3.17	0.501	3.73	0.625	5.29	0.69	22.9	10.9	4.16
s.d.				2.86	5.48	2.12	11.7	0.353	0.311	43.4	2	2.18	0.445	2.75	0.837	0.203	0.726	0.136	0.839	0.141	0.522	0.109	0.64	0.207	0.75	0.107	3.25	0.959	0.364
All concentrations in ppm unless otherwise stated.

## Sheet: Table S7
Table S7. All Pb isotope analyses from single glass shards from El'gygtgyn core tephras obtained by LA-ICP-MS at Aberytwyth, with data for the 1642 BC eruotion of Aniakchak and USGS Reference materials.
Sample and ablation crater diameter	208Pb cps	206Pb/ 204Pb	207Pb/ 204Pb	208Pb/ 204Pb	206Pb/ 208Pb	207Pb/ 208Pb
T0-4 30um	14946.2	19.0252	16.1615	40.4067	0.470844	0.399971
T0-4 30um	22758.9	19.5092	16.318	40.4699	0.482066	0.403212
T0-4 30um	36844.1	18.8204	15.5666	38.843	0.484524	0.400757
T0-4 30um	35755.1	18.2775	15.3681	37.2409	0.49079	0.412668
T0-4 30um	30330.5	18.995	16.0233	38.7877	0.489718	0.413102
T0-4 30um	23821.2	20.1684	17.2135	42.1854	0.478088	0.408044
T0-4 30um	16714.1	20.8701	17.5837	44.4687	0.46932	0.395418
T0-4 30um	18255.6	20.7071	17.6519	41.8131	0.49523	0.422162
T0-4 30um	30163.3	18.4143	15.3471	37.9567	0.485139	0.404331
T0-4 30um	41161.2	17.856	14.9243	37.4613	0.476651	0.398393
T0-4 30um	29917.8	19.3952	16.2451	40.5018	0.478872	0.401095
T0-4 30um	31323	18.2931	15.2754	37.0911	0.493193	0.411835
T0-4 30um	16027.5	19.1018	15.7598	39.3048	0.485991	0.400965
T0-4 30um	20273.8	19.1812	16.1142	40.4314	0.474412	0.398555
T0-4 30um	31141.9	17.7426	14.7714	36.4902	0.486229	0.404806
T0-4 30um	21783.1	19.3598	16.4126	39.8682	0.485596	0.41167
T0-4 30um	20324.9	19.6083	16.9145	40.9659	0.478649	0.412893
T0-4 30um	27378.2	18.6006	15.2965	38.55	0.482508	0.396796
T0-4 30um	23965.2	18.2705	15.5372	38.0135	0.480631	0.40873
T1-2 20um	19782.4	17.9294	15.2795	37.0034	0.484534	0.412921
T1-2 20um	13528.4	19.0622	16.0315	39.0759	0.487824	0.410265
T1-2 20um	12337.9	20.9109	17.4864	42.6814	0.489929	0.409696
T1-2 20um	19323.2	18.1035	15.3678	37.5759	0.481785	0.408979
T1-2 20um	10041.9	16.1192	13.7956	33.7472	0.477645	0.408794
T1-2 20um	13137.2	20.352	17.5135	43.2403	0.470672	0.405027
T1-2 20um	20893.3	19.3961	16.5762	39.9227	0.485843	0.415207
T1-2 20um	12054.9	16.5687	13.8089	34.161	0.485019	0.404232
T1-2 20um	10188.3	19.1393	15.8012	38.506	0.497048	0.410357
T1-2 20um	23995.5	18.7752	15.8053	38.4286	0.488575	0.41129
T1-2 20um	12690.1	17.7361	14.3406	35.9446	0.49343	0.398965
T1-2 20um	10786.9	22.2336	18.1094	45.8616	0.484797	0.39487
T1-2 20um	24150.6	18.2792	15.8012	38.2182	0.478287	0.413448
T1-2 20um	24664.8	18.116	15.206	37.538	0.482604	0.405084
T1-2 20um	23779.4	18.5228	15.4712	38.3332	0.483206	0.403598
T2-1 20 um	11020	19.0415	15.7878	38.605	0.493238	0.408956
T2-1 20 um	11617.9	23.5181	20.2131	47.6564	0.493493	0.424141
T2-1 20 um	17525.5	20.123	16.9311	41.0095	0.49069	0.412857
T2-1 20 um	12597.5	19.5978	16.4792	42.121	0.465275	0.391235
T2-1 20 um	23265.8	18.2781	15.7358	38.7045	0.472247	0.406563
T2-1 20 um	21918.9	20.2261	17.5441	42.4078	0.476943	0.413699
T2-1 20 um	24232.7	17.8319	15.0514	37.6187	0.474017	0.400103
T2-1 20 um	20203.9	18.2768	15.5273	37.5984	0.486105	0.412976
T2-1 20 um	25962.2	19.3163	15.875	39.1041	0.493973	0.405968
T2-1 20 um	13596.2	17.7912	14.9754	37.3306	0.476585	0.401155
T2-1 20 um	24608.4	17.5524	15.8776	36.7396	0.47775	0.432166
T2-1 20 um	12779.2	19.2717	16.7754	40.6589	0.473986	0.412589
T2-1 20 um	21525.8	19.6233	16.687	41.1781	0.476546	0.40524
T2-1 20 um	19034.6	18.7515	15.673	38.5237	0.486753	0.406841
T2-1 20 um	19479.2	19.3209	15.9247	39.685	0.486856	0.401277
T2-1 20 um	15033.6	19.5847	16.5225	40.2369	0.486735	0.41063
T2-1 20 um	22361.8	18.101	15.3042	36.7877	0.49204	0.416014
T2-1 20 um	16688.8	16.4951	14.1174	35.0785	0.470233	0.402452
T2-1 20 um	27859.5	17.3762	14.7072	35.6436	0.487498	0.412619
T3-2 30 um	29462.4	17.4944	14.7854	35.6493	0.490737	0.414746
T3-2 30 um	20048.5	17.4547	14.4671	35.5495	0.490998	0.406956
T3-2 30 um	32968.9	18.1506	15.3589	37.7412	0.480923	0.406954
T3-2 30 um	20913.6	17.391	14.9611	36.4159	0.477567	0.41084
T3-2 30 um	33838.2	18.4348	15.831	38.3328	0.480915	0.412988
T3-2 30 um	25519.8	17.3044	14.441	36.4128	0.475227	0.396591
T3-2 30 um	23860.9	21.4144	17.5094	42.8574	0.499665	0.40855
T3-2 30 um	33734.4	18.97	15.9902	39.7053	0.47777	0.402722
T3-2 30 um	21352.5	20.7773	17.3034	43.0003	0.483189	0.402403
T3-2 30 um	23993.7	17.7137	15.2884	36.8102	0.481217	0.415331
T3-2 30 um	22916.3	16.7171	14.4032	35.617	0.469358	0.404391
T3-2 30 um	21639.6	18.9545	16.188	38.9954	0.486071	0.415127
T3-2 30 um	23383	18.677	15.8726	38.9546	0.479454	0.407465
T3-2 30 um	20923.3	17.677	15.0498	36.1786	0.488602	0.415985
T3-2 30 um	24200.4	18.6124	15.7863	38.5297	0.483065	0.409717
T3-2 30 um	15355.3	19.3741	16.4483	40.1756	0.482235	0.40941
T3-2 30 um	19653.2	15.7281	13.2468	32.7388	0.480412	0.40462
T3-2 30 um	34215.8	17.4783	14.7742	36.3528	0.480797	0.406411
T3-2 30 um	23068.4	19.3121	16.2934	40.596	0.475714	0.401355
T3-2 30 um	40870.6	17.9766	15.0199	36.9204	0.486901	0.40682
ET3-3 (dup) 30 um	37181.9	18.1416	15.5035	37.6031	0.482449	0.412294
ET3-3 (dup) 30 um	24959.4	19.4324	16.2915	39.9988	0.485825	0.407299
ET3-3 (dup) 30 um	53126.1	19.1449	16.3077	39.5203	0.484432	0.41264
ET3-3 (dup) 30 um	44237.3	18.0744	15.7646	38.0554	0.474949	0.414253
ET3-3 (dup) 30 um	48021.6	18.3008	15.5617	38.3108	0.477693	0.406195
ET3-3 (dup) 30 um	43972.1	18.7227	15.9119	39.1118	0.478697	0.406831
ET3-3 (dup) 30 um	37247.2	18.0087	15.2137	37.868	0.475564	0.401757
ET3-3 (dup) 30 um	58404.3	18.6891	15.8853	38.7442	0.482372	0.410004
ET3-3 (dup) 30 um	26900	20.3121	17.3977	42.5527	0.47734	0.408849
ET3-3 (dup) 30 um	55936.6	18.5095	15.9212	38.8077	0.476954	0.410259
ET3-3 (dup) 30 um	26686.1	17.7332	14.881	37.2308	0.476303	0.399694
ET3-3 (dup) 30 um	70630.2	17.941	14.9894	36.7778	0.487822	0.407566
ET3-3 (dup) 30 um	38484.3	17.9953	15.292	37.9044	0.474755	0.403435
ET3-3 (dup) 30 um	37882.8	17.8554	15.2974	36.8569	0.484451	0.415048
ET3-3 (dup) 30 um	54015.8	18.4778	15.7299	38.2238	0.483411	0.41152
ET3-3 (dup) 30 um	52273.5	18.2428	15.4649	37.9363	0.48088	0.407655
ET3-3 (dup) 30 um	59910.1	18.8624	15.6353	38.8092	0.48603	0.402876
ET3-3 (dup) 30 um	65915.2	18.1926	15.594	38.237	0.475786	0.407826
ET3-3 (dup) 30 um	24926	18.147	15.2105	37.9447	0.478249	0.400858
ET3-3 (dup) 30 um	35629.2	18.6498	15.7222	38.2216	0.487939	0.411345
T4-1 20 um	21438.5	19.5567	15.815	40.109	0.487588	0.3943
T4-1 20 um	27240.1	19.4015	16.2608	40.4374	0.47979	0.402124
T4-1 20 um	21327	18.7766	15.9393	38.8018	0.48391	0.410789
T4-1 20 um	17069.6	19.0814	16.2027	39.3745	0.484614	0.411503
T4-1 20 um	19540	18.0385	15.0888	36.9672	0.487959	0.408168
T4-1 20 um	10619.7	17.3321	14.9046	36.5826	0.47378	0.407423
T4-1 20 um	17092.9	18.1617	15.4481	38.2005	0.47543	0.404396
T4-1 20 um	18643.5	20.4299	17.0573	42.4431	0.481347	0.401886
T4-1 20 um	24216	17.8125	15.122	36.6775	0.485652	0.412295
T4-1 20 um	20658.6	17.3012	14.3652	35.2839	0.490343	0.407133
T4-1 20 um	18231.2	18.809	15.5081	38.5261	0.488214	0.402536
T4-1 20 um	16655.4	16.5938	13.968	34.7498	0.477521	0.401957
T4-1 20 um	13752.7	16.8672	14.2426	35.6363	0.473316	0.399665
T4-1 20 um	27535.3	18.5458	15.7194	39.2638	0.472339	0.400354
T4-1 20 um	26290.1	17.5955	14.7671	35.6866	0.493057	0.413799
T4-1 20 um	27375.1	17.8461	14.9957	36.9817	0.482567	0.405489
T4-1 20 um	14139.5	15.822	13.6017	32.6831	0.484105	0.416171
T5-1 mostly 30 um	13820.8	19.5274	16.645	40.8633	0.477871	0.407334
T5-1 mostly 30 um	11395.9	21.4114	17.5973	43.1791	0.495875	0.407541
T5-1 mostly 30 um	15956.3	18.4512	15.1513	36.9986	0.498702	0.40951
T5-1 mostly 30 um	10756.2	19.9256	16.493	40.4777	0.492262	0.407459
T5-1 mostly 30 um	22060.2	19.875	16.7464	41.4031	0.480036	0.404472
T5-1 mostly 30 um	40811.3	18.5967	15.5348	38.0529	0.488707	0.408243
T5-1 mostly 30 um	35610.2	18.1859	15.3934	38.3859	0.473766	0.401018
T5-1 mostly 30 um	15336.5	19.6663	16.4868	40.4137	0.486625	0.407951
T5-1 mostly 30 um	22828.3	20.6408	17.1128	42.2302	0.488768	0.405227
T5-1 mostly 30 um	26318.9	18.5104	15.6274	38.2442	0.484006	0.408621
T5-1 mostly 30 um	24808.3	18.8137	16.162	39.6671	0.47429	0.407442
T5-1 mostly 30 um	38389.7	17.7606	15.0975	36.8721	0.48168	0.409455
T5-1 mostly 30 um	19479.4	18.2878	15.5877	37.8038	0.483757	0.412332
T5-1 mostly 30 um	19471	19.7721	16.6338	40.8301	0.484253	0.407392
T5-1 mostly 30 um	50428.8	18.4704	15.3311	37.8049	0.488571	0.40553
T6-1 mostly 20 um	28236.4	18.8605	16.0354	39.4781	0.477745	0.406184
T6-1 mostly 20 um	14044.2	16.4875	13.9672	34.3292	0.480276	0.40686
T6-1 mostly 20 um	12965	16.0936	13.8232	33.3455	0.482632	0.414546
T6-1 mostly 20 um	22940.7	20.1493	16.707	40.5909	0.4964	0.411596
T6-1 mostly 20 um	26166.4	17.8249	14.9553	37.3451	0.477301	0.40046
T6-1 mostly 20 um	29834	18.963	16.1206	38.7692	0.489125	0.41581
T6-1 mostly 20 um	28045.9	19.4323	16.3518	41.0907	0.472913	0.397944
T6-1 mostly 20 um	33699.9	19.5481	16.6303	40.6983	0.480317	0.408625
T6-1 mostly 20 um	12356.7	19.6772	16.4087	40.6963	0.483513	0.403199
T6-1 mostly 20 um	30678.4	20.4797	17.0008	42.121	0.486211	0.403618
T6-1 mostly 20 um	35153.8	19.8461	16.2811	40.4051	0.491179	0.402945
T6-1 mostly 20 um	35478	18.9116	15.8439	39.1523	0.483026	0.404674
T6-1 mostly 20 um	25804.8	19.9273	15.6168	38.6909	0.515038	0.40363
T6-1 mostly 20 um	49955.6	19.4443	16.0009	38.8944	0.499927	0.411394
T6-1 mostly 20 um	157121	19.8671	15.8106	39.2733	0.505868	0.402579
T6-1 mostly 20 um	422310	20.2357	15.8239	39.8785	0.507433	0.396802
T6-1 mostly 20 um	105305	19.2819	15.1316	37.8757	0.509083	0.399507
T6-1 mostly 20 um	23546.8	19.8389	16.1056	39.3268	0.504463	0.409532
T6-1 mostly 20 um	34165.7	17.8473	14.673	36.8299	0.484588	0.398398
T7-2 20 um	17397.3	17.1806	14.2249	34.7643	0.494202	0.409181
T7-2 20 um	28588	18.9591	15.343	39.4037	0.481151	0.38938
T7-2 20 um	47689.2	18.4264	15.704	38.4694	0.478988	0.408221
T7-2 20 um	30095.1	18.7528	15.5027	37.327	0.502393	0.415321
T7-2 20 um	30682.1	18.6188	15.6107	38.1088	0.488569	0.409636
T7-2 20 um	18251.1	19.3216	15.8277	37.8752	0.510138	0.41789
T7-2 20 um	34014.8	18.7457	15.7507	38.706	0.484309	0.406933
T7-2 20 um	30363.1	18.481	15.208	38.0369	0.48587	0.399821
T7-2 20 um	17188.7	17.838	14.7211	36.0861	0.494318	0.407944
T7-2 20 um	18298.5	19.2675	16.6653	40.6514	0.473968	0.409957
T7-2 20 um	18160.8	17.9234	15.2427	38.1499	0.469814	0.399548
T7-2 20 um	31891.6	17.5804	14.6907	36.1129	0.486816	0.406798
T7-2 20 um	37137.6	18.7734	15.5832	38.6758	0.485403	0.402917
T7-2 20 um	28795	18.1672	15.7359	37.7005	0.481881	0.417392
T7-2 20 um	25562.1	17.8295	15.341	36.2239	0.492203	0.423505
T7-2 20 um	37625.5	18.1764	15.3706	38.9646	0.466485	0.394475
T7-2 20 um	14642.7	17.9701	16.9502	38.6337	0.465141	0.438742
T7-2 20 um	21326.2	16.2378	12.3978	32.8142	0.494842	0.37782
T7-2 20 um	18423.7	16.2713	14.5609	33.4472	0.486478	0.435339
Aniakchak UT2011 LAICP 14/20 um	22221.6	17.7484	14.2936	35.2044	0.504154	0.406018
Aniakchak UT2011 LAICP 14/20 um	13484.7	18.5357	15.1136	37.3585	0.496158	0.404556
Aniakchak UT2011 LAICP 14/20 um	24770.1	20.5089	17.5867	42.013	0.488156	0.418601
Aniakchak UT2011 LAICP 14/20 um	34806.1	19.7949	16.4227	39.8622	0.496583	0.411986
Aniakchak UT2011 LAICP 14/20 um	24171	18.3813	15.0583	37.277	0.493099	0.403957
Aniakchak UT2011 LAICP 14/20 um	12086.1	17.402	14.368	35.7334	0.486997	0.40209
Aniakchak UT2011 LAICP 14/20 um	19112.2	20.6244	17.1939	41.7956	0.493458	0.41138
Aniakchak UT2011 LAICP 14/20 um	19898.8	17.756	14.4788	36.1768	0.490812	0.400223
Aniakchak UT2011 LAICP 14/20 um	17514.9	17.4348	14.8655	35.33	0.493485	0.420762
Aniakchak UT2011 LAICP 14/20 um	14600.8	21.2527	17.0138	42.2014	0.503603	0.403157
Aniakchak UT2011 LAICP 14/20 um	24305.7	20.1907	16.4946	41.0107	0.492328	0.402202
Aniakchak UT2011 LAICP 14/20 um	12567.2	18.4077	15.0323	37.5838	0.489779	0.399967
Aniakchak UT2011 LAICP 14/20 um	12818.1	17.8645	14.617	35.8121	0.498838	0.408157
Aniakchak UT2011 LAICP 14/20 um	15882.8	20.4963	16.5395	40.7997	0.502364	0.405382
Aniakchak UT2011 LAICP 14/20 um	22000.4	17.7659	14.6074	35.1885	0.504878	0.415117
Aniakchak UT2011 LAICP 14/20 um	21374.5	21.1843	17.0488	43.2073	0.490294	0.39458
Aniakchak UT2011 LAICP 14/20 um	9665.27	18.0829	15.388	37.5884	0.481075	0.409381
Aniakchak UT2011 LAICP 14/20 um	12683	18.787	15.5067	39.665	0.473642	0.390941
BCR-2G 30um	42972.9	18.8628	15.8718	39.3203	0.479722	0.403653
BCR-2G 30um	29691.8	18.1385	15.2742	37.2951	0.48635	0.409551
BCR-2G 30um	28721	19.0809	15.8636	39.4913	0.483168	0.401699
BCR-2G 30um	25327.5	19.265	16.0349	39.7372	0.484809	0.403524
BCR-2G 30um	21975.1	18.2359	15.1267	37.5084	0.486181	0.403287
BCR-2G 30um	22729	17.2226	14.1745	35.6082	0.483669	0.398068
BCR-2G 30um	27091.8	18.4294	15.0778	37.9718	0.485345	0.397079
BCR-2G 30um	24490.3	20.2687	16.8238	41.8848	0.483914	0.401667
BCR-2G 30um	23448.3	19.3632	15.7635	40.3103	0.480354	0.391053
BCR-2G 30um	26482.8	18.5249	15.7037	38.7018	0.478658	0.405761
TB-1G 30um	75830.3	18.5653	15.726	39.1485	0.474228	0.4017
TB-1G 30um	77357.8	18.7878	16.0528	39.6695	0.473609	0.404665
TB-1G 30um	75649.8	18.4736	16.0776	39.1663	0.471671	0.410495
TB-1G 30um	75406.2	18.418	15.8635	38.7674	0.475089	0.409195
TB-1G 30um	77178.7	18.2821	15.4537	38.1939	0.478664	0.404611
TB-1G 30um	75796.6	18.023	15.343	38.1199	0.472797	0.402494
TB-1G 30um	77913.4	18.5318	15.5494	38.6066	0.480017	0.402766
TB-1G 30um	84756.4	18.6393	15.7157	39.0428	0.477407	0.402524
TB-1G 30um	85543.3	17.886	15.2318	38.1276	0.469108	0.399496
TB-1G 30um	83874.3	18.1318	15.3907	37.9677	0.47756	0.405362
